# Supplementary material for: The 3 × 2 Achievement Goals in the Education, Sport, and Occupation Literatures: A Systematic Review with Meta-Analysis
Source: MDPI journal article supplement (doi:10.3390/ejihpe13070085), 2023-06-21
Supplement: s1 [file s1]

**Supplemental File.** Search results.

| Database       | Search Term                  | Time | Sort by   | Yes | Duplication | Criteria1 | Criteria2 | Criteria3 | Initial Screening | Article citation                                                                                                                                                                                                                                                                           |
|----------------|------------------------------|------|-----------|-----|-------------|-----------|-----------|-----------|-------------------|--------------------------------------------------------------------------------------------------------------------------------------------------------------------------------------------------------------------------------------------------------------------------------------------|
| Google Scholar | "3x2 achievement goal model" | any  | relevance |     |             |           |           |           |                   |                                                                                                                                                                                                                                                                                            |
|                |                              |      |           | x   |             |           |           |           | yes               | Lower, L. M., & Turner, B. A. (2016). Examination of the 3x2 achievement goal model in collegiate recreation: Comparison across sport programs. <i>Journal of Amateur Sport</i> , 2(2), 75-102.                                                                                            |
|                |                              |      |           | x   |             |           |           |           | yes               | Thomas, C. L. (2021). Predicting test anxiety using the 3x2 achievement goal model. <i>International Journal of School &amp; Educational Psychology</i> , 1-11.                                                                                                                            |
|                |                              |      |           | x   |             |           |           |           | yes               | Lower, L. M., Newman, T. J., Pollard, W. S., & Lower, L. (2016). Examination of the 3x2 achievement goal model in recreational sport: Associations with perceived benefits of sport participation. <i>International Journal of Sport Management, Recreation &amp; Tourism</i> , 26, 44-53. |
|                |                              |      |           | x   |             |           |           |           | yes               | YERDELEN, S., & PADIR, M. A. (2017). Adaptation of 3x2 achievement goal questionnaire for teachers into Turkish: Validity and reliability study. <i>Bartın University Journal of Faculty of Education</i> , 6(3), 1027-1039.                                                               |
|                |                              |      |           | x   |             |           |           |           | yes               | Lüftenegger, M., Klug, J., Harrer, K., Langer, M., Spiel, C., & Schober, B. (2016). Students' achievement goals, learning-related emotions and academic achievement. <i>Frontiers in psychology</i> , 7, 603.                                                                              |
|                |                              |      |           | x   |             |           |           |           | yes               | Nikitskaya, M. G., & Uglanova, I. L. (2021). The Russian Version of the Educational Achievement Goal Questionnaire: Development, Validation and Research of Functionality. <i>Psychological Science and Education</i> , 26(5), 67-84.                                                      |
|                |                              |      |           |     |             | x         |           |           | no, no 3x2        | Brockbank, R. D., Smith, D. T., & Oliver, E. J. (2020). Dispositional goals and academic achievement: refining the 2x2 achievement goal model. <i>Sport and exercise psychology review.</i> , 16(1).                                                                                       |
|                |                              |      |           | x   |             |           |           |           | yes               | Cecchini, J. A., Méndez-Giménez, A., & Garcia-Romero, C. (2021). Intra-individual changes in 3x2 achievement goals, friendship goals, motivational regulations and consequences in physical education. <i>Revista Latinoamericana de Psicología</i> , 53, 180-189.                         |
|                |                              |      |           |     |             | x         |           |           | no, no 3x2        | Sarıcı, E., & Kondakçı, E. (2016). Investigating the role of students goal orientations on their understanding of chemical equilibrium concepts.                                                                                                                                           |
|                |                              |      |           | x   |             |           |           |           | yes               | Luo, S., Gan, J. S., Loh, A. P., Ee, E. W. H., & Soh, E. K. (2019, December). Evaluating Student Academic Motivations in One-year CubeSat Project using 3x 2 Achievement Goal Framework. In 2019 IEEE International                                                                        |

|  |  |  |  |   |   |  |   |  |                 |                                                                                                                                                                                                                                                                                                                                      |
|--|--|--|--|---|---|--|---|--|-----------------|--------------------------------------------------------------------------------------------------------------------------------------------------------------------------------------------------------------------------------------------------------------------------------------------------------------------------------------|
|  |  |  |  |   |   |  |   |  |                 | Conference on Engineering, Technology and Education (TALE) (pp. 1-7). IEEE.                                                                                                                                                                                                                                                          |
|  |  |  |  |   |   |  | x |  | no, citation    | Uglanova, I. L., & Nikitskaya, M. G. Russian adaptation of the test based on 3x2 Achievement Goal Model (Elliot, Murayama, Pekrun, 2011). 2021. Mendeley Data, 1.                                                                                                                                                                    |
|  |  |  |  |   |   |  | x |  | no, citation    | Elliot, A. J., & Kou, M. Pekrun Reinhard,(2011). "A 3x2 achievement goal model". Journal of Educational Psychology, 1033, 632-648.                                                                                                                                                                                                   |
|  |  |  |  | x |   |  |   |  | yes             | Altmeyer, M., Lessel, P., Waqar, A. U. R., & Krüger, A. (2021). Design guidelines to increase the persuasiveness of achievement goals for physical activity. arXiv preprint arXiv:2107.12599.                                                                                                                                        |
|  |  |  |  | x |   |  |   |  | yes             | García-Romero, C., Méndez-Giménez, A., & Cecchini-Estrada, J. A. 3X2 ACHIEVEMENT GOALS AND PSYCHOLOGICAL MEDIATORS IN PHYSICAL EDUCATION STUDENTS METAS DE LOGRO 3X2 Y MEDIADORES PSICOLÓGICOS EN ESTUDIANTES DE EDUCACIÓN FÍSICA.                                                                                                   |
|  |  |  |  | x |   |  |   |  | yes             | Üztemur, S. (2020). Achievement goals and learning approaches in the context of social studies teaching: Comparative analysis of 3x2 and 2x2 models. Participatory Educational Research, 7(2), 1-18.                                                                                                                                 |
|  |  |  |  |   |   |  | x |  | no, not journal | Siu-Man, N. D., & Leung, M. T. (2014, May). A path analytic model of Chinese-style achievement motivation, 3× 2 achievement goals and self-regulated learning of Hong Kong undergraduates. In 2014 Asian congress of applied psychology: Conference proceedings (pp. 292-319).                                                       |
|  |  |  |  | x |   |  |   |  | yes             | Méndez Giménez, A., García Romero, C., & Cecchini Estrada, J. A. (2018). 3x2 Achievement goals, friendship and affectivity in physical education: age-gender differences. Revista Internacional de Medicina y Ciencias de la Actividad Física y del Deporte, 18.                                                                     |
|  |  |  |  |   | x |  |   |  | dupe            | Yerdelen, S., & Padir, M. A. (2017). Öğretmenler için 3x2 başarı yönelimi ölçeği'nin Türkçeye uyarlanması: Geçerlilik-güvenirlilik çalışması. Bartın Üniversitesi Eğitim Fakültesi Dergisi, 6(3), 1027-1039.                                                                                                                         |
|  |  |  |  | x |   |  |   |  | yes             | Méndez-Giménez, A., Cecchini-Estrada, J. A., Fernández-Río, J., Saborit, J. A. P., & Méndez-Alonso, D. (2017). 3x2 classroom goal structures, motivational regulations, self-concept, and affectivity in secondary school. The Spanish Journal of Psychology, 20.                                                                    |
|  |  |  |  | x |   |  |   |  | yes             | So, C. Y., & Leung, M. T. (2016). Structural equation modeling of Chinese parenting predicting Hong Kong secondary school students' learning strategies with achievement emotions and achievement goals as mediators. In Applied Psychology: Proceedings of the 2015 Asian Congress of Applied Psychology (ACAP 2015) (pp. 220-238). |
|  |  |  |  | x |   |  |   |  | yes             | Øvretveit, K., Sæther, S. A., & Mehus, I. (2019). Mastery goals are associated with training effort in Brazilian jiu-jitsu.                                                                                                                                                                                                          |

|  |  |  |  |   |   |   |   |  |                 |                                                                                                                                                                                                                                                                         |
|--|--|--|--|---|---|---|---|--|-----------------|-------------------------------------------------------------------------------------------------------------------------------------------------------------------------------------------------------------------------------------------------------------------------|
|  |  |  |  |   |   |   | x |  | no, not journal | Thompson, K., Craig, B., Leventhal, B. C., & Horst, S. J. Let's Talk About Attitudes: What Predicts First-Year Oral Communication Competence?. SAT, 1(3.26), 208-87.                                                                                                    |
|  |  |  |  | x |   |   |   |  | yes             | Wu, C. C. (2022). Investigating the Discriminant Utility of Task-Based and Self-Based Goals in 3x2 Achievement Goal Model for Kindergarteners. Children, 9(11), 1765.                                                                                                   |
|  |  |  |  |   | x |   |   |  | dupe            | Méndez-Giménez, A., García-Romero, C., & Cecchini-Estrada, J. A. ACHIEVEMENT GOALS 3x2, FRIENDSHIP AND AFFECTIVITY IN PHYSICAL EDUCATION: AGE-GENDER DIFFERENCES METAS DE LOGRO 3x2, AMISTAD Y AFECTO EN EDUCACIÓN FÍSICA: DIFERENCIAS EDAD-SEXO.                       |
|  |  |  |  |   |   |   | x |  | no, not journal | Dudkina, A., & Klekmane, K. (2016, May). STUDENTS ACHIEVEMENT GOALS GENDER DIFFERENCES. In SOCIETY. INTEGRATION. EDUCATION. Proceedings of the International Scientific Conference (Vol. 1, pp. 320-330).                                                               |
|  |  |  |  | x |   |   |   |  | yes             | Didin, M., & Kasapoglu, K. (2021). Seventh Graders' Learning Strategies and Achievement Goal Orientations as Predictors of Their Achievement in Social Studies. International Journal of Progressive Education, 17(3), 361-380.                                         |
|  |  |  |  |   |   |   | x |  | no, not journal | Janse, R. (2016). Personality and achievement goals Relating the HEXACO Personality Factors to the 3 x 2 Achievement Goal Model (Master's thesis, University of Twente).                                                                                                |
|  |  |  |  |   | x |   |   |  | dupe            | Méndez-Giménez, A., García-Romero, C., & Cecchini-Estrada, J. A. EDUCACIÓN FÍSICA: DIFERENCIAS EDAD-SEXO.                                                                                                                                                               |
|  |  |  |  |   |   |   | x |  | no, not journal | Ansems, I. E. L. Mastery Motivation in Measurement Feedback.                                                                                                                                                                                                            |
|  |  |  |  |   | x |   |   |  | dupe            | García-Romero, C., Méndez-Giménez, A., & Cecchini-Estrada, J. A. METAS DE LOGRO 3X2 Y MEDIADORES PSICOLÓGICOS EN ESTUDIANTES DE EDUCACIÓN FÍSICA 3X2 ACHIEVEMENT GOALS AND PSYCHOLOGICAL MEDIATORS IN PHYSICAL EDUCATION STUDENTS.                                      |
|  |  |  |  | x |   |   |   |  | yes             | Hidayat, R., Zamri, S. N. A. S., & Zulnadi, H. (2018). Exploratory and confirmatory factor analysis of achievement goals for Indonesian students in mathematics education programmes. EURASIA Journal of Mathematics, Science and Technology Education, 14(12), em1648. |
|  |  |  |  |   |   | x |   |  | no, no 3x2      | Menon, R., & Mokhtar, A. H. (2017). Cross-Cultural Validation of the Achievement Goal Questionnaire for Sports: A Malaysian Adaptation. Available at SSRN 2924348.                                                                                                      |
|  |  |  |  |   |   | x |   |  | no, no 3x2      | O'Keefe, P. A., Ben-Eliyahu, A., & Linnenbrink-Garcia, L. (2013). Shaping achievement goal orientations in a mastery-structured environment and concomitant changes in related contingencies of self-worth. Motivation and emotion, 37(1), 50-64.                       |

|  |  |  |  |   |  |   |   |  |                  |                                                                                                                                                                                                                                                                                                            |
|--|--|--|--|---|--|---|---|--|------------------|------------------------------------------------------------------------------------------------------------------------------------------------------------------------------------------------------------------------------------------------------------------------------------------------------------|
|  |  |  |  |   |  | x |   |  | no, no 3x2       | Korn, R. M., & Elliot, A. J. (2016). The 2×2 standpoints model of achievement goals. <i>Frontiers in psychology</i> , 7, 742.                                                                                                                                                                              |
|  |  |  |  |   |  |   | x |  | no, not journal  | Hidayat, R., Zamri, S. N. A. S., Zulnaidi, H., & Yuanita, P. (2020). Achievement Goal for Indonesian Students of Mathematics Education Program: Issues of Gender and Academic Year Level. <i>Revolution</i> , 4, 492-498.                                                                                  |
|  |  |  |  | x |  |   |   |  | yes              | Hunsu, N., Oje, A. V., Jackson, A., & Olaogun, O. P. (2021). Examining Approach and Avoidance Valences of the 3 X 2 Achievement Goal Types on an Engineering Student Sample: A Validity Approach. <i>Frontiers in Psychology</i> , 12, 628004.                                                             |
|  |  |  |  |   |  |   | x |  | no, not journal  | Wilhelmsson, M. (2013). A personalized achievement system for educational games: Targeting the achievement goals of the student.                                                                                                                                                                           |
|  |  |  |  |   |  |   | x |  | no, not journal  | Awawdi, H. (2019). The Consequences of Promoting Mastery Goal Using Autonomy Supportive and Controlling Practices in the Classroom (Doctoral dissertation, University of Haifa (Israel)).                                                                                                                  |
|  |  |  |  | x |  |   |   |  | yes              | أنور عبد الغني, إ.، & محمد سعيد, ن. (2018). النمذجة السببية لتوجهات أهداف الإنجاز (النموذج ( والاندماج المعرفي والتحصيل الأكاديمي في ضوء متغيري النوع والتخصص. مجلة X2 السداسي 3 كلية التربية (أسبوط), 34(3), 83-1.                                                                                        |
|  |  |  |  | x |  |   |   |  | yes              | Gegenfurtner, A. (2019). Reconstructing goals for transfer of training in faculty development programs for higher education teachers: A qualitative documentary method approach. <i>Heliyon</i> , 5(11), e02928.                                                                                           |
|  |  |  |  |   |  | x |   |  | no, 2x2          | Miller, A. L. Achievement Goal Orientation as a Predictor of High-Impact Practice Participation for Postsecondary Students. <i>Mid-Western Educational Researcher</i> , 34(3), 223.                                                                                                                        |
|  |  |  |  |   |  |   | x |  | no, dissertation | D'Astous, E. G. (2016). An examination of Elliot's hierarchical model of approach and avoidance achievement motivation in athletes returning to sport following serious injury. The University of Utah.                                                                                                    |
|  |  |  |  |   |  | x |   |  | no, 2x2          | Oliver, E. M of interest in high-performance.                                                                                                                                                                                                                                                              |
|  |  |  |  | x |  |   |   |  | yes              | León-del-Barco, B., Mendo-Lázaro, S., Polo-del-Río, M. I., & Rasskin-Gutman, I. (2019). University Student's Academic Goals When Working in Teams: Questionnaire on Academic Goals in Teamwork, 3× 2 Model. <i>Frontiers in psychology</i> , 10, 2434.                                                     |
|  |  |  |  | x |  |   |   |  | yes              | Beretta, A., Zanetti, M. A., & Renati, R. (2013). Metacognizione, obiettivi di apprendimento e successo scolastico in studenti ad alto potenziale della scuola superiore. Metacognizione, obiettivi di apprendimento e successo scolastico in studenti ad alto potenziale della scuola superiore, 353-370. |
|  |  |  |  |   |  |   | x |  | no, thesis       | Mees, A., & Jonckheere, K. WANNEER LEADER-MEMBER EXCHANGE DE JOBTEVREDENHEID VERSTERKT: DE MODERERENDE ROL VAN ACHIEVEMENT GOAL ORIENTATION.                                                                                                                                                               |

|  |  |  |  |   |   |   |   |  |                    |                                                                                                                                                                                                                                                                        |
|--|--|--|--|---|---|---|---|--|--------------------|------------------------------------------------------------------------------------------------------------------------------------------------------------------------------------------------------------------------------------------------------------------------|
|  |  |  |  |   | x |   |   |  | dupe               | Cornillie, F., Lagatie, R., Vandewaetere, M., Clarebout, G., & Desmet, P. (2013). Tools that detectives use: in search of learner-related determinants for usage of optional feedback in a written murder mystery. <i>CALICO Journal</i> , 30, 22-45.                  |
|  |  |  |  |   |   | x |   |  | no, no 3x2         | Miller, A. L., & Speirs Neumeister, K. L. (2017). The influence of personality, parenting styles, and perfectionism on performance goal orientation in high ability students. <i>Journal of Advanced Academics</i> , 28(4), 313-344.                                   |
|  |  |  |  | x |   |   |   |  | yes                | Abercrombie, S., Bang, H., & Vaughan, A. (2022). Motivational and disciplinary differences in academic risk taking in higher education. <i>Educational Psychology</i> , 1-18.                                                                                          |
|  |  |  |  | x |   |   |   |  | yes                | Hidayat, R., Zulnaidi, H., & Syed Zamri, S. N. A. (2018). Roles of metacognition and achievement goals in mathematical modeling competency: A structural equation modeling analysis. <i>PloS one</i> , 13(11), e0206211.                                               |
|  |  |  |  |   |   |   |   |  | no, review article | Martin, A. J. (2015). Growth approaches to academic development: Research into academic trajectories and growth assessment, goals, and mindsets. <i>British Journal of Educational Psychology</i> , 85(2), 133-137.                                                    |
|  |  |  |  | x |   |   |   |  | yes                | Cornillie, F., & Desmet, P. (2013). <i>Seeking out fun failure: How positive failure feedback could enhance the instructional effectiveness of CALL mini-games. Global perspectives on Computer-Assisted Language Learning. Proceedings of WorldCALL 2013</i> , 64-68. |
|  |  |  |  |   |   |   | x |  | no, thesis         | Tsai, H. J. (2015). Exploring college students' motivational beliefs in ability-grouped English classes in Taiwan (Doctoral dissertation, Durham University).                                                                                                          |
|  |  |  |  |   |   |   | x |  | no, thesis         | Özuzun, Y. B. (2018). Differentiation of dual motivational system in deviance regulation theory by achievement goal orientations (Master's thesis, Middle East Technical University).                                                                                  |
|  |  |  |  |   |   | x |   |  | no, no 3x2         | Holden, S. M., Mueller, C. E., Harrell-Williams, L. M., Ford, J. M., & Jones, M. H. (2021). Comparison of motivational latent profiles using the PALS and AGQ-R. <i>Contemporary Educational Psychology</i> , 67, 101999.                                              |
|  |  |  |  | x |   |   |   |  | yes                | Méndez-Giménez, A., Cecchini-Estrada, J. A., & Fernández-Río, J. (2014). Examinando el modelo de metas de logro 3x2 en el contexto de la Educación Física. <i>Cuadernos de Psicología del Deporte</i> , 14(3), 157-168.                                                |
|  |  |  |  | x |   |   |   |  | yes                | Lower-Hoppe, L. M., Evans, J. O., & Brgoch, S. M. (2021). Examining the social cognitive determinants of collegiate recreational sport involvement and outcomes. <i>Leisure/Loisir</i> , 45(2), 207-236.                                                               |
|  |  |  |  |   |   |   | x |  | no, not journal    | Bernardo, A. B. (2018). Sociocultural dimensions of student motivation: Research approaches and insights from the Philippines. <i>Asian Education Miracles</i> , 139-154.                                                                                              |

|  |  |  |  |   |   |   |   |   |                            |                                                                                                                                                                                                                                                                                                                                       |
|--|--|--|--|---|---|---|---|---|----------------------------|---------------------------------------------------------------------------------------------------------------------------------------------------------------------------------------------------------------------------------------------------------------------------------------------------------------------------------------|
|  |  |  |  |   |   |   | x |   | no, not journal            | Parton, L. B. N. (2016). THE RELATIONSHIP BETWEEN SERVANT LEADER COACH BEHAVIORS AND ACHIEVEMENT GOALS IN COLLEGIATE TENNIS PLAYERS: THE MEDIATINGEFFECT OF MOTIVATIONAL CLIMATE.                                                                                                                                                     |
|  |  |  |  |   |   | x |   |   | no, no 3x2                 | Dekker, S., Krabbendam, L., Lee, N., Boschloo, A., De Groot, R., & Jolles, J. (2016). Dominant goal orientations predict differences in academic achievement during adolescence through metacognitive self-regulation. <i>Journal of Educational and Developmental Psychology</i> , 6(1), 47-58.                                      |
|  |  |  |  |   |   |   | x |   | no, not journal            | Hollis, R. B. (2013). Mind wandering and online learning: A latent variable analysis. Kent State University.                                                                                                                                                                                                                          |
|  |  |  |  |   |   |   | x |   | no, not journal            | Lowe, A. N. (2020). Identity Safety and Its Importance for Academic Success. <i>Handbook on promoting social justice in education</i> , 1849-1881.                                                                                                                                                                                    |
|  |  |  |  |   |   | x |   |   | no, no 3x2                 | Woldemichael, B. B., Semela, T., & Tulu, A. (2022). THE EFFECT MASTERY AND PERFORMANCE RELATED MATHEMATICS LEARNING MOTIVATION ON MATHEMATICS ACHIEVEMENT: THE CASE OF FIRST YEAR UNDERGRADUATE UNIVERSITY STUDENTS IN BONGA UNIVERSITY, ETHIOPIA. <i>International Journal of Education, Technology and Science</i> , 2(4), 429-454. |
|  |  |  |  |   |   |   |   | x | no, not correct use of 3x2 | Putwain, D., Symes, W., Nicholson, L., & Becker, S. Achievement goals, behavioural engagement, and mathematics achievement.                                                                                                                                                                                                           |
|  |  |  |  | x |   |   |   |   | yes                        | Hidayat, R., Zamri, S. N. A. S., & Zulnaidi, H. (2018). Does mastery of goal components mediate the relationship between metacognition and mathematical modelling competency?. <i>Educational Sciences: Theory &amp; Practice</i> , 18(3).                                                                                            |
|  |  |  |  |   | x |   |   |   | dupe                       | Méndez-Giménez, A., García-Romero, C., & Cecchini-Estrada, J. A. (2018). Metas de logro 3x2, amistad y afecto en educación física: Diferencias edad-sexo. <i>Revista Internacional de Medicina y Ciencias de la Actividad Física y el Deporte</i> .                                                                                   |
|  |  |  |  | x |   |   |   |   | yes                        | García Romero, C., Méndez Giménez, A., & Cecchini Estrada, J. A. (2020). Papel predictivo de las metas de logro 3x2 sobre la necesidad de autonomía en Educación Física. <i>Sportis-Scientific Technical Journal Of School Sport Physical Education And Psychomotricity</i> , 6.                                                      |
|  |  |  |  | x |   |   |   |   | yes                        | الملاحه, ح. (2020). الذكاء الناجح و توجهات أهداف الانجاز كمنبئات باستراتيجيات مواجهة الضغوط الأكاديميكلدى طلبة الكليات الطبية مرتفعي و منخفضي التحصيل. مجلة جامعة الفيوم للعلوم التربوية والنفسية, 14(10), 127-63.                                                                                                                    |
|  |  |  |  | x |   |   |   |   | yes                        | Leenknecht, M., Hompus, P., & van der Schaaf, M. (2019). Feedback seeking behaviour in higher education: the association with students' goal orientation and deep learning approach. <i>Assessment &amp; Evaluation in Higher Education</i> , 44(7), 1069-1078.                                                                       |

|  |  |  |  |  |   |   |   |                           |                                                                                                                                                                                                                                                               |
|--|--|--|--|--|---|---|---|---------------------------|---------------------------------------------------------------------------------------------------------------------------------------------------------------------------------------------------------------------------------------------------------------|
|  |  |  |  |  |   |   | x | no, review article        | Durmić, A. (2020). Achievement Goals: Conceptual Models and Results of Researching the Outcomes. Croatian Journal of Education: Hrvatski časopis za odgoj i obrazovanje, 22(1), 115-141.                                                                      |
|  |  |  |  |  |   |   | x | no, conference proceeding | Biddle, E., Lameier, E., Reinerman-Jones, L., Matthews, G., & Boyce, M. (2018, May). Personality: A key to Motivating our Learners. In 6th Annual GIFT Users Symposium (pp. 9-11).                                                                            |
|  |  |  |  |  |   |   | x | no, not journal           | Delrue, J. (2018). Towards a more refined and integrative view on athletes' motivation and coaches' motivating style (Doctoral dissertation, Ghent University).                                                                                               |
|  |  |  |  |  |   |   | x | no, no quantitative data  | Irvine, J. (2018). A Framework for Comparing Theories Related to Motivation in Education. Research in Higher Education Journal, 35.                                                                                                                           |
|  |  |  |  |  |   |   | x | no, thesis                | Porras Rojas, P. S. (2021). Escala metas de logro 3x2 en estudiantes de secundaria de un colegio de Lima Metropolitana: evidencias de validez y confiabilidad.                                                                                                |
|  |  |  |  |  | x |   |   | dupe                      | Никитская, М. Г., & Углонова, И. Л. (2021). Русскоязычная версия опросника целей учебных достижений: разработка, валидизация и исследование функциональных возможностей. Психологическая наука и образование, 26(5).                                          |
|  |  |  |  |  | x |   |   | dupe                      | García-Romero, C., Méndez-Giménez, A., & Cecchini-Estrada, J. A. (2021). Metas de logro 3x2 y mediadores psicológicos en estudiantes de educación física. Revista Internacional de Medicina y Ciencias de la Actividad Física y del Deporte, 22(87), 455-469. |
|  |  |  |  |  |   |   | x | thesis                    | Hannan, G. V. (2016). Girls' perceptions of challenging work and the factors that motivate them to engage with challenging work within the selective independent sector (Doctoral dissertation, UCL (University College London)).                             |
|  |  |  |  |  |   | x |   | no, no 3x2                | ALPARSLAN, A., ÖZKUL, A. S., & ERHAN, T. (2021). Düşünme İhtiyacı-Uсталık Yönelimi-Psikolojik İyi Oluş İlişkisi: Eğitimciler Üzerinde Bir İnceleme. Yönetim Bilimleri Dergisi, 19(42), 969-990.                                                               |
|  |  |  |  |  |   |   | x | no, no quantitative data  | Короткевич, Э. Р. (2019). Учебная мотивация современного студента в контексте теории достижения целей. Образовательные ресурсы и технологии, (3 (28)), 27-32.                                                                                                 |
|  |  |  |  |  |   |   | x | thesis                    | Marjanovic, M. (2014). The relationships between achievement goals, motivational climate and self-talk in physical education (Master's thesis).                                                                                                               |
|  |  |  |  |  |   |   | x | thesis                    | Kamarova, S. (2016). On the social nature of competence evaluations: Do task-involved individuals compare themselves to others? (Doctoral dissertation, Curtin University).                                                                                   |

|  |  |  |  |   |   |   |   |   |              |                                                                                                                                                                                                                                                                                                                                                 |
|--|--|--|--|---|---|---|---|---|--------------|-------------------------------------------------------------------------------------------------------------------------------------------------------------------------------------------------------------------------------------------------------------------------------------------------------------------------------------------------|
|  |  |  |  | x |   |   |   |   | yes          | مصطفى، ف. م. م.، & فتحى محمد محمود. (2021). توجهات أهداف الانجاز (3 × 2) كمنبئات بالسلوكيات الأكاديمية المرتبطة بالوقت لدى طلاب جامعة القصيم. مجلة كلية التربية بالمنصورة، 795-749، (2)116.                                                                                                                                                     |
|  |  |  |  |   |   |   | x |   | citation     | Nikitskaya, M. G. (2019). Study on Achievement Goals and Directionality in the Context of Learning Motivation. Journal: Современная зарубежная психология Journal of Modern Foreign Psychology, (2), 26-35.                                                                                                                                     |
|  |  |  |  |   | x |   |   |   | dupe         | Méndez-Giménez, A., García-Romero, C., & Cecchini-Estrada, J. A. METAS DE LOGRO 3x2, AMISTAD Y AFECTO EN EDUCACIÓN FÍSICA: DIFERENCIAS EDAD-SEXO ACHIEVEMENT GOALS 3x2, FRIENDSHIP AND AFFECTIVITY IN PHYSICAL EDUCATION: AGE-GENDER DIFFERENCES.                                                                                               |
|  |  |  |  |   |   | x |   |   | no, no 3x2   | Madjar, N., Ratelle, C. F., & Duchesne, S. (2021). A longitudinal analysis of the relationships between students' internalized symptoms and achievement goals. Motivation Science.                                                                                                                                                              |
|  |  |  |  |   |   |   | x |   | citation     | Quick, J. M. 1. Leveraging Proven Research in Educational Game Design.                                                                                                                                                                                                                                                                          |
|  |  |  |  | x |   |   |   |   | yes          | Romero, C. G. (2022). Relación entre las metas de logro 3x2, las necesidades psicológicas básicas y la inteligencia emocional en estudiantes de Educación Física. In Congreso EDUCA 2022: Ebook de Actas. 5ª Congreso Mundial de Educación 24-26 de febrero, 2022 (pp. 423-425). Campus Educa-Sportis.                                          |
|  |  |  |  |   |   | x |   |   | no 3x2       | Josefsson, T., Ivarsson, A., Gustafsson, H., Stenling, A., Lindwall, M., Tornberg, R., & Böröy, J. (2019). Effects of mindfulness-acceptance-commitment (MAC) on sport-specific dispositional mindfulness, emotion regulation, and self-rated athletic performance in a multiple-sport population: an RCT study. Mindfulness, 10(8), 1518-1529. |
|  |  |  |  |   |   | x |   |   | no, no 3x2   | Bipp, T., Kleingeld, A., & Schelp, L. (2021). Achievement goals and goal progress as drivers of work engagement. Psychological Reports, 124(5), 2180-2202.                                                                                                                                                                                      |
|  |  |  |  |   |   |   | x |   | thesis       | Berger, N. (2013). Exploring the motivational goals of Preliminary HSC students from divergent socioeconomic backgrounds. Unpublished master's thesis), The University of Newcastle, Callaghan, Australia. <a href="https://doi.org/10.13140/2.1.2044">https://doi.org/10.13140/2.1.2044</a> .                                                  |
|  |  |  |  |   |   |   |   | x | review       | Espínola, C. F., & Torres, B. J. A. (2019). Relación entre motivación e inteligencia emocional en Educación Física: una revisión sistemática. Retos: nuevas tendencias en educación física, deporte y recreación, (36), 584-589.                                                                                                                |
|  |  |  |  |   |   |   | x |   | book chapter | Sage, L. (2017). Motivated Attention in the Multicultural Classroom. In Paradoxes in Education (pp. 69-84). Brill.                                                                                                                                                                                                                              |
|  |  |  |  |   |   | x |   |   | no, no 3x2   | Suárez-Valenzuela, S., & Suárez Riveiro, J. M. (2022). Academic goals, parenting styles, and their relationship to learning strategies in                                                                                                                                                                                                       |



|       |                                  |           |           |   |   |   |   |   |                    |                                                                                                                                                                                                                                                                                               |
|-------|----------------------------------|-----------|-----------|---|---|---|---|---|--------------------|-----------------------------------------------------------------------------------------------------------------------------------------------------------------------------------------------------------------------------------------------------------------------------------------------|
|       |                                  |           |           |   |   |   |   |   |                    | compulsory secondary education. Electronic Journal of Research in Educational Psychology, 20(56).                                                                                                                                                                                             |
|       |                                  |           |           | x |   |   |   |   | yes                | GEZER, M., & ŞAHİN, İ. F. (2016). Sosyal bilgiler odaklı başarı yönelimleri ölçeği (sobyö): geçerlik ve güvenirlik çalışması. Journal of Measurement and Evaluation in Education and Psychology, 7(2), 335-354.                                                                               |
|       |                                  |           |           |   |   |   |   | x | no data            | Никитская, М. Г. (2019). Исследования целей достижения и направленности в контексте учебной мотивации. Современная зарубежная психология, 8(2), 26-35.                                                                                                                                        |
|       |                                  |           |           |   |   | x |   |   | no, no 3x2         | Pereira, P., Santos, F., & Marinho, D. A. (2022). Portuguese Students' Perceptions About the Motivational Climate in Physical Education. Journal of Teaching in Physical Education, 1(aop), 1-10.                                                                                             |
|       |                                  |           |           |   |   | x |   |   | no, no 3x2         | Bardach, L., Lüftenegger, M., Oczlon, S., Spiel, C., & Schober, B. (2020). Context-related problems and university students' dropout intentions—the buffering effect of personal best goals. European Journal of Psychology of Education, 35(2), 477-493.                                     |
|       |                                  |           |           |   |   | x |   |   | no, no 3x2         | León-del-Barco, B., Mendo-Lázaro, S., Iglesias Gallego, S., Polo-del-Río, M. I., & Iglesias Gallego, D. (2020). Academic goals and parental control in primary school children. International Journal of Environmental Research and Public Health, 17(1), 206.                                |
|       |                                  |           |           |   |   |   | x |   | no, not study      | Park, S., & Matsuda, N. (2018, May). Predicting students' unproductive failure on intelligent tutors in adaptive online courseware. In Proceedings of the Sixth Annual GIFT Users Symposium (Vol. 6, p. 131). US Army Research Laboratory.                                                    |
|       |                                  |           |           |   |   |   | x |   | no, book           | Tempelaar, D. (2023). Incorporating Time in Dispositional Learning Analytics Models. In Open and Inclusive Educational Practice in the Digital World (pp. 29-45). Springer, Cham.                                                                                                             |
|       | Achievement goal model and sport | 2011-2013 |           |   |   |   |   | x | no, not emprirical | Vansteenkiste, M., Lens, W., Elliot, A. J., Soenens, B., Mouratidis, A., & Vansteenkiste, M. (2014). Moving the achievement goal approach one step forward: Towards a systematic examination of the reasons underlying achievement goals. Educational Psychologist, 49, 153-174.              |
|       |                                  |           |           | x |   |   |   |   | yes                | Alasqah, S. S. (2022). Goal Orientation and Its Impact on University Students' Academic Achievement During the COVID-19 Pandemic. SAGE Open, 12(2), 21582440221093617.                                                                                                                        |
| EBSCO | 3x2 achievement goal model       | anytime   | relevance |   |   |   |   |   |                    |                                                                                                                                                                                                                                                                                               |
|       |                                  |           |           |   | x |   |   |   | dupe               | Thomas, C. L. (2022). Predicting Test Anxiety Using the 3x2 Achievement Goal Model. International Journal of School & Educational Psychology, 10(2), 232-242.                                                                                                                                 |
|       |                                  |           |           |   | x |   |   |   | dupe               | Thomas, C. L. (2021). Predicting test anxiety using the 3x2 achievement goal model. International Journal of School & Educational Psychology. <a href="https://doi-org.lib-e2.lib.ttu.edu/10.1080/21683603.2020.1816237">https://doi-org.lib-e2.lib.ttu.edu/10.1080/21683603.2020.1816237</a> |

|  |                       |  |  |   |   |  |  |  |               |                                                                                                                                                                                                                                                                                                                                                                         |
|--|-----------------------|--|--|---|---|--|--|--|---------------|-------------------------------------------------------------------------------------------------------------------------------------------------------------------------------------------------------------------------------------------------------------------------------------------------------------------------------------------------------------------------|
|  |                       |  |  |   | x |  |  |  | dupe          | Lower, L. M., Newman, T. J., & Pollard, W. S. (2016). Examination of the 3x2 Achievement Goal Model in Recreational Sport: Associations with Perceived Benefits of Sport Participation. <i>International Journal of Sport Management, Recreation &amp; Tourism</i> , 26, 44–53.                                                                                         |
|  |                       |  |  |   | x |  |  |  | dupe, spanish | Méndez-Giménez, A., Cecchini-Estrada, J.-A., & Fernández-Río, J. (2014). Examinando el modelo de metas de logro 3x2 en el contexto de la Educación Física. / Examining the 3x2 Achievement Goal Model in the Physical Education context. <i>Cuadernos de Psicología Del Deporte</i> , 14(3), 157–167.                                                                   |
|  |                       |  |  |   | x |  |  |  | dupe          | Üztemur, S. (2020). Achievement Goals and Learning Approaches in the Context of Social Studies Teaching: Comparative Analysis of 3x2 and 2x2 Models. <i>Participatory Educational Research</i> , 7(2), 1–18.                                                                                                                                                            |
|  | 3x2 achievement goal* |  |  |   | x |  |  |  | dupe          | Thomas, C. L. (2022). Predicting Test Anxiety Using the 3x2 Achievement Goal Model. <i>International Journal of School &amp; Educational Psychology</i> , 10(2), 232–242.                                                                                                                                                                                               |
|  |                       |  |  |   | x |  |  |  | dupe          | Cecchini, J.-A., Méndez-Giménez, A., & García-Romero, C. (2021). Intra-individual changes in 3x2 achievement goals, friendship goals, motivational regulations and consequences in physical education. <i>Revista Latinoamericana de Psicología</i> , 53.                                                                                                               |
|  |                       |  |  |   | x |  |  |  | dupe          | Méndez-Giménez, A., García-Romero, C., & Cecchini-Estrada, J. A. (2018). 3x2 ACHIEVEMENT GOALS, FRIENDSHIP AND AFFECTIVITY IN PHYSICAL EDUCATION: AGE-GENDER DIFFERENCES. / METAS DE LOGRO 3x2, AMISTAD Y AFECTO EN EDUCACIÓN FÍSICA: DIFERENCIAS EDAD-SEXO. <i>Revista Internacional de Medicina y Ciencias de La Actividad Física y Del Deporte</i> , 18(72), 637–653 |
|  |                       |  |  |   | x |  |  |  | dupe          | Thomas, C. L. (2021). Predicting test anxiety using the 3x2 achievement goal model. <i>International Journal of School &amp; Educational Psychology</i> . <a href="https://doi-org.lib-e2.lib.ttu.edu/10.1080/21683603.2020.1816237">https://doi-org.lib-e2.lib.ttu.edu/10.1080/21683603.2020.1816237</a>                                                               |
|  |                       |  |  |   | x |  |  |  | dupe          | Lower, L. M., Newman, T. J., & Pollard, W. S. (2016). Examination of the 3x2 Achievement Goal Model in Recreational Sport: Associations with Perceived Benefits of Sport Participation. <i>International Journal of Sport Management, Recreation &amp; Tourism</i> , 26, 44–53.                                                                                         |
|  |                       |  |  | x |   |  |  |  | yes           | Romero, C. G. (2021). Estudio longitudinal y transversal de metas de logro 3x2 y autodeterminación en el contexto de la educación física. / Longitudinal and Cross-Sectional Study of 3x2 Achievement Goals and Self-Determination in the Physical Education Setting. <i>Apuntes: Educacion Fisica y Deportes</i> , 144, 81–84.                                         |
|  |                       |  |  | x |   |  |  |  | yes           | Méndez-Giménez, A., Cecchini, J. A., & García-Romero, C. (2018). Metas de Logro 3x2, Inteligencia Emocional y Relaciones Sociales en el Contexto de la Educación Física = 3x2 achievement goals, emotional intelligence and social relationship in the context of physical education. <i>Revista</i>                                                                    |

|  |                                     |  |  |   |   |   |  |  |      |                                                                                                                                                                                                                                                                                                                                                                                                                                 |
|--|-------------------------------------|--|--|---|---|---|--|--|------|---------------------------------------------------------------------------------------------------------------------------------------------------------------------------------------------------------------------------------------------------------------------------------------------------------------------------------------------------------------------------------------------------------------------------------|
|  |                                     |  |  |   |   |   |  |  |      | Iberoamericana de Diagnóstico y Evaluación Psicológica, 49(4), 131–141. <a href="https://doi-org.lib-e2.lib.ttu.edu/10.21865/RIDEP49.4.11">https://doi-org.lib-e2.lib.ttu.edu/10.21865/RIDEP49.4.11</a>                                                                                                                                                                                                                         |
|  |                                     |  |  |   | x |   |  |  | dupe | Méndez-Giménez, A., Cecchini-Estrada, J.-A., & Fernández-Río, J. (2014). Examinando el modelo de metas de logro 3x2 en el contexto de la Educación Física. / Examining the 3x2 Achievement Goal Model in the Physical Education context. Cuadernos de Psicología Del Deporte, 14(3), 157–167.                                                                                                                                   |
|  |                                     |  |  | x |   |   |  |  | yes  | Méndez-Giménez, A., Cecchini, J.-A., Méndez-Alonso, D., Prieto, J.-A., & Fernández-Río, J. (2018). Effect of 3x2 achievement goals and classroom goal structures on self-determined motivation: A multilevel analysis in secondary education. Anales de Psicología, 34(1), 52–62. <a href="https://doi-org.lib-e2.lib.ttu.edu/10.6018/analesps.34.1.262131">https://doi-org.lib-e2.lib.ttu.edu/10.6018/analesps.34.1.262131</a> |
|  |                                     |  |  |   | x |   |  |  | dupe | García Romero, C., Méndez-Giménez, A., & Antonio Cecchini-Estrada, J. (2021). Longitudinal and Cross-Sectional Study of 3x2 Achievement Goals and Self-Determination in the Physical Education Setting. Apunts: Educació Física i Esports, 144, 83.                                                                                                                                                                             |
|  |                                     |  |  |   | x |   |  |  | dupe | ØVRETVEIT, K., SÆTHER, S. A., & MEHUS, I. (2019). Mastery goals are associated with training effort in Brazilian jiu-jitsu. Journal of Physical Education & Sport, 19, 1294–1299.                                                                                                                                                                                                                                               |
|  |                                     |  |  |   | x |   |  |  | dupe | Üztemur, S. (2020). Achievement Goals and Learning Approaches in the Context of Social Studies Teaching: Comparative Analysis of 3x2 and 2x2 Models. Participatory Educational Research, 7(2), 1–18.                                                                                                                                                                                                                            |
|  |                                     |  |  | x |   |   |  |  | yes  | Karahan, B. Ü. (2018). Examining the Relationship between the Achievement Goals and Teacher Engagement of Turkish Teachers. Journal of Education and Training Studies, 6(3), 101–107.                                                                                                                                                                                                                                           |
|  |                                     |  |  | x |   |   |  |  | yes  | Zhou, M., Teo, T., & Hoi, C. K. W. (2022). Validation of a simplified Chinese version of the 3 × 2 Achievement Goal Questionnaire (AGQ-S). Journal of General Psychology, 149(1), 116–137. <a href="https://doi-org.lib-e2.lib.ttu.edu/10.1080/00221309.2020.1803194">https://doi-org.lib-e2.lib.ttu.edu/10.1080/00221309.2020.1803194</a>                                                                                      |
|  |                                     |  |  | x |   |   |  |  | yes  | Gillet, N., Lafrenière, M.-A., Huyghebaert, T., & Fouquereau, E. (2015). Autonomous and controlled reasons underlying achievement goals: Implications for the 3 × 2 achievement goal model in educational and work settings. Motivation & Emotion, 39(6), 858–875. <a href="https://doi-org.lib-e2.lib.ttu.edu/10.1007/s11031-015-9505-y">https://doi-org.lib-e2.lib.ttu.edu/10.1007/s11031-015-9505-y</a>                      |
|  | hand-search<br>Gillet<br>references |  |  |   |   | x |  |  | no   | Bonneville-Roussy, A., Lavigne, G. L., & Vallerand, R. J. (2011). When passion leads to excellence: The case of musicians. Psychology of Music, 39(1), 123–138. <a href="https://doi-org.lib-e2.lib.ttu.edu/10.1177/0305735609352441">https://doi-org.lib-e2.lib.ttu.edu/10.1177/0305735609352441</a>                                                                                                                           |
|  |                                     |  |  |   |   | x |  |  | no   | Hill, A., Tan, A.-G., & Kikuchi, A. (2008). International high school students' perceived creativity self-efficacy. Korean Journal of Thinking & Problem Solving, 18(1), 105–115.                                                                                                                                                                                                                                               |
|  |                                     |  |  |   |   | x |  |  | no   | Ehrlich, C., & Bipp, T. (2016). Goals and subjective well-being: Further evidence for goal-striving reasons as an additional level of goal analysis.                                                                                                                                                                                                                                                                            |

|                             |                    |           |       |    |    |    |    |                |                                                                                                                                                                                                                                                                                                                                                   |
|-----------------------------|--------------------|-----------|-------|----|----|----|----|----------------|---------------------------------------------------------------------------------------------------------------------------------------------------------------------------------------------------------------------------------------------------------------------------------------------------------------------------------------------------|
|                             |                    |           |       |    |    |    |    |                | Personality and Individual Differences, 89, 92–99. <a href="https://doi-org.lib-e2.lib.ttu.edu/10.1016/j.paid.2015.10.001">https://doi-org.lib-e2.lib.ttu.edu/10.1016/j.paid.2015.10.001</a>                                                                                                                                                      |
|                             |                    |           |       |    |    | x  |    | no             | Gaudreau, P. (2012). Goal self-concordance moderates the relationship between achievement goals and indicators of academic adjustment. <i>Learning and Individual Differences</i> , 22(6), 827–832. <a href="https://doi-org.lib-e2.lib.ttu.edu/10.1016/j.lindif.2012.06.006">https://doi-org.lib-e2.lib.ttu.edu/10.1016/j.lindif.2012.06.006</a> |
|                             | knew first article |           |       | x  |    |    |    | hand picked    | Elliot, A. J., & Kou, M. Pekrun Reinhard,(2011).“A 3x2 achievement goal model”. <i>Journal of Educational Psychology</i> , 1033, 632-648.                                                                                                                                                                                                         |
| EBSCO                       | AGQ-S              | 2011-2023 |       |    |    | x  |    | 2x2            | Jang, Hyun Sung. (n.d.). Investigating mastery-avoidance goals using the achievement goal questionnaire for sports (agq-s): A meta-analytic confirmatory factor analysis (ma-cfa). <i>Current Psychology : Research &amp; Reviews</i> . <a href="https://doi.org/10.1007/s12144-022-03768-7">https://doi.org/10.1007/s12144-022-03768-7</a>       |
|                             |                    |           |       |    | x  |    |    | dupe           | Zhou, M., Teo, T., & Hoi, C. K. W. (2022). Validation of a simplified Chinese version of the 3× 2 Achievement Goal Questionnaire (AGQ-S). <i>The Journal of General Psychology</i> , 149(1), 116-137.                                                                                                                                             |
|                             |                    |           |       | x  |    |    |    | yes            | Danthoni, S., Mascet, N., & Cury, F. (2021). The relationships between the 3× 2 achievement goal model and test anxiety in Physical Education. <i>European Physical Education Review</i> , 27(3), 559-573.                                                                                                                                        |
|                             |                    |           |       | x  |    |    |    | yes            | Kovács, K., Gyömbér, N., Kelemen, Á., & Fodorné Földi, R. (2019). Az észlelt autonómiatámogatás hatása a teljesítéscélokra karate utánpótláskorosztályoknál. <i>Magyar Pszichológiai Szemle</i> , 74(2), 163-180.                                                                                                                                 |
|                             |                    |           |       |    | x  |    |    | dupe           | Øvretveit, K., & Mehus, I. (2019). Mastery goals are associated with training effort in Brazilian jiu-jitsu. <i>Journal of Physical Education and Sport</i> , 19, 1294-1299.                                                                                                                                                                      |
|                             |                    |           |       |    |    | x  |    | 2x2            | Bono, B., & Livi, S. (2016). Motivazione al successo in atleti di élite: applicazione del 2X2 Achievement Goal Framework nel nuoto. <i>Rassegna di Psicologia</i> .                                                                                                                                                                               |
|                             |                    |           |       |    |    | x  |    | 2x2            | Fernandez-Rio, J., Cecchini Estrada, J. A., Mendez-Gimenez, A., Fernandez-Garcia, B., & Saavedra, P. (2014). 2× 2 Dominant achievement goal profiles in high-level swimmers. <i>European Journal of Sport Science</i> , 14(3), 265-272.                                                                                                           |
|                             |                    |           |       |    |    | x  |    | 2x2            | Duff-Riddell, C., & Louw, J. (2011). Achievement goal profiles, trait-anxiety and state-emotion of young female competitive horse riders. <i>South African Journal for Research in Sport, Physical Education and Recreation</i> , 33(3), 37-49.                                                                                                   |
|                             |                    |           |       | x  |    |    |    | yes            | Mascet, N., Elliot, A. J., & Cury, F. (2015). Extending the 3× 2 achievement goal model to the sport domain: The 3× 2 Achievement Goal Questionnaire for Sport. <i>Psychology of Sport and Exercise</i> , 17, 7-14.                                                                                                                               |
|                             |                    |           | total | 46 | 25 | 27 | 28 | 7              |                                                                                                                                                                                                                                                                                                                                                   |
| M.L. and C.S. hand searched |                    |           |       |    |    |    |    | short citation | Long citation                                                                                                                                                                                                                                                                                                                                     |

|                     |  |  |  |  |  |  |  |  |                               |                                                                                                                                                                                                                                                                                                            |
|---------------------|--|--|--|--|--|--|--|--|-------------------------------|------------------------------------------------------------------------------------------------------------------------------------------------------------------------------------------------------------------------------------------------------------------------------------------------------------|
|                     |  |  |  |  |  |  |  |  | García-Romero et al., 2015    | García-Romero, C. Relationship between the 3x2 achievement goals and perceived competence in Physical Education students Relación entre las metas de logro 3x2 y la competencia percibida en los estudiantes de Educación Física.                                                                          |
|                     |  |  |  |  |  |  |  |  | Ileri et al., 2021            | Anthony, M., Cecilia, N., Elizabeth, W., & Stephen, K. (2020). Achievement goal orientations as predictors of academic achievement among secondary school students in embu county, kenya. <i>J Sch Cogn Psychol</i> . DOI, 10, 2329-8901.                                                                  |
|                     |  |  |  |  |  |  |  |  | Kilicoglu, 2019               | Kiliçoğlu, G. (2019). A Study on the Relationship between Achievement Goal Orientations of Secondary School Students to Social Studies and Self-Regulation Strategies They Use. <i>Journal of Education and E-Learning Research</i> , 6(1), 38-44.                                                         |
|                     |  |  |  |  |  |  |  |  | Mascet et al., 2022           | Mascet, N., Vors, O., Marqueste, T., & Cury, F. (2022). Stress Responses, Competition, and Free-Throw Performance: The Predicting Role of Other-Approach Goals. <i>Psychological Reports</i> , 125(6), 3049-3068.                                                                                          |
|                     |  |  |  |  |  |  |  |  | Méndez-Giménez et al., 2017 B | Giménez, A. M., Estrada, J. A. C., Río, J. F., Alonso, D. M., & Saborit, J. A. P. (2017). 3x2 Achievement Goals, Self-Determined Motivation and Life Satisfaction in Secondary Education. <i>Revista de psicodidáctica</i> , 22(2), 5.                                                                     |
|                     |  |  |  |  |  |  |  |  | Rivera Pérez et al., 2021 A   | Rivera-Pérez, S., Fernandez-Rio, J., & Iglesias Gallego, D. (2021). Effects of an 8-week cooperative learning intervention on physical education students' task and self-approach goals, and emotional intelligence. <i>International Journal of Environmental Research and Public Health</i> , 18(1), 61. |
|                     |  |  |  |  |  |  |  |  | Rivera Pérez et al., 2021 B   | Rivera-Pérez, S., Fernandez-Rio, J., & Gallego, D. I. (2021). Uncovering the nexus between cooperative learning contexts and achievement goals in physical education. <i>Perceptual and Motor Skills</i> , 128(4), 1821-1835.                                                                              |
|                     |  |  |  |  |  |  |  |  | Rivera Pérez et al., 2021 C   | Pérez, S. R., del Barco, B. L., Bernal, J. J. G., & Gallego, D. I. (2021). Cooperative learning and approach goals in physical education: The discriminant role of individual accountability. <i>Revista de Psicodidáctica (English Ed.)</i> , 26(1), 78-85.                                               |
|                     |  |  |  |  |  |  |  |  | Sari et al., 2019             | Sari, N. E. P., Sugiyo, S., & Sunawan, S. (2019). Achievement Goal and Homework Behavior: Mediator Effects of Achievement Emotion. <i>Jurnal Bimbingan Konseling</i> , 8(3), 56-64.                                                                                                                        |
|                     |  |  |  |  |  |  |  |  | Yang & Cao, 2013              | Yang, Y., & Cao, L. (2013). Differential influences of achievement approach goals and intrinsic/extrinsic motivation on help-seeking in e-learning. <i>Knowledge Management &amp; E-Learning</i> , 5(2), 153.                                                                                              |
|                     |  |  |  |  |  |  |  |  |                               |                                                                                                                                                                                                                                                                                                            |
| Wu, 2022 references |  |  |  |  |  |  |  |  | Cowden et al., 2021           | Cowden, R. G., Mascet, N., & Duckett, T. R. (2021). A person-centered approach to achievement goal orientations in competitive tennis players: Associations with motivation and mental toughness. <i>Journal of sport and health science</i> , 10(1), 73-81.                                               |

|                  |  |  |  |  |  |  |  |  |                                         |                                                                                                                                                                                                                                                                        |
|------------------|--|--|--|--|--|--|--|--|-----------------------------------------|------------------------------------------------------------------------------------------------------------------------------------------------------------------------------------------------------------------------------------------------------------------------|
|                  |  |  |  |  |  |  |  |  | Diseth et al., 2015                     | Diseth, Å. (2015). The advantages of task-based and other-based achievement goals as standards of competence. <i>International Journal of Educational Research</i> , 72, 59-69.                                                                                        |
|                  |  |  |  |  |  |  |  |  | Ning, 2018                              | Ning, H. K. (2018). Psychometric properties of the 3×2 Achievement Goal Questionnaire in a Hong Kong sample. <i>Journal of Psychoeducational Assessment</i> , 36(3), 261-272.                                                                                          |
|                  |  |  |  |  |  |  |  |  | Mascaret et al., 2015 B                 | Mascaret, N., Elliot, A. J., & Cury, F. (2015). The 3×2 achievement goal questionnaire for teachers. <i>Educational psychology</i> , 37(3), 346-361.                                                                                                                   |
|                  |  |  |  |  |  |  |  |  | Shen et al., 2020                       | Shen, L., Lee, J., Chen, C., & Zhang, T. (2020). High school adolescents' physical activity and physical fitness: A 3×2 achievement goal approach. <i>Sustainability</i> , 12(15), 6005.                                                                               |
|                  |  |  |  |  |  |  |  |  | Van Yperen, 2022                        | Van Yperen, N. W. (2022). In the context of a sports match, the goal to win is most important, right? Suggestive evidence for a hierarchical achievement goal system. <i>Psychology of Sport and Exercise</i> , 60, 102134.                                            |
|                  |  |  |  |  |  |  |  |  | Wang et al., 2017                       | Wang, C. J., Liu, W. C., Sun, Y., & Chua, L. L. (2017). Psychometric properties of the 3×2 achievement goal questionnaire for sport. <i>International Journal of Sport and Exercise Psychology</i> , 15(5), 460-474.                                                   |
|                  |  |  |  |  |  |  |  |  | Wei et al., 2020                        | Wei, C. L., Chen, W. J., Lee, M. T. S., & Tien-Liu, T. K. (2020). Psychological trends in the achievement goals of college and university athletes. <i>Journal of Advanced Computational Intelligence and Intelligent Informatics</i> , 24(4), 468-476.                |
|                  |  |  |  |  |  |  |  |  | Chung-Chin, 2014                        | Chung-Chin, W. (2014). Verifying the invariance of a measurement model for achievement goals theory by using the multiple group structural equation modeling. <i>Journal of Research in Education Sciences</i> , 59(3), 59.                                            |
|                  |  |  |  |  |  |  |  |  | Liu & Liu, 2020                         | Liu, S., & Liu, M. (2020). The impact of learner metacognition and goal orientation on problem-solving in a serious game environment. <i>Computers in Human Behavior</i> , 102, 151-165.                                                                               |
| Z.K. hand search |  |  |  |  |  |  |  |  | Ağbuğa 2014                             | Ağbuğa, B. Validity and reliability of 3 x 2 achievement goal model scale in turkish undergraduate students. <i>Hacettepe Journal of Sport Sciences</i> 2014, 25(3), 109-117.                                                                                          |
|                  |  |  |  |  |  |  |  |  | Çetin & Eren 2022                       | Çetin, G.; Eren, A. Pre-service teachers' achievement goal orientations, teacher identity, and sense of personal responsibility: The moderated mediating effects of emotions about teaching. <i>Educational Research for Policy and Practice</i> 2022, 21(2), 245-283. |
|                  |  |  |  |  |  |  |  |  | Kadioglu-Akbulut & Uzuntiryaki-Kondakçı | Kadioglu-Akbulut, C.; Uzuntiryaki-Kondakçı, E. Turkish adaptation of the 3 x 2 goal orientation scale. <i>Bartın University Journal of Faculty of Education</i> 2019, 8(3), 839-866.                                                                                   |

**Supplement File.** Correlates entered for each study.

| Study name           | Subgroup within study | r     | N   | SE   | Correlate Category | Specifics             | Valance   | Goal Definition |
|----------------------|-----------------------|-------|-----|------|--------------------|-----------------------|-----------|-----------------|
| Alasqah 2022         | All goals             | 0.15  | 149 | 0.08 | Performance        | Academic              | Blank     | All Goals       |
| Cecchini et al. 2021 | OAP1M                 | 0.30  | 334 | 0.05 | Motivation         | Intrinsic Motivation  | Approach  | OAP             |
| Cecchini et al. 2021 | OAV1M                 | 0.20  | 334 | 0.05 | Motivation         | Intrinsic Motivation  | Avoidance | OAV             |
| Cecchini et al. 2021 | SAP1M                 | 0.53  | 334 | 0.04 | Motivation         | Intrinsic Motivation  | Approach  | SAP             |
| Cecchini et al. 2021 | SAV1M                 | 0.34  | 334 | 0.05 | Motivation         | Intrinsic Motivation  | Avoidance | SAV             |
| Cecchini et al. 2021 | TAP1M                 | 0.51  | 334 | 0.04 | Motivation         | Intrinsic Motivation  | Approach  | TAP             |
| Cecchini et al. 2021 | TAV1M                 | 0.35  | 334 | 0.05 | Motivation         | Intrinsic Motivation  | Avoidance | TAV             |
| Cecchini et al. 2021 | OAP2M                 | 0.13  | 334 | 0.05 | Motivation (Ext)   | External Regulation   | Approach  | OAP             |
| Cecchini et al. 2021 | OAV2M                 | 0.14  | 334 | 0.05 | Motivation (Ext)   | External Regulation   | Avoidance | OAV             |
| Cecchini et al. 2021 | SAP2M                 | -0.03 | 334 | 0.05 | Motivation (Ext)   | External Regulation   | Approach  | SAP             |
| Cecchini et al. 2021 | SAV2M                 | 0.01  | 334 | 0.05 | Motivation (Ext)   | External Regulation   | Avoidance | SAV             |
| Cecchini et al. 2021 | TAP2M                 | -0.07 | 334 | 0.05 | Motivation (Ext)   | External Regulation   | Approach  | TAP             |
| Cecchini et al. 2021 | TAV2M                 | 0.06  | 334 | 0.05 | Motivation (Ext)   | External Regulation   | Avoidance | TAV             |
| Cecchini et al. 2021 | OAP1                  | 0.09  | 334 | 0.05 | Positive Emotions  | Satisfaction w Life   | Approach  | OAP             |
| Cecchini et al. 2021 | OAP2                  | 0.11  | 334 | 0.05 | Positive Emotions  | Satisfaction w Life   | Approach  | OAP             |
| Cecchini et al. 2021 | OAV1                  | 0.06  | 334 | 0.05 | Positive Emotions  | Satisfaction w Life   | Avoidance | OAV             |
| Cecchini et al. 2021 | OAV2                  | 0.07  | 334 | 0.05 | Positive Emotions  | Satisfaction w Life   | Avoidance | OAV             |
| Cecchini et al. 2021 | SAP1                  | 0.30  | 334 | 0.05 | Positive Emotions  | Satisfaction w Life   | Approach  | SAP             |
| Cecchini et al. 2021 | SAP2                  | 0.27  | 334 | 0.05 | Positive Emotions  | Satisfaction w Life   | Approach  | SAP             |
| Cecchini et al. 2021 | SAV1                  | 0.21  | 334 | 0.05 | Positive Emotions  | Satisfaction w Life   | Avoidance | SAV             |
| Cecchini et al. 2021 | SAV2                  | 0.15  | 334 | 0.05 | Positive Emotions  | Satisfaction w Life   | Avoidance | SAV             |
| Cecchini et al. 2021 | TAP1                  | 0.29  | 334 | 0.05 | Positive Emotions  | Satisfaction w Life   | Approach  | TAP             |
| Cecchini et al. 2021 | TAP2                  | 0.27  | 334 | 0.05 | Positive Emotions  | Satisfaction w Life   | Approach  | TAP             |
| Cecchini et al. 2021 | TAV1                  | 0.24  | 334 | 0.05 | Positive Emotions  | Satisfaction w Life   | Avoidance | TAV             |
| Cecchini et al. 2021 | TAV2                  | 0.15  | 334 | 0.05 | Positive Emotions  | Satisfaction w Life   | Avoidance | TAV             |
| Cowden et al. 2021   | OAP1M                 | 0.42  | 323 | 0.05 | Motivation         | Autonomous Motivation | Approach  | OAP             |

|                     |       |       |     |      |                   |                              |           |     |
|---------------------|-------|-------|-----|------|-------------------|------------------------------|-----------|-----|
| Cowden et al. 2021  | OAP2M | 0.27  | 323 | 0.05 | Motivation        | Controlled Motivation        | Approach  | OAP |
| Cowden et al. 2021  | OAV1M | 0.41  | 323 | 0.05 | Motivation        | Autonomous Motivation        | Avoidance | OAV |
| Cowden et al. 2021  | OAV2M | 0.31  | 323 | 0.05 | Motivation        | Controlled Motivation        | Avoidance | OAV |
| Cowden et al. 2021  | SAP1M | 0.45  | 323 | 0.04 | Motivation        | Autonomous Motivation        | Approach  | SAP |
| Cowden et al. 2021  | SAP2M | 0.19  | 323 | 0.05 | Motivation        | Controlled Motivation        | Approach  | SAP |
| Cowden et al. 2021  | SAV1M | 0.43  | 323 | 0.05 | Motivation        | Autonomous Motivation        | Avoidance | SAV |
| Cowden et al. 2021  | SAV2M | 0.23  | 323 | 0.05 | Motivation        | Controlled Motivation        | Avoidance | SAV |
| Cowden et al. 2021  | TAP1M | 0.47  | 323 | 0.04 | Motivation        | Autonomous Motivation        | Approach  | TAP |
| Cowden et al. 2021  | TAP2M | 0.21  | 323 | 0.05 | Motivation        | Controlled Motivation        | Approach  | TAP |
| Cowden et al. 2021  | TAV1M | 0.40  | 323 | 0.05 | Motivation        | Autonomous Motivation        | Avoidance | TAV |
| Cowden et al. 2021  | TAV2M | 0.26  | 323 | 0.05 | Motivation        | Controlled Motivation        | Avoidance | TAV |
| Danthon et al. 2021 | OAP1  | -0.07 | 486 | 0.05 | Negative Emotions | Text Anxiety Worry           | Approach  | OAP |
| Danthon et al. 2021 | OAP2  | -0.10 | 486 | 0.05 | Negative Emotions | Text Anxiety Self-Focus      | Approach  | OAP |
| Danthon et al. 2021 | OAP3  | 0.01  | 486 | 0.05 | Negative Emotions | Text Anxiety Bodily Symptoms | Approach  | OAP |
| Danthon et al. 2021 | OAP4  | -0.01 | 486 | 0.05 | Negative Emotions | Text Anxiety Somatic Tension | Approach  | OAP |
| Danthon et al. 2021 | OAV1  | 0.11  | 486 | 0.04 | Negative Emotions | Text Anxiety Worry           | Avoidance | OAV |
| Danthon et al. 2021 | OAV2  | 0.08  | 486 | 0.05 | Negative Emotions | Text Anxiety Self-Focus      | Avoidance | OAV |
| Danthon et al. 2021 | OAV3  | 0.09  | 486 | 0.05 | Negative Emotions | Text Anxiety Bodily Symptoms | Avoidance | OAV |
| Danthon et al. 2021 | OAV4  | 0.11  | 486 | 0.04 | Negative Emotions | Text Anxiety Somatic Tension | Avoidance | OAV |
| Danthon et al. 2021 | SAP1  | -0.13 | 486 | 0.04 | Negative Emotions | Text Anxiety Worry           | Approach  | SAP |



|                      |      |       |     |      |                   |                                |           |     |
|----------------------|------|-------|-----|------|-------------------|--------------------------------|-----------|-----|
| Danthony et al. 2021 | SAP2 | -0.21 | 486 | 0.04 | Negative Emotions | Text Anxiety Self-Focus        | Approach  | SAP |
| Danthony et al. 2021 | SAP3 | -0.14 | 486 | 0.04 | Negative Emotions | Text Anxiety Bodily Symptoms   | Approach  | SAP |
| Danthony et al. 2021 | SAP4 | -0.19 | 486 | 0.04 | Negative Emotions | Text Anxiety Somatic Tension   | Approach  | SAP |
| Danthony et al. 2021 | SAV1 | 0.15  | 486 | 0.04 | Negative Emotions | Text Anxiety Worry             | Avoidance | SAV |
| Danthony et al. 2021 | SAV2 | 0.07  | 486 | 0.05 | Negative Emotions | Text Anxiety Self-Focus        | Avoidance | SAV |
| Danthony et al. 2021 | SAV3 | 0.09  | 486 | 0.05 | Negative Emotions | Text Anxiety Bodily Symptoms   | Avoidance | SAV |
| Danthony et al. 2021 | SAV4 | 0.10  | 486 | 0.05 | Negative Emotions | Text Anxiety Somatic Tension   | Avoidance | SAV |
| Danthony et al. 2021 | TAP1 | -0.22 | 486 | 0.04 | Negative Emotions | Text Anxiety Worry             | Approach  | TAP |
| Danthony et al. 2021 | TAP2 | -0.26 | 486 | 0.04 | Negative Emotions | Text Anxiety Self-Focus        | Approach  | TAP |
| Danthony et al. 2021 | TAP3 | -0.09 | 486 | 0.05 | Negative Emotions | Text Anxiety Bodily Symptoms   | Approach  | TAP |
| Danthony et al. 2021 | TAP4 | -0.18 | 486 | 0.04 | Negative Emotions | Text Anxiety Somatic Tension   | Approach  | TAP |
| Danthony et al. 2021 | TAV1 | 0.10  | 486 | 0.05 | Negative Emotions | Text Anxiety Worry             | Avoidance | TAV |
| Danthony et al. 2021 | TAV2 | 0.10  | 486 | 0.05 | Negative Emotions | Text Anxiety Self-Focus        | Avoidance | TAV |
| Danthony et al. 2021 | TAV3 | 0.03  | 486 | 0.05 | Negative Emotions | Text Anxiety Bodily Symptoms   | Avoidance | TAV |
| Danthony et al. 2021 | TAV4 | 0.07  | 486 | 0.05 | Negative Emotions | Text Anxiety Somatic Tension   | Avoidance | TAV |
| Danthony et al. 2021 | OAP5 | 0.30  | 486 | 0.04 | Positive Emotions | Test Anxiety Perceived Control | Approach  | OAP |
| Danthony et al. 2021 | OAV5 | 0.02  | 486 | 0.05 | Positive Emotions | Test Anxiety Perceived Control | Avoidance | OAV |
| Danthony et al. 2021 | SAP5 | 0.25  | 486 | 0.04 | Positive Emotions | Test Anxiety Perceived Control | Approach  | SAP |
| Danthony et al. 2021 | SAV5 | -0.10 | 486 | 0.05 | Positive Emotions | Test Anxiety Perceived Control | Avoidance | SAV |
| Danthony et al. 2021 | TAP5 | 0.37  | 486 | 0.04 | Positive Emotions | Test Anxiety Perceived Control | Approach  | TAP |

|                        |       |       |     |      |                   |                                          |           |     |
|------------------------|-------|-------|-----|------|-------------------|------------------------------------------|-----------|-----|
| Danthonny et al. 2021  | TAV5  | -0.03 | 486 | 0.05 | Positive Emotions | Test Anxiety<br>Perceived Control        | Avoidance | TAV |
| Didin & Kasapoglu 2021 | OAP1L | 0.35  | 440 | 0.04 | Learning          | Learning Strategies<br>in Social Studies | Approach  | OAP |
| Didin & Kasapoglu 2021 | OAV1L | 0.40  | 440 | 0.04 | Learning          | Learning Strategies<br>in Social Studies | Avoidance | OAV |
| Didin & Kasapoglu 2021 | SAP1L | 0.62  | 440 | 0.03 | Learning          | Learning Strategies<br>in Social Studies | Approach  | SAP |
| Didin & Kasapoglu 2021 | SAV1L | 0.48  | 440 | 0.04 | Learning          | Learning Strategies<br>in Social Studies | Avoidance | SAV |
| Didin & Kasapoglu 2021 | TAP1L | 0.52  | 440 | 0.03 | Learning          | Learning Strategies<br>in Social Studies | Approach  | TAP |
| Didin & Kasapoglu 2021 | TAV1L | 0.52  | 440 | 0.03 | Learning          | Learning Strategies<br>in Social Studies | Avoidance | TAV |
| Diseth 2015            | OAP1L | 0.16  | 217 | 0.07 | Learning          | Deep                                     | Approach  | OAP |
| Diseth 2015            | OAP2L | 0.14  | 217 | 0.07 | Learning          | Strategic                                | Approach  | OAP |
| Diseth 2015            | OAP3L | 0.00  | 217 | 0.07 | Learning          | Surface                                  | Approach  | OAP |
| Diseth 2015            | OAV1L | 0.11  | 217 | 0.07 | Learning          | Deep                                     | Avoidance | OAV |
| Diseth 2015            | OAV2L | 0.07  | 217 | 0.07 | Learning          | Strategic                                | Avoidance | OAV |
| Diseth 2015            | OAV3L | 0.12  | 217 | 0.07 | Learning          | Surface                                  | Avoidance | OAV |
| Diseth 2015            | SAP1L | 0.02  | 217 | 0.07 | Learning          | Deep                                     | Approach  | SAP |
| Diseth 2015            | SAP2L | -0.18 | 217 | 0.07 | Learning          | Strategic                                | Approach  | SAP |
| Diseth 2015            | SAP3L | 0.25  | 217 | 0.06 | Learning          | Surface                                  | Approach  | SAP |
| Diseth 2015            | SAV1L | -0.02 | 217 | 0.07 | Learning          | Deep                                     | Avoidance | SAV |
| Diseth 2015            | SAV2L | -0.13 | 217 | 0.07 | Learning          | Strategic                                | Avoidance | SAV |
| Diseth 2015            | SAV3L | 0.24  | 217 | 0.06 | Learning          | Surface                                  | Avoidance | SAV |
| Diseth 2015            | TAP1L | 0.15  | 217 | 0.07 | Learning          | Deep                                     | Approach  | TAP |
| Diseth 2015            | TAP2L | 0.28  | 217 | 0.06 | Learning          | Strategic                                | Approach  | TAP |
| Diseth 2015            | TAP3L | 0.09  | 217 | 0.07 | Learning          | Surface                                  | Approach  | TAP |
| Diseth 2015            | TAV1L | -0.01 | 217 | 0.07 | Learning          | Deep                                     | Avoidance | TAV |
| Diseth 2015            | TAV2L | -0.05 | 217 | 0.07 | Learning          | Strategic                                | Avoidance | TAV |
| Diseth 2015            | TAV3L | 0.18  | 217 | 0.07 | Learning          | Surface                                  | Avoidance | TAV |
| Diseth 2015            | OAP1M | 0.14  | 217 | 0.07 | Motivation        | Motive for Success                       | Approach  | OAP |

|             |       |       |     |      |                |                         |           |     |
|-------------|-------|-------|-----|------|----------------|-------------------------|-----------|-----|
| Diseth 2015 | OAP3M | 0.29  | 217 | 0.06 | Motivation     | Self-efficacy           | Approach  | OAP |
| Diseth 2015 | OAP4M | 0.08  | 217 | 0.07 | Motivation     | Task Value              | Approach  | OAP |
| Diseth 2015 | OAV1M | 0.02  | 217 | 0.07 | Motivation     | Motive for Success      | Avoidance | OAV |
| Diseth 2015 | OAV3M | 0.11  | 217 | 0.07 | Motivation     | Self-efficacy           | Avoidance | OAV |
| Diseth 2015 | OAV4M | 0.09  | 217 | 0.07 | Motivation     | Task Value              | Avoidance | OAV |
| Diseth 2015 | SAP1M | -0.05 | 217 | 0.07 | Motivation     | Motive for Success      | Approach  | SAP |
| Diseth 2015 | SAP3M | 0.01  | 217 | 0.07 | Motivation     | Self-efficacy           | Approach  | SAP |
| Diseth 2015 | SAP4M | 0.14  | 217 | 0.07 | Motivation     | Task Value              | Approach  | SAP |
| Diseth 2015 | SAV1M | -0.04 | 217 | 0.07 | Motivation     | Motive for Success      | Avoidance | SAV |
| Diseth 2015 | SAV3M | -0.13 | 217 | 0.07 | Motivation     | Self-efficacy           | Avoidance | SAV |
| Diseth 2015 | SAV4M | 0.05  | 217 | 0.07 | Motivation     | Task Value              | Avoidance | SAV |
| Diseth 2015 | TAP1M | 0.18  | 217 | 0.07 | Motivation     | Motive for Success      | Approach  | TAP |
| Diseth 2015 | TAP3M | 0.21  | 217 | 0.07 | Motivation     | Self-efficacy           | Approach  | TAP |
| Diseth 2015 | TAP4M | 0.25  | 217 | 0.06 | Motivation     | Task Value              | Approach  | TAP |
| Diseth 2015 | TAV1M | -0.01 | 217 | 0.07 | Motivation     | Motive for Success      | Avoidance | TAV |
| Diseth 2015 | TAV3M | -0.10 | 217 | 0.07 | Motivation     | Self-efficacy           | Avoidance | TAV |
| Diseth 2015 | TAV4M | 0.08  | 217 | 0.07 | Motivation     | Task Value              | Avoidance | TAV |
| Diseth 2015 | OAP2M | 0.06  | 217 | 0.07 | Motivation (D) | Motive to Avoid Failure | Approach  | OAP |
| Diseth 2015 | OAV2M | 0.12  | 217 | 0.07 | Motivation (D) | Motive to Avoid Failure | Avoidance | OAV |
| Diseth 2015 | SAP2M | 0.11  | 217 | 0.07 | Motivation (D) | Motive to Avoid Failure | Approach  | SAP |
| Diseth 2015 | SAV2M | 0.15  | 217 | 0.07 | Motivation (D) | Motive to Avoid Failure | Avoidance | SAV |
| Diseth 2015 | TAP2M | -0.12 | 217 | 0.07 | Motivation (D) | Motive to Avoid Failure | Approach  | TAP |
| Diseth 2015 | TAV2M | 0.14  | 217 | 0.07 | Motivation (D) | Motive to Avoid Failure | Avoidance | TAV |
| Diseth 2015 | OAP1P | 0.26  | 217 | 0.06 | Performance    | Academic Achievement    | Approach  | OAP |
| Diseth 2015 | OAV1P | 0.02  | 217 | 0.07 | Performance    | Academic Achievement    | Avoidance | OAV |

|                           |       |       |      |      |             |                            |           |     |
|---------------------------|-------|-------|------|------|-------------|----------------------------|-----------|-----|
| Diseth 2015               | SAP1P | -0.23 | 217  | 0.06 | Performance | Academic Achievement       | Approach  | SAP |
| Diseth 2015               | SAV1P | -0.02 | 217  | 0.07 | Performance | Academic Achievement       | Avoidance | SAV |
| Diseth 2015               | TAP1P | 0.12  | 217  | 0.07 | Performance | Academic Achievement       | Approach  | TAP |
| Diseth 2015               | TAV1P | 0.05  | 217  | 0.07 | Performance | Academic Achievement       | Avoidance | TAV |
| Garcia-Romero 2015        | OAP1M | 0.33  | 205  | 0.06 | Motivation  | Competence Needs           | Approach  | OAP |
| Garcia-Romero 2015        | OAV1M | 0.28  | 205  | 0.06 | Motivation  | Competence Needs           | Avoidance | OAV |
| Garcia-Romero 2015        | SAP1M | 0.54  | 205  | 0.05 | Motivation  | Competence Needs           | Approach  | SAP |
| Garcia-Romero 2015        | SAV1M | 0.36  | 205  | 0.06 | Motivation  | Competence Needs           | Avoidance | SAV |
| Garcia-Romero 2015        | TAP1M | 0.61  | 205  | 0.04 | Motivation  | Competence Needs           | Approach  | TAP |
| Garcia-Romero 2015        | TAV1M | 0.36  | 205  | 0.06 | Motivation  | Competence Needs           | Avoidance | TAV |
| García-Romero et al. 2020 | OAP1M | 0.32  | 1706 | 0.02 | Motivation  | Autonomy Need Satisfaction | Approach  | OAP |
| García-Romero et al. 2020 | OAV1M | 0.31  | 1706 | 0.02 | Motivation  | Autonomy Need Satisfaction | Avoidance | OAV |
| García-Romero et al. 2020 | SAP1M | 0.43  | 1706 | 0.02 | Motivation  | Autonomy Need Satisfaction | Approach  | SAP |
| García-Romero et al. 2020 | SAV1M | 0.33  | 1706 | 0.02 | Motivation  | Autonomy Need Satisfaction | Avoidance | SAV |
| García-Romero et al. 2020 | TAP1M | 0.44  | 1706 | 0.02 | Motivation  | Autonomy Need Satisfaction | Approach  | TAP |
| García-Romero et al. 2020 | TAV1M | 0.30  | 1706 | 0.02 | Motivation  | Autonomy Need Satisfaction | Avoidance | TAV |
| García-Romero et al. 2022 | OAP1M | 0.32  | 1706 | 0.02 | Motivation  | Autonomy                   | Approach  | OAP |
| García-Romero et al. 2022 | OAP2M | 0.39  | 1706 | 0.02 | Motivation  | Competence                 | Approach  | OAP |
| García-Romero et al. 2022 | OAP3M | 0.22  | 1706 | 0.02 | Motivation  | Relatedness                | Approach  | OAP |
| García-Romero et al. 2022 | OAP4M | -0.02 | 1706 | 0.02 | Motivation  | SDI                        | Approach  | OAP |
| García-Romero et al. 2022 | OAV1M | 0.31  | 1706 | 0.02 | Motivation  | Autonomy                   | Avoidance | OAV |
| García-Romero et al. 2022 | OAV2M | 0.38  | 1706 | 0.02 | Motivation  | Competence                 | Avoidance | OAV |
| García-Romero et al. 2022 | OAV3M | 0.24  | 1706 | 0.02 | Motivation  | Relatedness                | Avoidance | OAV |
| García-Romero et al. 2022 | OAV4M | 0.07  | 1706 | 0.02 | Motivation  | SDI                        | Avoidance | OAV |

|                           |       |       |      |      |                   |                     |           |     |
|---------------------------|-------|-------|------|------|-------------------|---------------------|-----------|-----|
| García-Romero et al. 2022 | SAP1M | 0.43  | 1706 | 0.02 | Motivation        | Autonomy            | Approach  | SAP |
| García-Romero et al. 2022 | SAP2M | 0.55  | 1706 | 0.02 | Motivation        | Competence          | Approach  | SAP |
| García-Romero et al. 2022 | SAP3M | 0.43  | 1706 | 0.02 | Motivation        | Relatedness         | Approach  | SAP |
| García-Romero et al. 2022 | SAP4M | 0.36  | 1706 | 0.02 | Motivation        | SDI                 | Approach  | SAP |
| García-Romero et al. 2022 | SAV1M | 0.33  | 1706 | 0.02 | Motivation        | Autonomy            | Avoidance | SAV |
| García-Romero et al. 2022 | SAV2M | 0.42  | 1706 | 0.02 | Motivation        | Competence          | Avoidance | SAV |
| García-Romero et al. 2022 | SAV3M | 0.29  | 1706 | 0.02 | Motivation        | Relatedness         | Avoidance | SAV |
| García-Romero et al. 2022 | SAV4M | 0.26  | 1706 | 0.02 | Motivation        | SDI                 | Avoidance | SAV |
| García-Romero et al. 2022 | TAP1M | 0.44  | 1706 | 0.02 | Motivation        | Autonomy            | Approach  | TAP |
| García-Romero et al. 2022 | TAP2M | 0.61  | 1706 | 0.02 | Motivation        | Competence          | Approach  | TAP |
| García-Romero et al. 2022 | TAP3M | 0.46  | 1706 | 0.02 | Motivation        | Relatedness         | Approach  | TAP |
| García-Romero et al. 2022 | TAP4M | 0.39  | 1706 | 0.02 | Motivation        | SDI                 | Approach  | TAP |
| García-Romero et al. 2022 | TAV1M | 0.30  | 1706 | 0.02 | Motivation        | Autonomy            | Avoidance | TAV |
| García-Romero et al. 2022 | TAV2M | 0.40  | 1706 | 0.02 | Motivation        | Competence          | Avoidance | TAV |
| García-Romero et al. 2022 | TAV3M | 0.32  | 1706 | 0.02 | Motivation        | Relatedness         | Avoidance | TAV |
| García-Romero et al. 2022 | TAV4M | 0.32  | 1706 | 0.02 | Motivation        | SDI                 | Avoidance | TAV |
| García-Romero et al. 2022 | OAP1  | 0.20  | 1706 | 0.02 | Positive Emotions | Satisfaction w Life | Approach  | OAP |
| García-Romero et al. 2022 | OAV1  | 0.20  | 1706 | 0.02 | Positive Emotions | Satisfaction w Life | Avoidance | OAV |
| García-Romero et al. 2022 | SAP1  | 0.31  | 1706 | 0.02 | Positive Emotions | Satisfaction w Life | Approach  | SAP |
| García-Romero et al. 2022 | SAV1  | 0.25  | 1706 | 0.02 | Positive Emotions | Satisfaction w Life | Avoidance | SAV |
| García-Romero et al. 2022 | TAP1  | 0.37  | 1706 | 0.02 | Positive Emotions | Satisfaction w Life | Approach  | TAP |
| García-Romero et al. 2022 | TAV1  | 0.29  | 1706 | 0.02 | Positive Emotions | Satisfaction w Life | Avoidance | TAV |
| Gillet et al. 2015 S1     | OAP1L | 0.07  | 278  | 0.06 | Learning          | Study Engagement    | Approach  | OAP |
| Gillet et al. 2015 S1     | OAV1L | 0.01  | 278  | 0.06 | Learning          | Study Engagement    | Avoidance | OAV |
| Gillet et al. 2015 S1     | SAP1L | 0.13  | 278  | 0.06 | Learning          | Study Engagement    | Approach  | SAP |
| Gillet et al. 2015 S1     | SAV1L | 0.03  | 278  | 0.06 | Learning          | Study Engagement    | Avoidance | SAV |
| Gillet et al. 2015 S1     | TAP1L | 0.13  | 278  | 0.06 | Learning          | Study Engagement    | Approach  | TAP |
| Gillet et al. 2015 S1     | TAV1L | 0.02  | 278  | 0.06 | Learning          | Study Engagement    | Avoidance | TAV |
| Gillet et al. 2015 S1     | OAP1  | 0.07  | 278  | 0.06 | Positive Emotions | Satisfaction        | Approach  | OAP |
| Gillet et al. 2015 S1     | OAP2  | 0.12  | 278  | 0.06 | Positive Emotions | Positive Affect     | Approach  | OAP |
| Gillet et al. 2015 S1     | OAV1  | -0.08 | 278  | 0.06 | Positive Emotions | Satisfaction        | Avoidance | OAV |

|                       |       |       |     |      |                   |                  |           |     |
|-----------------------|-------|-------|-----|------|-------------------|------------------|-----------|-----|
| Gillet et al. 2015 S1 | OAV2  | 0.01  | 278 | 0.06 | Positive Emotions | Positive Affect  | Avoidance | OAV |
| Gillet et al. 2015 S1 | SAP1  | 0.13  | 278 | 0.06 | Positive Emotions | Satisfaction     | Approach  | SAP |
| Gillet et al. 2015 S1 | SAP2  | 0.11  | 278 | 0.06 | Positive Emotions | Positive Affect  | Approach  | SAP |
| Gillet et al. 2015 S1 | SAV1  | 0.01  | 278 | 0.06 | Positive Emotions | Satisfaction     | Avoidance | SAV |
| Gillet et al. 2015 S1 | SAV2  | 0.00  | 278 | 0.06 | Positive Emotions | Positive Affect  | Avoidance | SAV |
| Gillet et al. 2015 S1 | TAP1  | 0.14  | 278 | 0.06 | Positive Emotions | Satisfaction     | Approach  | TAP |
| Gillet et al. 2015 S1 | TAP2  | 0.14  | 278 | 0.06 | Positive Emotions | Positive Affect  | Approach  | TAP |
| Gillet et al. 2015 S1 | TAV1  | 0.04  | 278 | 0.06 | Positive Emotions | Satisfaction     | Avoidance | TAV |
| Gillet et al. 2015 S1 | TAV2  | 0.01  | 278 | 0.06 | Positive Emotions | Positive Affect  | Avoidance | TAV |
| Gillet et al. 2015 S2 | OAP1L | 0.11  | 327 | 0.05 | Learning          | Study Engagement | Approach  | OAP |
| Gillet et al. 2015 S2 | OAV1L | 0.11  | 327 | 0.05 | Learning          | Study Engagement | Avoidance | OAV |
| Gillet et al. 2015 S2 | SAP1L | 0.11  | 327 | 0.05 | Learning          | Study Engagement | Approach  | SAP |
| Gillet et al. 2015 S2 | SAV1L | 0.00  | 327 | 0.06 | Learning          | Study Engagement | Avoidance | SAV |
| Gillet et al. 2015 S2 | TAP1L | 0.17  | 327 | 0.05 | Learning          | Study Engagement | Approach  | TAP |
| Gillet et al. 2015 S2 | TAV1L | 0.14  | 327 | 0.05 | Learning          | Study Engagement | Avoidance | TAV |
| Gillet et al. 2015 S2 | OAP3  | 0.05  | 327 | 0.06 | Negative Emotions | Anxiety          | Approach  | OAP |
| Gillet et al. 2015 S2 | OAV3  | 0.14  | 327 | 0.05 | Negative Emotions | Anxiety          | Avoidance | OAV |
| Gillet et al. 2015 S2 | SAP3  | 0.09  | 327 | 0.06 | Negative Emotions | Anxiety          | Approach  | SAP |
| Gillet et al. 2015 S2 | SAV3  | 0.05  | 327 | 0.06 | Negative Emotions | Anxiety          | Avoidance | SAV |
| Gillet et al. 2015 S2 | TAP3  | 0.07  | 327 | 0.06 | Negative Emotions | Anxiety          | Approach  | TAP |
| Gillet et al. 2015 S2 | TAV3  | 0.12  | 327 | 0.05 | Negative Emotions | Anxiety          | Avoidance | TAV |
| Gillet et al. 2015 S2 | OAP1  | 0.07  | 327 | 0.06 | Positive Emotions | Satisfaction     | Approach  | OAP |
| Gillet et al. 2015 S2 | OAP2  | 0.15  | 327 | 0.05 | Positive Emotions | Positive Affect  | Approach  | OAP |
| Gillet et al. 2015 S2 | OAV1  | 0.11  | 327 | 0.05 | Positive Emotions | Satisfaction     | Avoidance | OAV |
| Gillet et al. 2015 S2 | OAV2  | 0.15  | 327 | 0.05 | Positive Emotions | Positive Affect  | Avoidance | OAV |
| Gillet et al. 2015 S2 | SAP1  | 0.09  | 327 | 0.06 | Positive Emotions | Satisfaction     | Approach  | SAP |
| Gillet et al. 2015 S2 | SAP2  | 0.10  | 327 | 0.06 | Positive Emotions | Positive Affect  | Approach  | SAP |
| Gillet et al. 2015 S2 | SAV1  | -0.01 | 327 | 0.06 | Positive Emotions | Satisfaction     | Avoidance | SAV |
| Gillet et al. 2015 S2 | SAV2  | 0.04  | 327 | 0.06 | Positive Emotions | Positive Affect  | Avoidance | SAV |
| Gillet et al. 2015 S2 | TAP1  | 0.19  | 327 | 0.05 | Positive Emotions | Satisfaction     | Approach  | TAP |
| Gillet et al. 2015 S2 | TAP2  | 0.21  | 327 | 0.05 | Positive Emotions | Positive Affect  | Approach  | TAP |

|                       |             |       |     |      |                   |                                  |           |           |
|-----------------------|-------------|-------|-----|------|-------------------|----------------------------------|-----------|-----------|
| Gillet et al. 2015 S2 | TAV1        | 0.18  | 327 | 0.05 | Positive Emotions | Satisfaction                     | Avoidance | TAV       |
| Gillet et al. 2015 S2 | TAV2        | 0.14  | 327 | 0.05 | Positive Emotions | Positive Affect                  | Avoidance | TAV       |
| Gillet et al. 2015 S3 | OAP1L       | 0.21  | 169 | 0.07 | Learning          | Study Engagement                 | Approach  | OAP       |
| Gillet et al. 2015 S3 | OAV1L       | -0.02 | 169 | 0.08 | Learning          | Study Engagement                 | Avoidance | OAV       |
| Gillet et al. 2015 S3 | SAP1L       | 0.29  | 169 | 0.07 | Learning          | Study Engagement                 | Approach  | SAP       |
| Gillet et al. 2015 S3 | SAV1L       | -0.06 | 169 | 0.08 | Learning          | Study Engagement                 | Avoidance | SAV       |
| Gillet et al. 2015 S3 | TAP1L       | 0.23  | 169 | 0.07 | Learning          | Study Engagement                 | Approach  | TAP       |
| Gillet et al. 2015 S3 | TAV1L       | -0.02 | 169 | 0.08 | Learning          | Study Engagement                 | Avoidance | TAV       |
| Gillet et al. 2015 S3 | OAP1        | 0.09  | 169 | 0.08 | Positive Emotions | Satisfaction                     | Approach  | OAP       |
| Gillet et al. 2015 S3 | OAP2        | 0.19  | 169 | 0.07 | Positive Emotions | Positive Affect                  | Approach  | OAP       |
| Gillet et al. 2015 S3 | OAV1        | -0.02 | 169 | 0.08 | Positive Emotions | Satisfaction                     | Avoidance | OAV       |
| Gillet et al. 2015 S3 | OAV2        | 0.07  | 169 | 0.08 | Positive Emotions | Positive Affect                  | Avoidance | OAV       |
| Gillet et al. 2015 S3 | SAP1        | 0.11  | 169 | 0.08 | Positive Emotions | Satisfaction                     | Approach  | SAP       |
| Gillet et al. 2015 S3 | SAP2        | 0.28  | 169 | 0.07 | Positive Emotions | Positive Affect                  | Approach  | SAP       |
| Gillet et al. 2015 S3 | SAV1        | -0.08 | 169 | 0.08 | Positive Emotions | Satisfaction                     | Avoidance | SAV       |
| Gillet et al. 2015 S3 | SAV2        | -0.05 | 169 | 0.08 | Positive Emotions | Positive Affect                  | Avoidance | SAV       |
| Gillet et al. 2015 S3 | TAP1        | 0.15  | 169 | 0.08 | Positive Emotions | Satisfaction                     | Approach  | TAP       |
| Gillet et al. 2015 S3 | TAP2        | 0.31  | 169 | 0.07 | Positive Emotions | Positive Affect                  | Approach  | TAP       |
| Gillet et al. 2015 S3 | TAV1        | -0.02 | 169 | 0.08 | Positive Emotions | Satisfaction                     | Avoidance | TAV       |
| Gillet et al. 2015 S3 | TAV2        | -0.01 | 169 | 0.08 | Positive Emotions | Positive Affect                  | Avoidance | TAV       |
| Hidayat et al. 2018 B | All goals2L | 0.43  | 538 | 0.04 | Learning          | Metacognition Awareness          | Blank     | All Goals |
| Hidayat et al. 2018 B | All goals3L | 0.54  | 538 | 0.03 | Learning          | Metacognition Cognitive Strategy | Blank     | All Goals |
| Hidayat et al. 2018 B | All goals4L | 0.48  | 538 | 0.03 | Learning          | Metacognition Planning           | Blank     | All Goals |
| Hidayat et al. 2018 B | All goals5L | 0.48  | 538 | 0.03 | Learning          | Metacognition Self-checking      | Blank     | All Goals |
| Hidayat et al. 2018 B | All goals1L | 0.46  | 538 | 0.03 | Performance       | Math Modeling Competency         | Blank     | All Goals |
| Hidayat et al. 2018 C | SAP1L       | 0.34  | 483 | 0.04 | Learning          | Metacognition                    | Approach  | SAP       |
| Hidayat et al. 2018 C | SAV1L       | 0.30  | 483 | 0.04 | Learning          | Metacognition                    | Avoidance | SAV       |

|                            |                 |       |     |      |             |                                            |           |     |
|----------------------------|-----------------|-------|-----|------|-------------|--------------------------------------------|-----------|-----|
| Hidayat et al. 2018 C      | TAP1L           | 0.26  | 483 | 0.04 | Learning    | Metacognition                              | Approach  | TAP |
| Hidayat et al. 2018 C      | TAV1L           | 0.30  | 483 | 0.04 | Learning    | Metacognition                              | Avoidance | TAV |
| Ireri et al. 2021          | Approach goals  | 0.20  | 385 | 0.05 | Performance | Academic Achievement                       | Approach  | OAP |
| Ireri et al. 2021          | Avoidance goals | -0.15 | 385 | 0.05 | Performance | Academic Achievement                       | Approach  | OAP |
| Kiliçoğlu 2019             | OAP1L           | 0.13  | 346 | 0.05 | Learning    | Use of Cognitive Strategies                | Approach  | OAP |
| Kiliçoğlu 2019             | OAP2L           | 0.22  | 346 | 0.05 | Learning    | Self-regulation                            | Approach  | OAP |
| Kiliçoğlu 2019             | OAV1L           | 0.33  | 346 | 0.05 | Learning    | Use of Cognitive Strategies                | Avoidance | OAV |
| Kiliçoğlu 2019             | OAV2L           | 0.26  | 346 | 0.05 | Learning    | Self-regulation                            | Avoidance | OAV |
| Kiliçoğlu 2019             | SAP1L           | 0.61  | 346 | 0.03 | Learning    | Use of Cognitive Strategies                | Approach  | SAP |
| Kiliçoğlu 2019             | SAP2L           | 0.41  | 346 | 0.04 | Learning    | Self-regulation                            | Approach  | SAP |
| Kiliçoğlu 2019             | SAV1L           | 0.34  | 346 | 0.05 | Learning    | Use of Cognitive Strategies                | Avoidance | SAV |
| Kiliçoğlu 2019             | SAV2L           | 0.29  | 346 | 0.05 | Learning    | Self-regulation                            | Avoidance | SAV |
| Kiliçoğlu 2019             | TAP1L           | 0.58  | 346 | 0.04 | Learning    | Use of Cognitive Strategies                | Approach  | TAP |
| Kiliçoğlu 2019             | TAP2L           | 0.34  | 346 | 0.05 | Learning    | Self-regulation                            | Approach  | TAP |
| Kiliçoğlu 2019             | TAV1L           | 0.53  | 346 | 0.04 | Learning    | Use of Cognitive Strategies                | Avoidance | TAV |
| Kiliçoğlu 2019             | TAV2L           | 0.40  | 346 | 0.05 | Learning    | Self-regulation                            | Avoidance | TAV |
| León-del-Barco et al. 2019 | OAP1L           | 0.14  | 700 | 0.04 | Learning    | Academic Consequences of Teamwork          | Approach  | OAP |
| León-del-Barco et al. 2019 | OAP2L           | -0.01 | 700 | 0.04 | Learning    | Assessment of Interactions during Teamwork | Approach  | OAP |
| León-del-Barco et al. 2019 | OAV1L           | 0.12  | 700 | 0.04 | Learning    | Academic Consequences of Teamwork          | Avoidance | OAV |
| León-del-Barco et al. 2019 | OAV2L           | 0.07  | 700 | 0.04 | Learning    | Assessment of Interactions during Teamwork | Avoidance | OAV |



|                            |       |       |     |      |                   |                                            |           |     |
|----------------------------|-------|-------|-----|------|-------------------|--------------------------------------------|-----------|-----|
| León-del-Barco et al. 2019 | SAP1L | 0.22  | 700 | 0.04 | Learning          | Academic Consequences of Teamwork          | Approach  | SAP |
| León-del-Barco et al. 2019 | SAP2L | 0.22  | 700 | 0.04 | Learning          | Assessment of Interactions during Teamwork | Approach  | SAP |
| León-del-Barco et al. 2019 | SAV1L | 0.13  | 700 | 0.04 | Learning          | Academic Consequences of Teamwork          | Avoidance | SAV |
| León-del-Barco et al. 2019 | SAV2L | 0.06  | 700 | 0.04 | Learning          | Assessment of Interactions during Teamwork | Avoidance | SAV |
| León-del-Barco et al. 2019 | TAP1L | 0.13  | 700 | 0.04 | Learning          | Academic Consequences of Teamwork          | Approach  | TAP |
| León-del-Barco et al. 2019 | TAP2L | 0.28  | 700 | 0.03 | Learning          | Assessment of Interactions during Teamwork | Approach  | TAP |
| León-del-Barco et al. 2019 | TAV1L | 0.04  | 700 | 0.04 | Learning          | Academic Consequences of Teamwork          | Avoidance | TAV |
| León-del-Barco et al. 2019 | TAV2L | 0.13  | 700 | 0.04 | Learning          | Assessment of Interactions during Teamwork | Avoidance | TAV |
| Liu & Liu 2020             | OAP1M | 0.21  | 159 | 0.08 | Learning          | Metacognition                              | Approach  | OAP |
| Liu & Liu 2020             | OAV1M | 0.21  | 159 | 0.08 | Learning          | Metacognition                              | Avoidance | OAV |
| Liu & Liu 2020             | SAP1M | 0.27  | 159 | 0.07 | Learning          | Metacognition                              | Approach  | SAP |
| Liu & Liu 2020             | SAV1M | 0.23  | 159 | 0.08 | Learning          | Metacognition                              | Avoidance | SAV |
| Liu & Liu 2020             | TAP1M | 0.27  | 159 | 0.07 | Learning          | Metacognition                              | Approach  | TAP |
| Liu & Liu 2020             | TAV1M | 0.19  | 159 | 0.08 | Learning          | Metacognition                              | Avoidance | TAV |
| Lüftenegger et al. 2016    | OAP2  | 0.01  | 388 | 0.05 | Negative Emotions | Boredom                                    | Approach  | OAP |
| Lüftenegger et al. 2016    | OAV2  | 0.06  | 388 | 0.05 | Negative Emotions | Boredom                                    | Avoidance | OAV |
| Lüftenegger et al. 2016    | SAP2  | -0.08 | 388 | 0.05 | Negative Emotions | Boredom                                    | Approach  | SAP |
| Lüftenegger et al. 2016    | SAV2  | -0.03 | 388 | 0.05 | Negative Emotions | Boredom                                    | Avoidance | SAV |
| Lüftenegger et al. 2016    | TAP2  | -0.17 | 388 | 0.05 | Negative Emotions | Boredom                                    | Approach  | TAP |

|                         |        |       |     |      |                       |                    |           |     |
|-------------------------|--------|-------|-----|------|-----------------------|--------------------|-----------|-----|
| Lüftenegger et al. 2016 | TAV2   | -0.03 | 388 | 0.05 | Negative Emotions     | Boredom            | Avoidance | TAV |
| Lüftenegger et al. 2016 | OAP1P  | 0.16  | 388 | 0.05 | Performance           | Academic           | Approach  | OAP |
| Lüftenegger et al. 2016 | OAV1P  | 0.07  | 388 | 0.05 | Performance           | Academic           | Avoidance | OAV |
| Lüftenegger et al. 2016 | SAP1P  | 0.06  | 388 | 0.05 | Performance           | Academic           | Approach  | SAP |
| Lüftenegger et al. 2016 | SAV1P  | 0.12  | 388 | 0.05 | Performance           | Academic           | Avoidance | SAV |
| Lüftenegger et al. 2016 | TAP1P  | 0.17  | 388 | 0.05 | Performance           | Academic           | Approach  | TAP |
| Lüftenegger et al. 2016 | TAV1P  | 0.05  | 388 | 0.05 | Performance           | Academic           | Avoidance | TAV |
| Lüftenegger et al. 2016 | OAP1   | 0.25  | 388 | 0.05 | Positive Emotions     | Enjoyment          | Approach  | OAP |
| Lüftenegger et al. 2016 | OAV1   | 0.17  | 388 | 0.05 | Positive Emotions     | Enjoyment          | Avoidance | OAV |
| Lüftenegger et al. 2016 | SAP1   | 0.32  | 388 | 0.05 | Positive Emotions     | Enjoyment          | Approach  | SAP |
| Lüftenegger et al. 2016 | SAV1   | 0.16  | 388 | 0.05 | Positive Emotions     | Enjoyment          | Avoidance | SAV |
| Lüftenegger et al. 2016 | TAP1   | 0.17  | 388 | 0.05 | Positive Emotions     | Enjoyment          | Approach  | TAP |
| Lüftenegger et al. 2016 | TAV1   | 0.04  | 388 | 0.05 | Positive Emotions     | Enjoyment          | Avoidance | TAV |
| Mascret et al. 2015 A   | OAP12D | 0.08  | 302 | 0.06 | Individual Difference | Incremental Theory | Approach  | OAP |
| Mascret et al. 2015 A   | OAP1ID | 0.19  | 302 | 0.06 | Individual Difference | Entity Theory      | Approach  | OAP |
| Mascret et al. 2015 A   | OAV12D | 0.07  | 302 | 0.06 | Individual Difference | Incremental Theory | Avoidance | OAV |
| Mascret et al. 2015 A   | OAV1ID | 0.13  | 302 | 0.06 | Individual Difference | Entity Theory      | Avoidance | OAV |
| Mascret et al. 2015 A   | SAP12D | 0.24  | 302 | 0.05 | Individual Difference | Incremental Theory | Approach  | SAP |
| Mascret et al. 2015 A   | SAP1ID | -0.03 | 302 | 0.06 | Individual Difference | Entity Theory      | Approach  | SAP |
| Mascret et al. 2015 A   | SAV12D | 0.09  | 302 | 0.06 | Individual Difference | Incremental Theory | Avoidance | SAV |
| Mascret et al. 2015 A   | SAV1ID | -0.01 | 302 | 0.06 | Individual Difference | Entity Theory      | Avoidance | SAV |
| Mascret et al. 2015 A   | TAP12D | 0.23  | 302 | 0.05 | Individual Difference | Incremental Theory | Approach  | TAP |
| Mascret et al. 2015 A   | TAP1ID | -0.01 | 302 | 0.06 | Individual Difference | Entity Theory      | Approach  | TAP |

|                          |        |       |     |      |                       |                            |           |     |
|--------------------------|--------|-------|-----|------|-----------------------|----------------------------|-----------|-----|
| Mascret et al. 2015 A    | TAV12D | 0.09  | 302 | 0.06 | Individual Difference | Incremental Theory         | Avoidance | TAV |
| Mascret et al. 2015 A    | TAV11D | -0.05 | 302 | 0.06 | Individual Difference | Entity Theory              | Avoidance | TAV |
| Mascret et al. 2015 A S2 | OAP1M  | 0.00  | 302 | 0.06 | Motivation            | Intrinsic Interest         | Approach  | OAP |
| Mascret et al. 2015 A S2 | OAV1M  | -0.03 | 302 | 0.06 | Motivation            | Intrinsic Interest         | Avoidance | OAV |
| Mascret et al. 2015 A S2 | SAP1M  | 0.24  | 302 | 0.05 | Motivation            | Intrinsic Interest         | Approach  | SAP |
| Mascret et al. 2015 A S2 | SAV1M  | 0.09  | 302 | 0.06 | Motivation            | Intrinsic Interest         | Avoidance | SAV |
| Mascret et al. 2015 A S2 | TAP1M  | 0.27  | 302 | 0.05 | Motivation            | Intrinsic Interest         | Approach  | TAP |
| Mascret et al. 2015 A S2 | TAV1M  | 0.01  | 302 | 0.06 | Motivation            | Intrinsic Interest         | Avoidance | TAV |
| Mascret et al. 2015 B    | OAP12D | 0.00  | 304 | 0.06 | Individual Difference | Incremental Theory         | Approach  | OAP |
| Mascret et al. 2015 B    | OAP11D | 0.26  | 304 | 0.05 | Individual Difference | Entity Theory              | Approach  | OAP |
| Mascret et al. 2015 B    | OAV12D | -0.10 | 304 | 0.06 | Individual Difference | Incremental Theory         | Avoidance | OAV |
| Mascret et al. 2015 B    | OAV11D | 0.41  | 304 | 0.05 | Individual Difference | Entity Theory              | Avoidance | OAV |
| Mascret et al. 2015 B    | SAP12D | 0.19  | 304 | 0.06 | Individual Difference | Incremental Theory         | Approach  | SAP |
| Mascret et al. 2015 B    | SAP11D | 0.03  | 304 | 0.06 | Individual Difference | Entity Theory              | Approach  | SAP |
| Mascret et al. 2015 B    | SAV12D | 0.12  | 304 | 0.06 | Individual Difference | Incremental Theory         | Avoidance | SAV |
| Mascret et al. 2015 B    | SAV11D | 0.11  | 304 | 0.06 | Individual Difference | Entity Theory              | Avoidance | SAV |
| Mascret et al. 2015 B    | TAP12D | 0.00  | 304 | 0.06 | Individual Difference | Incremental Theory         | Approach  | TAP |
| Mascret et al. 2015 B    | TAP1D  | -0.09 | 304 | 0.06 | Individual Difference | Entity Theory              | Approach  | TAP |
| Mascret et al. 2015 B    | TAV12D | 0.06  | 304 | 0.06 | Individual Difference | Incremental Theory         | Avoidance | TAV |
| Mascret et al. 2015 B    | TAV11D | -0.12 | 304 | 0.06 | Individual Difference | Entity Theory              | Avoidance | TAV |
| Mascret et al. 2015 B    | OAP1L  | -0.06 | 304 | 0.06 | Learning              | Mastery Teaching Practices | Approach  | OAP |

|                       |       |       |     |      |                   |                                |           |     |
|-----------------------|-------|-------|-----|------|-------------------|--------------------------------|-----------|-----|
| Mascret et al. 2015 B | OAP2L | 0.12  | 304 | 0.06 | Learning          | Performance Teaching Practices | Approach  | OAP |
| Mascret et al. 2015 B | OAV1L | 0.05  | 304 | 0.06 | Learning          | Mastery Teaching Practices     | Avoidance | OAV |
| Mascret et al. 2015 B | OAV2L | 0.13  | 304 | 0.06 | Learning          | Performance Teaching Practices | Avoidance | OAV |
| Mascret et al. 2015 B | SAP1L | 0.02  | 304 | 0.06 | Learning          | Mastery Teaching Practices     | Approach  | SAP |
| Mascret et al. 2015 B | SAP2L | 0.02  | 304 | 0.06 | Learning          | Performance Teaching Practices | Approach  | SAP |
| Mascret et al. 2015 B | SAV1L | 0.00  | 304 | 0.06 | Learning          | Mastery Teaching Practices     | Avoidance | SAV |
| Mascret et al. 2015 B | SAV2L | 0.07  | 304 | 0.06 | Learning          | Performance Teaching Practices | Avoidance | SAV |
| Mascret et al. 2015 B | TAP1L | 0.11  | 304 | 0.06 | Learning          | Mastery Teaching Practices     | Approach  | TAP |
| Mascret et al. 2015 B | TAP2L | -0.13 | 304 | 0.06 | Learning          | Performance Teaching Practices | Approach  | TAP |
| Mascret et al. 2015 B | TAV1L | 0.09  | 304 | 0.06 | Learning          | Mastery Teaching Practices     | Avoidance | TAV |
| Mascret et al. 2015 B | TAV2L | -0.07 | 304 | 0.06 | Learning          | Performance Teaching Practices | Avoidance | TAV |
| Mascret et al. 2015 B | OAP1M | -0.04 | 304 | 0.06 | Motivation        | Intrinsic Interest             | Approach  | OAP |
| Mascret et al. 2015 B | OAV1M | 0.09  | 304 | 0.06 | Motivation        | Intrinsic Interest             | Avoidance | OAV |
| Mascret et al. 2015 B | SAP1M | 0.21  | 304 | 0.06 | Motivation        | Intrinsic Interest             | Approach  | SAP |
| Mascret et al. 2015 B | SAV1M | 0.08  | 304 | 0.06 | Motivation        | Intrinsic Interest             | Avoidance | SAV |
| Mascret et al. 2015 B | TAP1M | 0.24  | 304 | 0.05 | Motivation        | Intrinsic Interest             | Approach  | TAP |
| Mascret et al. 2015 B | TAV1M | 0.31  | 304 | 0.05 | Motivation        | Intrinsic Interest             | Avoidance | TAV |
| Mascret et al. 2022   | OAP1  | -0.01 | 38  | 0.17 | Negative Emotions | Cognitive Anxiety (pre stress) | Approach  | OAP |
| Mascret et al. 2022   | OAP2  | 0.14  | 38  | 0.17 | Negative Emotions | Somatic Anxiety (pre stress)   | Approach  | OAP |
| Mascret et al. 2022   | OAP3  | -0.03 | 38  | 0.17 | Negative Emotions | Cognitive Anxiety (pre stress) | Approach  | OAP |
| Mascret et al. 2022   | OAP4  | 0.26  | 38  | 0.16 | Negative Emotions | Somatic Anxiety (pre stress)   | Approach  | OAP |

|                              |       |       |      |      |                   |                                 |           |     |
|------------------------------|-------|-------|------|------|-------------------|---------------------------------|-----------|-----|
| Mascret et al. 2022          | OAV1  | -0.01 | 38   | 0.17 | Negative Emotions | Cognitive Anxiety (post stress) | Avoidance | OAV |
| Mascret et al. 2022          | OAV2  | -0.08 | 38   | 0.17 | Negative Emotions | Somatic Anxiety (post stress)   | Avoidance | OAV |
| Mascret et al. 2022          | OAV3  | -0.01 | 38   | 0.17 | Negative Emotions | Cognitive Anxiety (post stress) | Avoidance | OAV |
| Mascret et al. 2022          | OAV4  | 0.11  | 38   | 0.17 | Negative Emotions | Somatic Anxiety (post stress)   | Avoidance | OAV |
| Mascret et al. 2022          | OAP1P | 0.04  | 38   | 0.17 | Performance       | Pre stress                      | Approach  | OAP |
| Mascret et al. 2022          | OAP2P | -0.10 | 38   | 0.17 | Performance       | Pre stress                      | Approach  | OAP |
| Mascret et al. 2022          | OAV1P | 0.49  | 38   | 0.13 | Performance       | Post stress                     | Avoidance | OAV |
| Mascret et al. 2022          | OAV2P | -0.02 | 38   | 0.17 | Performance       | Post stress                     | Avoidance | OAV |
| Méndez-Giménez et al. 2017 A | OAP1M | 0.27  | 1347 | 0.03 | Motivation        | Intrinsic Motivation            | Approach  | OAP |
| Méndez-Giménez et al. 2017 A | OAV1M | 0.31  | 1347 | 0.02 | Motivation        | Intrinsic Motivation            | Avoidance | OAV |
| Méndez-Giménez et al. 2017 A | SAP1M | 0.48  | 1347 | 0.02 | Motivation        | Intrinsic Motivation            | Approach  | SAP |
| Méndez-Giménez et al. 2017 A | SAV1M | 0.38  | 1347 | 0.02 | Motivation        | Intrinsic Motivation            | Avoidance | SAV |
| Méndez-Giménez et al. 2017 A | TAP1M | 0.45  | 1347 | 0.02 | Motivation        | Intrinsic Motivation            | Approach  | TAP |
| Méndez-Giménez et al. 2017 A | TAV1M | 0.40  | 1347 | 0.02 | Motivation        | Intrinsic Motivation            | Avoidance | TAV |
| Méndez-Giménez et al. 2017 A | OAP2M | 0.17  | 1347 | 0.03 | Motivation (Ext)  | External Regulation             | Approach  | OAP |
| Méndez-Giménez et al. 2017 A | OAV2M | 0.18  | 1347 | 0.03 | Motivation (Ext)  | External Regulation             | Avoidance | OAV |
| Méndez-Giménez et al. 2017 A | SAP2M | 0.18  | 1347 | 0.03 | Motivation (Ext)  | External Regulation             | Approach  | SAP |
| Méndez-Giménez et al. 2017 A | SAV2M | 0.23  | 1347 | 0.03 | Motivation (Ext)  | External Regulation             | Avoidance | SAV |
| Méndez-Giménez et al. 2017 A | TAP2M | 0.22  | 1347 | 0.03 | Motivation (Ext)  | External Regulation             | Approach  | TAP |
| Méndez-Giménez et al. 2017 A | TAV2M | 0.23  | 1347 | 0.03 | Motivation (Ext)  | External Regulation             | Avoidance | TAV |
| Méndez-Giménez et al. 2017 A | OAP2  | 0.15  | 1347 | 0.03 | Negative Emotions | Negative Affect                 | Approach  | OAP |
| Méndez-Giménez et al. 2017 A | OAV2  | 0.09  | 1347 | 0.03 | Negative Emotions | Negative Affect                 | Avoidance | OAV |
| Méndez-Giménez et al. 2017 A | SAP2  | -0.02 | 1347 | 0.03 | Negative Emotions | Negative Affect                 | Approach  | SAP |
| Méndez-Giménez et al. 2017 A | SAV2  | 0.03  | 1347 | 0.03 | Negative Emotions | Negative Affect                 | Avoidance | SAV |
| Méndez-Giménez et al. 2017 A | TAP2  | 0.01  | 1347 | 0.03 | Negative Emotions | Negative Affect                 | Approach  | TAP |
| Méndez-Giménez et al. 2017 A | TAV2  | 0.01  | 1347 | 0.03 | Negative Emotions | Negative Affect                 | Avoidance | TAV |
| Méndez-Giménez et al. 2017 A | OAP1  | 0.21  | 1347 | 0.03 | Positive Emotions | Positive Affect                 | Approach  | OAP |
| Méndez-Giménez et al. 2017 A | OAV1  | 0.20  | 1347 | 0.03 | Positive Emotions | Positive Affect                 | Avoidance | OAV |

|                                |       |       |      |      |                   |                                |           |     |
|--------------------------------|-------|-------|------|------|-------------------|--------------------------------|-----------|-----|
| Méndez-Giménez et al. 2017 A   | SAP1  | 0.33  | 1347 | 0.02 | Positive Emotions | Positive Affect                | Approach  | SAP |
| Méndez-Giménez et al. 2017 A   | SAV1  | 0.28  | 1347 | 0.03 | Positive Emotions | Positive Affect                | Avoidance | SAV |
| Méndez-Giménez et al. 2017 A   | TAP1  | 0.33  | 1347 | 0.02 | Positive Emotions | Positive Affect                | Approach  | TAP |
| Méndez-Giménez et al. 2017 A   | TAV1  | 0.27  | 1347 | 0.03 | Positive Emotions | Positive Affect                | Avoidance | TAV |
| Méndez-Giménez et al. 2017 B   | OAP1M | 0.11  | 2630 | 0.02 | Motivation        | SDI                            | Approach  | OAP |
| Méndez-Giménez et al. 2017 B   | OAV1M | 0.15  | 2630 | 0.02 | Motivation        | SDI                            | Avoidance | OAV |
| Méndez-Giménez et al. 2017 B   | SAP1M | 0.53  | 2630 | 0.01 | Motivation        | SDI                            | Approach  | SAP |
| Méndez-Giménez et al. 2017 B   | SAV1M | 0.32  | 2630 | 0.02 | Motivation        | SDI                            | Avoidance | SAV |
| Méndez-Giménez et al. 2017 B   | TAP1M | 0.37  | 2630 | 0.02 | Motivation        | SDI                            | Approach  | TAP |
| Méndez-Giménez et al. 2017 B   | TAV1M | 0.26  | 2630 | 0.02 | Motivation        | SDI                            | Avoidance | TAV |
| Méndez-Giménez et al. 2017 B   | OAP1  | 0.17  | 2630 | 0.02 | Positive Emotions | Satisfaction w Life            | Approach  | OAP |
| Méndez-Giménez et al. 2017 B   | OAV1  | 0.15  | 2630 | 0.02 | Positive Emotions | Satisfaction w Life            | Avoidance | OAV |
| Méndez-Giménez et al. 2017 B   | SAP1  | 0.32  | 2630 | 0.02 | Positive Emotions | Satisfaction w Life            | Approach  | SAP |
| Méndez-Giménez et al. 2017 B   | SAV1  | 0.21  | 2630 | 0.02 | Positive Emotions | Satisfaction w Life            | Avoidance | SAV |
| Méndez-Giménez et al. 2017 B   | TAP1  | 0.27  | 2630 | 0.02 | Positive Emotions | Satisfaction w Life            | Approach  | TAP |
| Méndez-Giménez et al. 2017 B   | TAV1  | 0.20  | 2630 | 0.02 | Positive Emotions | Satisfaction w Life            | Avoidance | TAV |
| Méndez-Giménez et al. 2018a    | OAP1M | 0.22  | 1689 | 0.02 | Motivation        | Relatedness Needs Satisfaction | Approach  | OAP |
| Méndez-Giménez et al. 2018a    | OAV1M | 0.24  | 1689 | 0.02 | Motivation        | Relatedness Needs Satisfaction | Avoidance | OAV |
| Méndez-Giménez et al. 2018a    | SAP1M | 0.43  | 1689 | 0.02 | Motivation        | Relatedness Needs Satisfaction | Approach  | SAP |
| Méndez-Giménez et al. 2018a    | SAV1M | 0.30  | 1689 | 0.02 | Motivation        | Relatedness Needs Satisfaction | Avoidance | SAV |
| Méndez-Giménez et al. 2018a    | TAP1M | 0.46  | 1689 | 0.02 | Motivation        | Relatedness Needs Satisfaction | Approach  | TAP |
| Méndez-Giménez et al. 2018a    | TAV1M | 0.33  | 1689 | 0.02 | Motivation        | Relatedness Needs Satisfaction | Avoidance | TAV |
| Méndez-Giménez et al. 2018b S1 | OAP2  | 0.13  | 405  | 0.05 | Negative Emotions | Negative Affect                | Approach  | OAP |
| Méndez-Giménez et al. 2018b S1 | OAV2  | 0.10  | 405  | 0.05 | Negative Emotions | Negative Affect                | Avoidance | OAV |
| Méndez-Giménez et al. 2018b S1 | SAP2  | -0.10 | 405  | 0.05 | Negative Emotions | Negative Affect                | Approach  | SAP |

|                                |      |       |     |      |                   |                 |           |     |
|--------------------------------|------|-------|-----|------|-------------------|-----------------|-----------|-----|
| Méndez-Giménez et al. 2018b S1 | SAV2 | -0.01 | 405 | 0.05 | Negative Emotions | Negative Affect | Avoidance | SAV |
| Méndez-Giménez et al. 2018b S1 | TAP2 | 0.01  | 405 | 0.05 | Negative Emotions | Negative Affect | Approach  | TAP |
| Méndez-Giménez et al. 2018b S1 | TAV2 | -0.02 | 405 | 0.05 | Negative Emotions | Negative Affect | Avoidance | TAV |
| Méndez-Giménez et al. 2018b S1 | OAP1 | 0.17  | 405 | 0.05 | Positive Emotions | Positive Affect | Approach  | OAP |
| Méndez-Giménez et al. 2018b S1 | OAV1 | 0.26  | 405 | 0.05 | Positive Emotions | Positive Affect | Avoidance | OAV |
| Méndez-Giménez et al. 2018b S1 | SAP1 | 0.32  | 405 | 0.04 | Positive Emotions | Positive Affect | Approach  | SAP |
| Méndez-Giménez et al. 2018b S1 | SAV1 | 0.26  | 405 | 0.05 | Positive Emotions | Positive Affect | Avoidance | SAV |
| Méndez-Giménez et al. 2018b S1 | TAP1 | 0.32  | 405 | 0.04 | Positive Emotions | Positive Affect | Approach  | TAP |
| Méndez-Giménez et al. 2018b S1 | TAV1 | 0.30  | 405 | 0.05 | Positive Emotions | Positive Affect | Avoidance | TAV |
| Méndez-Giménez et al. 2018b S2 | OAP4 | 0.12  | 646 | 0.04 | Negative Emotions | Negative Affect | Approach  | OAP |
| Méndez-Giménez et al. 2018b S2 | OAV4 | 0.06  | 646 | 0.04 | Negative Emotions | Negative Affect | Avoidance | OAV |
| Méndez-Giménez et al. 2018b S2 | SAP4 | -0.08 | 646 | 0.04 | Negative Emotions | Negative Affect | Approach  | SAP |
| Méndez-Giménez et al. 2018b S2 | SAV4 | -0.03 | 646 | 0.04 | Negative Emotions | Negative Affect | Avoidance | SAV |
| Méndez-Giménez et al. 2018b S2 | TAP4 | 0.10  | 646 | 0.04 | Negative Emotions | Negative Affect | Approach  | TAP |
| Méndez-Giménez et al. 2018b S2 | TAV4 | 0.04  | 646 | 0.04 | Negative Emotions | Negative Affect | Avoidance | TAV |
| Méndez-Giménez et al. 2018b S2 | OAP3 | 0.21  | 646 | 0.04 | Positive Emotions | Positive Affect | Approach  | OAP |
| Méndez-Giménez et al. 2018b S2 | OAV3 | 0.18  | 646 | 0.04 | Positive Emotions | Positive Affect | Avoidance | OAV |
| Méndez-Giménez et al. 2018b S2 | SAP3 | 0.37  | 646 | 0.03 | Positive Emotions | Positive Affect | Approach  | SAP |

|                                   |       |       |      |      |                   |                 |           |     |
|-----------------------------------|-------|-------|------|------|-------------------|-----------------|-----------|-----|
| Méndez-Giménez et al. 2018b<br>S2 | SAV3  | 0.27  | 646  | 0.04 | Positive Emotions | Positive Affect | Avoidance | SAV |
| Méndez-Giménez et al. 2018b<br>S2 | TAP3  | 0.26  | 646  | 0.04 | Positive Emotions | Positive Affect | Approach  | TAP |
| Méndez-Giménez et al. 2018b<br>S2 | TAV3  | 0.27  | 646  | 0.04 | Positive Emotions | Positive Affect | Avoidance | TAV |
| Méndez-Giménez et al. 2018b<br>S3 | OAP6  | 0.00  | 559  | 0.04 | Negative Emotions | Negative Affect | Approach  | OAP |
| Méndez-Giménez et al. 2018b<br>S3 | OAV6  | 0.00  | 559  | 0.04 | Negative Emotions | Negative Affect | Avoidance | OAV |
| Méndez-Giménez et al. 2018b<br>S3 | SAP6  | -0.06 | 559  | 0.04 | Negative Emotions | Negative Affect | Approach  | SAP |
| Méndez-Giménez et al. 2018b<br>S3 | SAV6  | -0.03 | 559  | 0.04 | Negative Emotions | Negative Affect | Avoidance | SAV |
| Méndez-Giménez et al. 2018b<br>S3 | TAP6  | 0.00  | 559  | 0.04 | Negative Emotions | Negative Affect | Approach  | TAP |
| Méndez-Giménez et al. 2018b<br>S3 | TAV6  | 0.08  | 559  | 0.04 | Negative Emotions | Negative Affect | Avoidance | TAV |
| Méndez-Giménez et al. 2018b<br>S3 | OAP5  | 0.19  | 559  | 0.04 | Positive Emotions | Positive Affect | Approach  | OAP |
| Méndez-Giménez et al. 2018b<br>S3 | OAV5  | 0.23  | 559  | 0.04 | Positive Emotions | Positive Affect | Avoidance | OAV |
| Méndez-Giménez et al. 2018b<br>S3 | SAP5  | 0.35  | 559  | 0.04 | Positive Emotions | Positive Affect | Approach  | SAP |
| Méndez-Giménez et al. 2018b<br>S3 | SAV5  | 0.31  | 559  | 0.04 | Positive Emotions | Positive Affect | Avoidance | SAV |
| Méndez-Giménez et al. 2018b<br>S3 | TAP5  | 0.31  | 559  | 0.04 | Positive Emotions | Positive Affect | Approach  | TAP |
| Méndez-Giménez et al. 2018b<br>S3 | TAV5  | 0.29  | 559  | 0.04 | Positive Emotions | Positive Affect | Avoidance | TAV |
| Méndez-Giménez et al. 2018c       | OAP1M | 0.06  | 2284 | 0.02 | Motivation        | Autonomy Index  | Approach  | OAP |
| Méndez-Giménez et al. 2018c       | OAV1M | 0.11  | 2284 | 0.02 | Motivation        | Autonomy Index  | Avoidance | OAV |
| Méndez-Giménez et al. 2018c       | SAP1M | 0.53  | 2284 | 0.02 | Motivation        | Autonomy Index  | Approach  | SAP |
| Méndez-Giménez et al. 2018c       | SAV1M | 0.31  | 2284 | 0.02 | Motivation        | Autonomy Index  | Avoidance | SAV |
| Méndez-Giménez et al. 2018c       | TAP1M | 0.35  | 2284 | 0.02 | Motivation        | Autonomy Index  | Approach  | TAP |
| Méndez-Giménez et al. 2018c       | TAV1M | 0.24  | 2284 | 0.02 | Motivation        | Autonomy Index  | Avoidance | TAV |



|                            |        |       |      |      |                   |                           |           |     |
|----------------------------|--------|-------|------|------|-------------------|---------------------------|-----------|-----|
| Rivera-Pérez et al. 2021 B | SAP1L  | 0.35  | 1328 | 0.02 | Learning          | Group Processing          | Approach  | SAP |
| Rivera-Pérez et al. 2021 B | SAP2L  | 0.40  | 1328 | 0.02 | Learning          | Positive Interdependence  | Approach  | SAP |
| Rivera-Pérez et al. 2021 B | SAP3L  | 0.37  | 1328 | 0.02 | Learning          | Promotive Interaction     | Approach  | SAP |
| Rivera-Pérez et al. 2021 B | SAP4L  | 0.46  | 1328 | 0.02 | Learning          | Individual Accountability | Approach  | SAP |
| Rivera-Pérez et al. 2021 B | SAP5L  | 0.32  | 1328 | 0.02 | Learning          | Interpersonal Skills      | Approach  | SAP |
| Rivera-Pérez et al. 2021 B | TAP1L  | 0.30  | 1328 | 0.02 | Learning          | Group Processing          | Approach  | TAP |
| Rivera-Pérez et al. 2021 B | TAP2L  | 0.39  | 1328 | 0.02 | Learning          | Positive Interdependence  | Approach  | TAP |
| Rivera-Pérez et al. 2021 B | TAP3L  | 0.35  | 1328 | 0.02 | Learning          | Promotive Interaction     | Approach  | TAP |
| Rivera-Pérez et al. 2021 B | TAP4L  | 0.48  | 1328 | 0.02 | Learning          | Individual Accountability | Approach  | TAP |
| Rivera-Pérez et al. 2021 B | TAP5L  | 0.29  | 1328 | 0.03 | Learning          | Interpersonal Skills      | Approach  | TAP |
| Sari et al. 2020           | OAP1L  | 0.30  | 424  | 0.04 | Learning          | Effort                    | Approach  | OAP |
| Sari et al. 2020           | OAP2L  | 0.33  | 424  | 0.04 | Learning          | Concentration             | Approach  | OAP |
| Sari et al. 2020           | OAV1L  | -0.12 | 424  | 0.05 | Learning          | Effort                    | Avoidance | OAV |
| Sari et al. 2020           | OAV2L  | -0.18 | 424  | 0.05 | Learning          | Concentration             | Avoidance | OAV |
| Sari et al. 2020           | TAP1L  | 0.68  | 424  | 0.03 | Learning          | Effort                    | Approach  | TAP |
| Sari et al. 2020           | TAP2L  | 0.60  | 424  | 0.03 | Learning          | Concentration             | Approach  | TAP |
| Sari et al. 2020           | TAV1L  | 0.60  | 424  | 0.03 | Learning          | Effort                    | Avoidance | TAV |
| Sari et al. 2020           | TAV2L  | 0.47  | 424  | 0.04 | Learning          | Concentration             | Avoidance | TAV |
| Sari et al. 2020           | OAP2   | -0.08 | 424  | 0.05 | Negative Emotions | Anxiety                   | Approach  | OAP |
| Sari et al. 2020           | OAV2   | 0.16  | 424  | 0.05 | Negative Emotions | Anxiety                   | Avoidance | OAV |
| Sari et al. 2020           | TAP2   | -0.20 | 424  | 0.05 | Negative Emotions | Anxiety                   | Approach  | TAP |
| Sari et al. 2020           | TAV2   | -0.18 | 424  | 0.05 | Negative Emotions | Anxiety                   | Avoidance | TAV |
| Sari et al. 2020           | OAP1   | 0.33  | 424  | 0.04 | Positive Emotions | Enjoyment                 | Approach  | OAP |
| Sari et al. 2020           | OAV1   | -0.24 | 424  | 0.05 | Positive Emotions | Enjoyment                 | Avoidance | OAV |
| Sari et al. 2020           | TAP1   | 0.60  | 424  | 0.03 | Positive Emotions | Enjoyment                 | Approach  | TAP |
| Sari et al. 2020           | TAV1   | 0.70  | 424  | 0.02 | Positive Emotions | Enjoyment                 | Avoidance | TAV |
| Shen et al. 2020           | OAP1IP | -0.13 | 792  | 0.03 | Performance       | 50m Dash                  | Approach  | OAP |

|                  |        |       |     |      |              |                          |           |     |
|------------------|--------|-------|-----|------|--------------|--------------------------|-----------|-----|
| Shen et al. 2020 | OAP2P  | 0.13  | 792 | 0.03 | Performance  | Standing Long Jump       | Approach  | OAP |
| Shen et al. 2020 | OAV1IP | 0.04  | 792 | 0.04 | Performance  | 50m Dash                 | Avoidance | OAV |
| Shen et al. 2020 | OAV2P  | 0.03  | 792 | 0.04 | Performance  | Standing Long Jump       | Avoidance | OAV |
| Shen et al. 2020 | SAP1IP | -0.12 | 792 | 0.04 | Performance  | 50m Dash                 | Approach  | SAP |
| Shen et al. 2020 | SAP2P  | 0.14  | 792 | 0.03 | Performance  | Standing Long Jump       | Approach  | SAP |
| Shen et al. 2020 | SAV1IP | 0.01  | 792 | 0.04 | Performance  | 50m Dash                 | Avoidance | SAV |
| Shen et al. 2020 | SAV2P  | 0.02  | 792 | 0.04 | Performance  | Standing Long Jump       | Avoidance | SAV |
| Shen et al. 2020 | TAP1IP | -0.10 | 792 | 0.04 | Performance  | 50m Dash                 | Approach  | TAP |
| Shen et al. 2020 | TAP2P  | 0.14  | 792 | 0.03 | Performance  | Standing Long Jump       | Approach  | TAP |
| Shen et al. 2020 | TAV1IP | 0.01  | 792 | 0.04 | Performance  | 50m Dash                 | Avoidance | TAV |
| Shen et al. 2020 | TAV2P  | 0.01  | 792 | 0.04 | Performance  | Standing Long Jump       | Avoidance | TAV |
| Thomas 2022      | OAP2L  | 0.21  | 482 | 0.04 | Learning     | Task-Value               | Approach  | OAP |
| Thomas 2022      | OAP3L  | 0.27  | 482 | 0.04 | Learning     | Self-Efficacy            | Approach  | OAP |
| Thomas 2022      | OAV2L  | 0.25  | 482 | 0.04 | Learning     | Task-Value               | Avoidance | OAV |
| Thomas 2022      | OAV3L  | 0.28  | 482 | 0.04 | Learning     | Self-Efficacy            | Avoidance | OAV |
| Thomas 2022      | SAP2L  | 0.37  | 482 | 0.04 | Learning     | Task-Value               | Approach  | SAP |
| Thomas 2022      | SAP3L  | 0.34  | 482 | 0.04 | Learning     | Self-Efficacy            | Approach  | SAP |
| Thomas 2022      | SAV2L  | 0.26  | 482 | 0.04 | Learning     | Task-Value               | Avoidance | SAV |
| Thomas 2022      | SAV3L  | 0.23  | 482 | 0.04 | Learning     | Self-Efficacy            | Avoidance | SAV |
| Thomas 2022      | TAP2L  | 0.39  | 482 | 0.04 | Learning     | Task-Value               | Approach  | TAP |
| Thomas 2022      | TAP3L  | 0.42  | 482 | 0.04 | Learning     | Self-Efficacy            | Approach  | TAP |
| Thomas 2022      | TAV2L  | 0.35  | 482 | 0.04 | Learning     | Task-Value               | Avoidance | TAV |
| Thomas 2022      | TAV3L  | 0.36  | 482 | 0.04 | Learning     | Self-Efficacy            | Avoidance | TAV |
| Thomas 2022      | OAP1L  | 0.08  | 482 | 0.05 | Learning (D) | Test Irrelevant Thinking | Approach  | OAP |
| Thomas 2022      | OAV1L  | 0.10  | 482 | 0.05 | Learning (D) | Test Irrelevant Thinking | Avoidance | OAV |

|              |       |       |     |      |                   |                          |           |     |
|--------------|-------|-------|-----|------|-------------------|--------------------------|-----------|-----|
| Thomas 2022  | SAP1L | 0.00  | 482 | 0.05 | Learning (D)      | Test Irrelevant Thinking | Approach  | SAP |
| Thomas 2022  | SAV1L | 0.00  | 482 | 0.05 | Learning (D)      | Test Irrelevant Thinking | Avoidance | SAV |
| Thomas 2022  | TAP1L | -0.14 | 482 | 0.04 | Learning (D)      | Test Irrelevant Thinking | Approach  | TAP |
| Thomas 2022  | TAV1L | -0.06 | 482 | 0.05 | Learning (D)      | Test Irrelevant Thinking | Avoidance | TAV |
| Thomas 2022  | OAP1  | 0.11  | 482 | 0.05 | Negative Emotions | Worry                    | Approach  | OAP |
| Thomas 2022  | OAP2  | 0.10  | 482 | 0.05 | Negative Emotions | Tension                  | Approach  | OAP |
| Thomas 2022  | OAP3  | 0.09  | 482 | 0.05 | Negative Emotions | Bodily Symptoms          | Approach  | OAP |
| Thomas 2022  | OAV1  | 0.14  | 482 | 0.04 | Negative Emotions | Worry                    | Avoidance | OAV |
| Thomas 2022  | OAV2  | 0.11  | 482 | 0.05 | Negative Emotions | Tension                  | Avoidance | OAV |
| Thomas 2022  | OAV3  | 0.08  | 482 | 0.05 | Negative Emotions | Bodily Symptoms          | Avoidance | OAV |
| Thomas 2022  | SAP1  | 0.08  | 482 | 0.05 | Negative Emotions | Worry                    | Approach  | SAP |
| Thomas 2022  | SAP2  | 0.11  | 482 | 0.05 | Negative Emotions | Tension                  | Approach  | SAP |
| Thomas 2022  | SAP3  | 0.03  | 482 | 0.05 | Negative Emotions | Bodily Symptoms          | Approach  | SAP |
| Thomas 2022  | SAV1  | 0.09  | 482 | 0.05 | Negative Emotions | Worry                    | Avoidance | SAV |
| Thomas 2022  | SAV2  | 0.11  | 482 | 0.05 | Negative Emotions | Tension                  | Avoidance | SAV |
| Thomas 2022  | SAV3  | 0.03  | 482 | 0.05 | Negative Emotions | Bodily Symptoms          | Avoidance | SAV |
| Thomas 2022  | TAP1  | -0.06 | 482 | 0.05 | Negative Emotions | Worry                    | Approach  | TAP |
| Thomas 2022  | TAP2  | 0.01  | 482 | 0.05 | Negative Emotions | Tension                  | Approach  | TAP |
| Thomas 2022  | TAP3  | -0.07 | 482 | 0.05 | Negative Emotions | Bodily Symptoms          | Approach  | TAP |
| Thomas 2022  | TAV1  | 0.01  | 482 | 0.05 | Negative Emotions | Worry                    | Avoidance | TAV |
| Thomas 2022  | TAV2  | 0.07  | 482 | 0.05 | Negative Emotions | Tension                  | Avoidance | TAV |
| Thomas 2022  | TAV3  | -0.03 | 482 | 0.05 | Negative Emotions | Bodily Symptoms          | Avoidance | TAV |
| Üztemur 2020 | OAP1L | -0.29 | 259 | 0.06 | Learning          | Deep Learning            | Approach  | OAP |
| Üztemur 2020 | OAV1L | -0.20 | 259 | 0.06 | Learning          | Deep Learning            | Avoidance | OAV |
| Üztemur 2020 | SAP1L | 0.69  | 259 | 0.03 | Learning          | Deep Learning            | Approach  | SAP |
| Üztemur 2020 | SAV1L | 0.12  | 259 | 0.06 | Learning          | Deep Learning            | Avoidance | SAV |
| Üztemur 2020 | TAP1L | 0.38  | 259 | 0.05 | Learning          | Deep Learning            | Approach  | TAP |
| Üztemur 2020 | TAV1L | 0.47  | 259 | 0.05 | Learning          | Deep Learning            | Avoidance | TAV |

|                 |       |       |     |      |                   |                                    |           |     |
|-----------------|-------|-------|-----|------|-------------------|------------------------------------|-----------|-----|
| Üztemur 2020    | OAP2L | 0.41  | 259 | 0.05 | Learning (D)      | Surface Learning                   | Approach  | OAP |
| Üztemur 2020    | OAV2L | 0.32  | 259 | 0.06 | Learning (D)      | Surface Learning                   | Avoidance | OAV |
| Üztemur 2020    | SAP2L | -0.55 | 259 | 0.04 | Learning (D)      | Surface Learning                   | Approach  | SAP |
| Üztemur 2020    | SAV2L | 0.00  | 259 | 0.06 | Learning (D)      | Surface Learning                   | Avoidance | SAV |
| Üztemur 2020    | TAP2L | -0.29 | 259 | 0.06 | Learning (D)      | Surface Learning                   | Approach  | TAP |
| Üztemur 2020    | TAV2L | -0.33 | 259 | 0.06 | Learning (D)      | Surface Learning                   | Avoidance | TAV |
| Van Yperen 2022 | OAP1M | 0.27  | 647 | 0.04 | Motivation        | Competence Satisfaction            | Approach  | OAP |
| Van Yperen 2022 | OAV1M | 0.09  | 647 | 0.04 | Motivation        | Competence Satisfaction            | Avoidance | OAV |
| Van Yperen 2022 | SAP1M | 0.26  | 647 | 0.04 | Motivation        | Competence Satisfaction            | Approach  | SAP |
| Van Yperen 2022 | SAV1M | 0.06  | 647 | 0.04 | Motivation        | Competence Satisfaction            | Avoidance | SAV |
| Van Yperen 2022 | TAP1M | 0.23  | 647 | 0.04 | Motivation        | Competence Satisfaction            | Approach  | TAP |
| Van Yperen 2022 | TAV1M | 0.06  | 647 | 0.04 | Motivation        | Competence Satisfaction            | Avoidance | TAV |
| Van Yperen 2022 | OAP1  | 0.21  | 647 | 0.04 | Positive Emotions | Satisfaction with Win              | Approach  | OAP |
| Van Yperen 2022 | OAP2  | -0.28 | 647 | 0.04 | Positive Emotions | Satisfaction with Best Performance | Approach  | OAP |
| Van Yperen 2022 | OAV1  | 0.18  | 647 | 0.04 | Positive Emotions | Satisfaction with Win              | Avoidance | OAV |
| Van Yperen 2022 | OAV2  | -0.14 | 647 | 0.04 | Positive Emotions | Satisfaction with Best Performance | Avoidance | OAV |
| Van Yperen 2022 | SAP1  | 0.06  | 647 | 0.04 | Positive Emotions | Satisfaction with Win              | Approach  | SAP |
| Van Yperen 2022 | SAP2  | -0.05 | 647 | 0.04 | Positive Emotions | Satisfaction with Best Performance | Approach  | SAP |
| Van Yperen 2022 | SAV1  | -0.04 | 647 | 0.04 | Positive Emotions | Satisfaction with Win              | Avoidance | SAV |
| Van Yperen 2022 | SAV2  | 0.02  | 647 | 0.04 | Positive Emotions | Satisfaction with Best Performance | Avoidance | SAV |
| Van Yperen 2022 | TAP1  | 0.03  | 647 | 0.04 | Positive Emotions | Satisfaction with Win              | Approach  | TAP |

|                  |        |       |     |      |                       |                                    |           |     |
|------------------|--------|-------|-----|------|-----------------------|------------------------------------|-----------|-----|
| Van Yperen 2022  | TAP2   | -0.06 | 647 | 0.04 | Positive Emotions     | Satisfaction with Best Performance | Approach  | TAP |
| Van Yperen 2022  | TAV1   | -0.03 | 647 | 0.04 | Positive Emotions     | Satisfaction with Win              | Avoidance | TAV |
| Van Yperen 2022  | TAV2   | -0.04 | 647 | 0.04 | Positive Emotions     | Satisfaction with Best Performance | Avoidance | TAV |
| Wang et al. 2017 | OAP12D | 0.11  | 475 | 0.05 | Individual Difference | Incremental Theory                 | Approach  | OAP |
| Wang et al. 2017 | OAP1ID | 0.08  | 475 | 0.05 | Individual Difference | Entity Theory                      | Approach  | OAP |
| Wang et al. 2017 | OAV12D | -0.07 | 475 | 0.05 | Individual Difference | Incremental Theory                 | Avoidance | OAV |
| Wang et al. 2017 | OAV1ID | 0.23  | 475 | 0.04 | Individual Difference | Entity Theory                      | Avoidance | OAV |
| Wang et al. 2017 | SAP12D | 0.46  | 475 | 0.04 | Individual Difference | Incremental Theory                 | Approach  | SAP |
| Wang et al. 2017 | SAP1ID | -0.24 | 475 | 0.04 | Individual Difference | Entity Theory                      | Approach  | SAP |
| Wang et al. 2017 | SAV12D | 0.16  | 475 | 0.04 | Individual Difference | Incremental Theory                 | Avoidance | SAV |
| Wang et al. 2017 | SAV1ID | 0.02  | 475 | 0.05 | Individual Difference | Entity Theory                      | Avoidance | SAV |
| Wang et al. 2017 | TAP12D | 0.54  | 475 | 0.03 | Individual Difference | Incremental Theory                 | Approach  | TAP |
| Wang et al. 2017 | TAP1ID | -0.29 | 475 | 0.04 | Individual Difference | Entity Theory                      | Approach  | TAP |
| Wang et al. 2017 | TAV12D | 0.30  | 475 | 0.04 | Individual Difference | Incremental Theory                 | Avoidance | TAV |
| Wang et al. 2017 | TAV1ID | -0.17 | 475 | 0.04 | Individual Difference | Entity Theory                      | Avoidance | TAV |
| Wang et al. 2017 | OAP1M  | 0.08  | 475 | 0.05 | Motivation            | Intrinsic Motivation               | Approach  | OAP |
| Wang et al. 2017 | OAP2M  | 0.15  | 475 | 0.04 | Motivation            | Perceived Competence               | Approach  | OAP |
| Wang et al. 2017 | OAV1M  | -0.07 | 475 | 0.05 | Motivation            | Intrinsic Motivation               | Avoidance | OAV |
| Wang et al. 2017 | OAV2M  | -0.07 | 475 | 0.05 | Motivation            | Perceived Competence               | Avoidance | OAV |
| Wang et al. 2017 | SAP1M  | 0.40  | 475 | 0.04 | Motivation            | Intrinsic Motivation               | Approach  | SAP |

|                     |       |       |     |      |                   |                          |           |     |
|---------------------|-------|-------|-----|------|-------------------|--------------------------|-----------|-----|
| Wang et al. 2017    | SAP2M | 0.24  | 475 | 0.04 | Motivation        | Perceived Competence     | Approach  | SAP |
| Wang et al. 2017    | SAV1M | 0.19  | 475 | 0.04 | Motivation        | Intrinsic Motivation     | Avoidance | SAV |
| Wang et al. 2017    | SAV2M | -0.05 | 475 | 0.05 | Motivation        | Perceived Competence     | Avoidance | SAV |
| Wang et al. 2017    | TAP1M | 0.49  | 475 | 0.03 | Motivation        | Intrinsic Motivation     | Approach  | TAP |
| Wang et al. 2017    | TAP2M | 0.29  | 475 | 0.04 | Motivation        | Perceived Competence     | Approach  | TAP |
| Wang et al. 2017    | TAV1M | 0.29  | 475 | 0.04 | Motivation        | Intrinsic Motivation     | Avoidance | TAV |
| Wang et al. 2017    | TAV2M | 0.20  | 475 | 0.04 | Motivation        | Perceived Competence     | Avoidance | TAV |
| Wei et al. 2020     | OAP1  | 0.26  | 406 | 0.05 | Positive Emotions | Psychological Well-Being | Approach  | OAP |
| Wei et al. 2020     | OAV1  | 0.23  | 406 | 0.05 | Positive Emotions | Psychological Well-Being | Avoidance | OAV |
| Wei et al. 2020     | SAP1  | 0.37  | 406 | 0.04 | Positive Emotions | Psychological Well-Being | Approach  | SAP |
| Wei et al. 2020     | SAV1  | 0.28  | 406 | 0.05 | Positive Emotions | Psychological Well-Being | Avoidance | SAV |
| Wei et al. 2020     | TAP1  | 0.43  | 406 | 0.04 | Positive Emotions | Psychological Well-Being | Approach  | TAP |
| Wei et al. 2020     | TAV1  | 0.14  | 406 | 0.05 | Positive Emotions | Psychological Well-Being | Avoidance | TAV |
| Yang & Cao 2013     | OAP1M | 0.18  | 93  | 0.10 | Motivation        | Intrinsic Motivation     | Approach  | OAP |
| Yang & Cao 2013     | SAP1M | 0.40  | 93  | 0.09 | Motivation        | Intrinsic Motivation     | Approach  | SAP |
| Yang & Cao 2013     | TAP1M | 0.30  | 93  | 0.10 | Motivation        | Intrinsic Motivation     | Approach  | TAP |
| Yang & Cao 2013     | OAP2M | 0.50  | 93  | 0.08 | Motivation (Ext)  | Extrinsic Motivation     | Approach  | OAP |
| Yang & Cao 2013     | SAP2M | 0.33  | 93  | 0.09 | Motivation (Ext)  | Extrinsic Motivation     | Approach  | SAP |
| Yang & Cao 2013     | TAP2M | 0.24  | 93  | 0.10 | Motivation (Ext)  | Extrinsic Motivation     | Approach  | TAP |
| Zhou et al. 2022 S2 | OAP1P | 0.42  | 348 | 0.04 | Performance       | Academic                 | Approach  | OAP |
| Zhou et al. 2022 S2 | OAV1P | -0.15 | 348 | 0.05 | Performance       | Academic                 | Avoidance | OAV |
| Zhou et al. 2022 S2 | SAP1P | 0.38  | 348 | 0.05 | Performance       | Academic                 | Approach  | SAP |

|                     |       |       |     |      |             |          |           |     |
|---------------------|-------|-------|-----|------|-------------|----------|-----------|-----|
| Zhou et al. 2022 S2 | SAV1P | -0.13 | 348 | 0.05 | Performance | Academic | Avoidance | SAV |
| Zhou et al. 2022 S2 | TAP1P | 0.35  | 348 | 0.05 | Performance | Academic | Approach  | TAP |
| Zhou et al. 2022 S2 | TAV1P | 0.10  | 348 | 0.05 | Performance | Academic | Avoidance | TAV |

**Supplement file.** All correlate random-effects funnel plots.

- Approach and Avoidance Achievement Goals and Correlates.

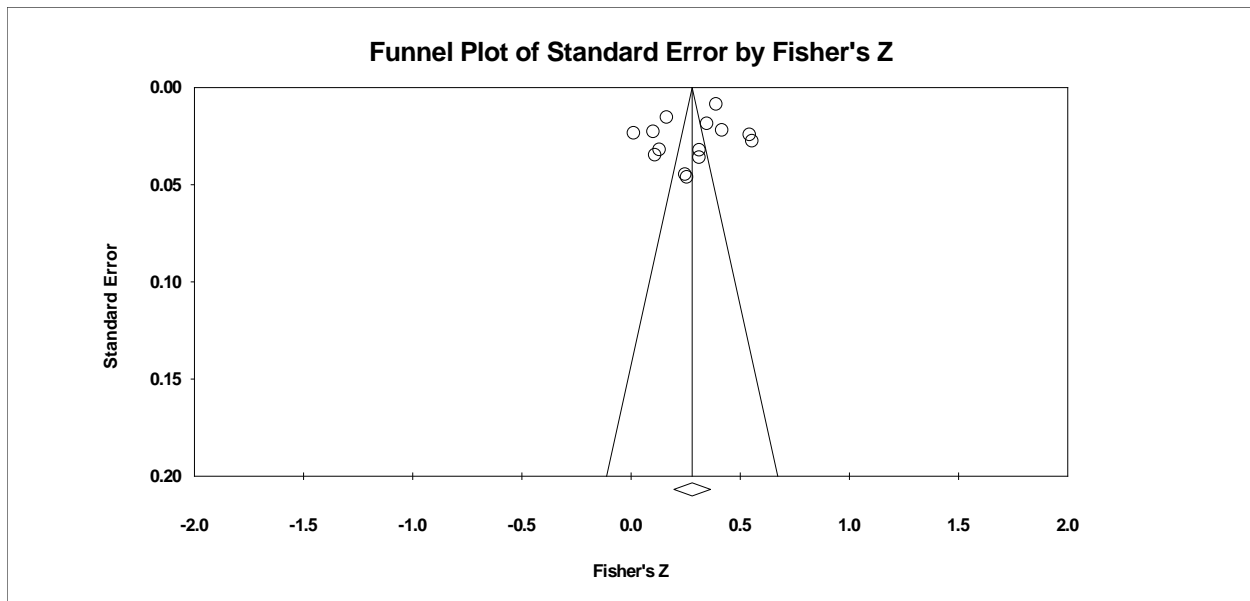

Figure S1. Approach goals and facilitative learning strategies random-effects funnel plot.

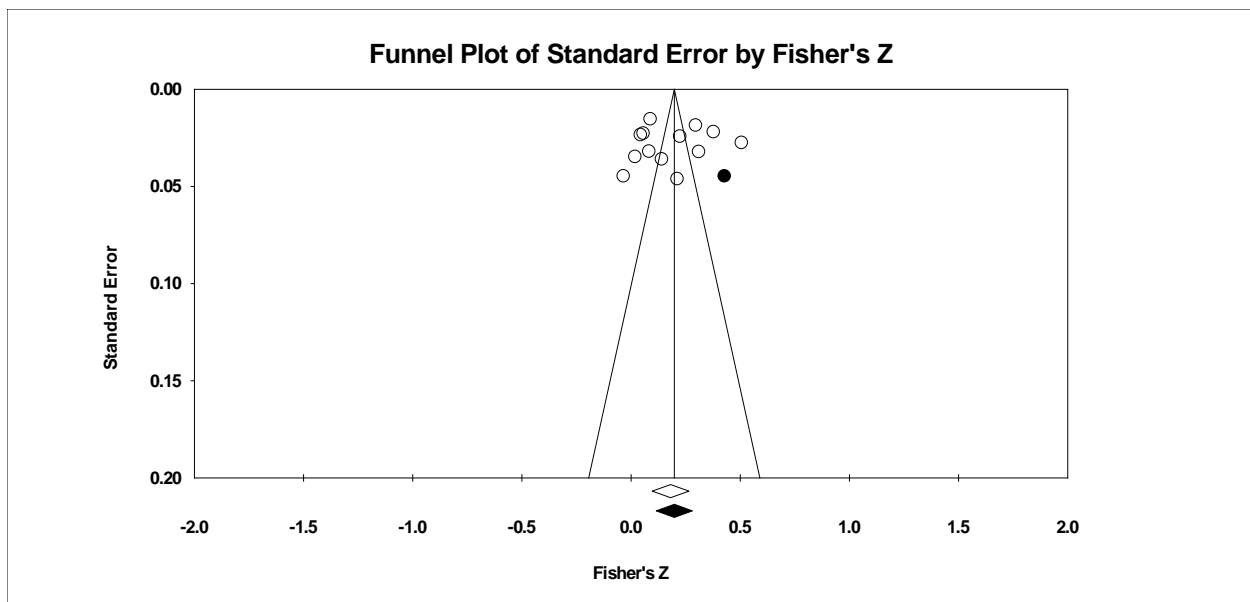

Figure S2. Avoidance goals and facilitative learning strategies random-effects funnel plot.



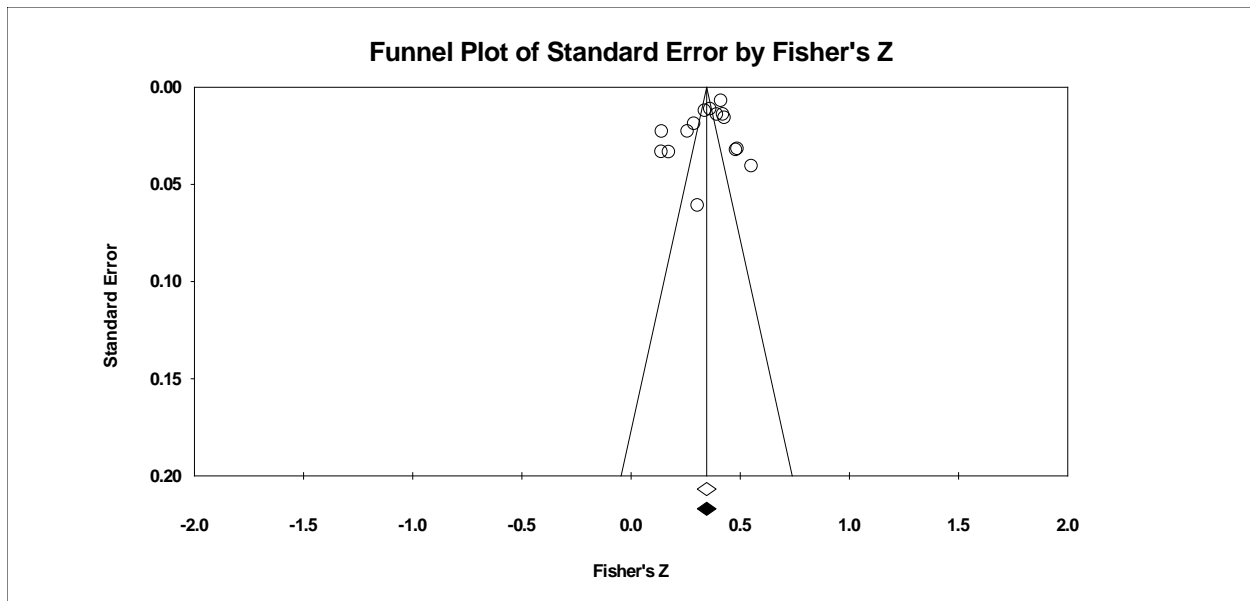

Figure S3. Approach goals and desired motivations random-effects funnel plot.

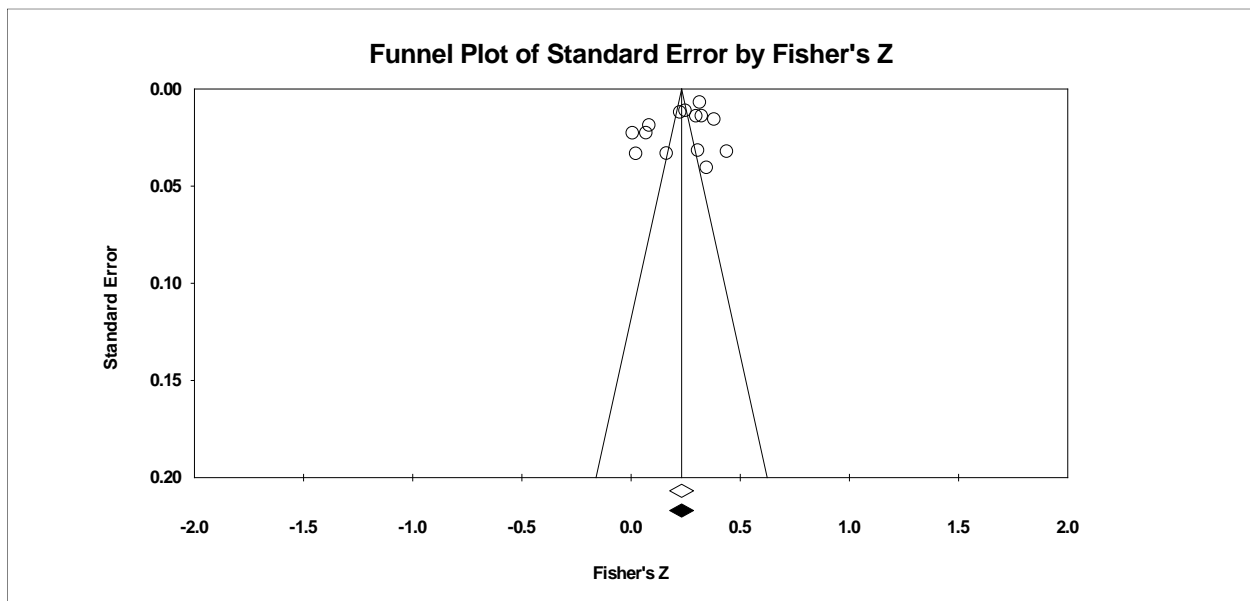

Figure S4. Avoidance goals and desired motivations random-effects funnel plot.

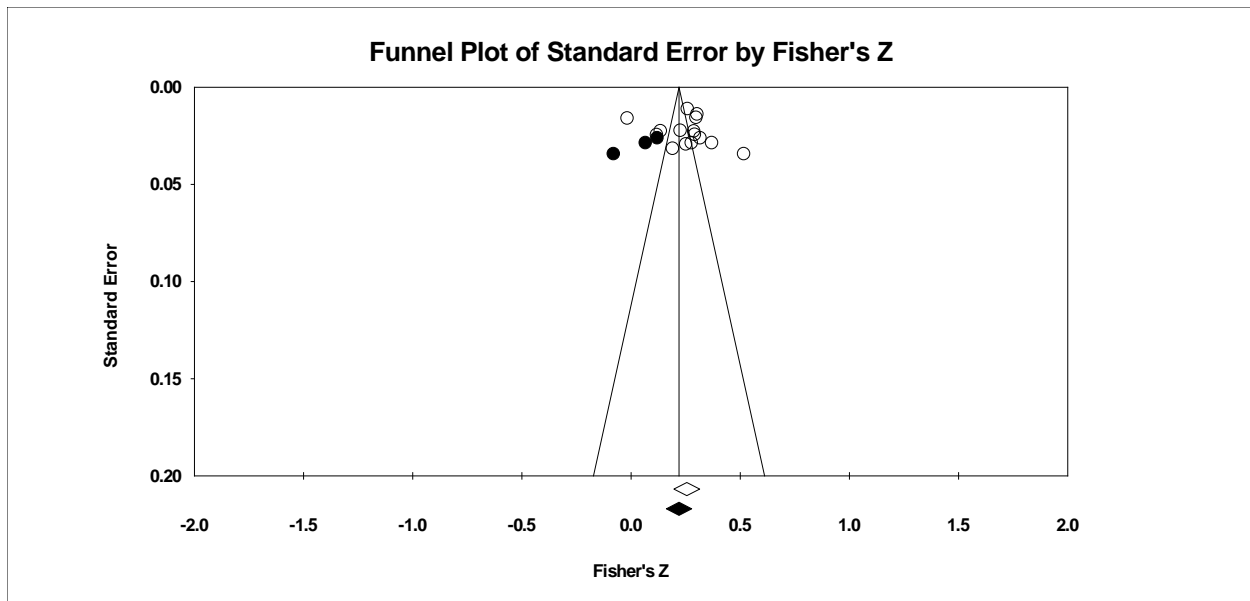

Figure S5. Approach goals and positive emotions random-effects funnel plot.

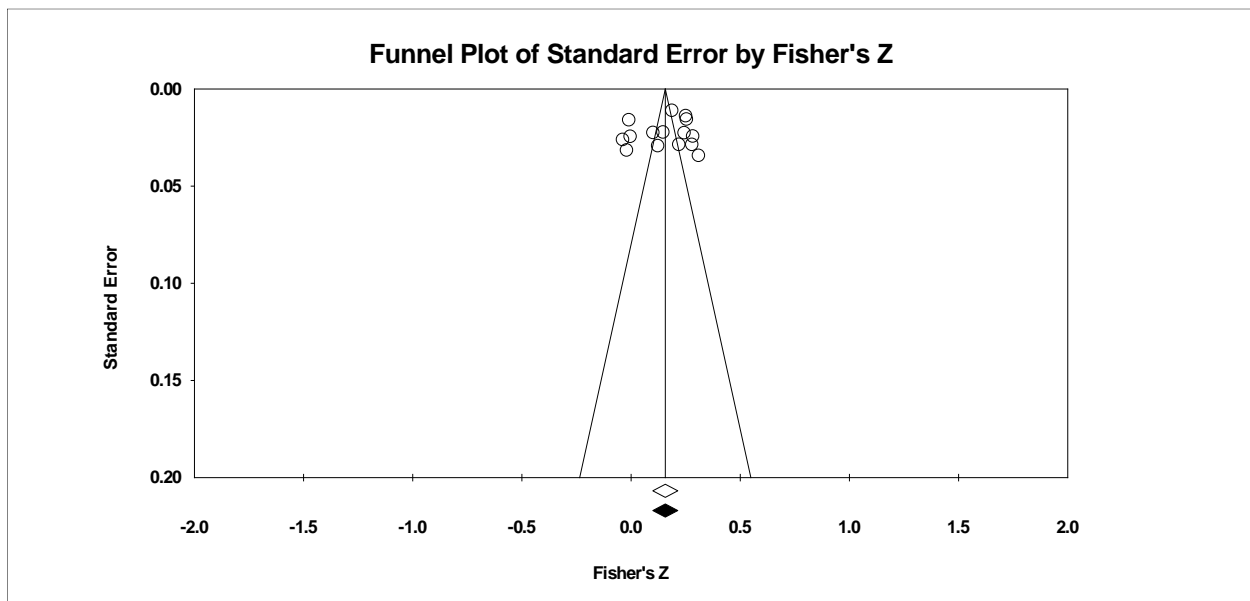

Figure S6. Avoidance goals and positive emotions random-effects funnel plot.

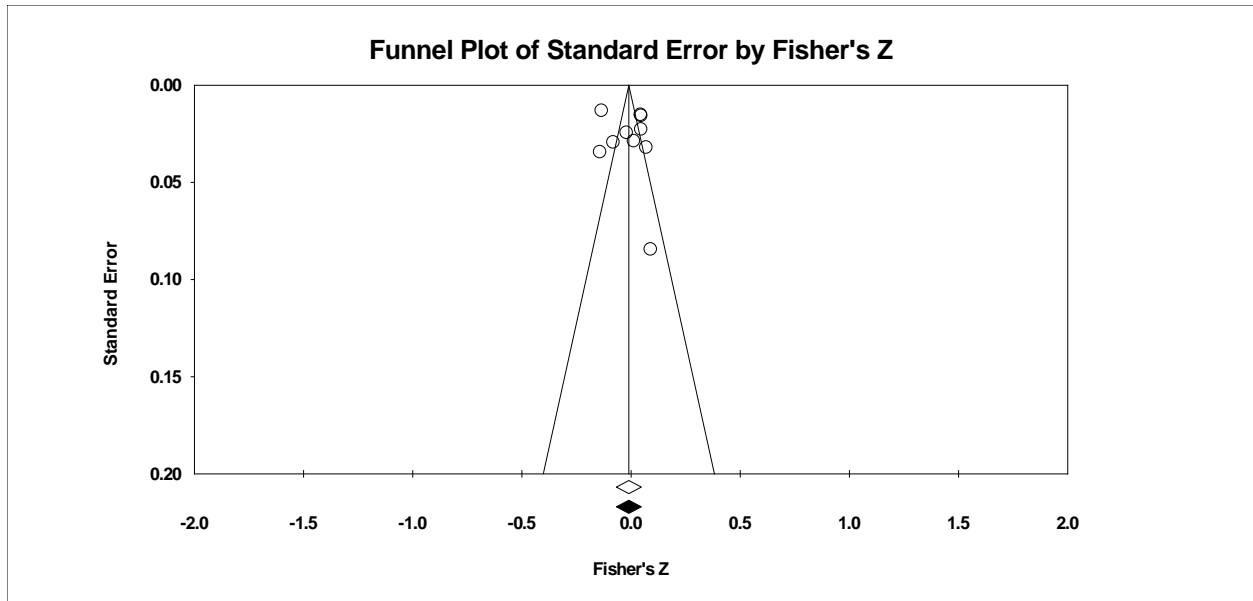

Figure S7. Approach goals and negative emotions random-effects funnel plot.

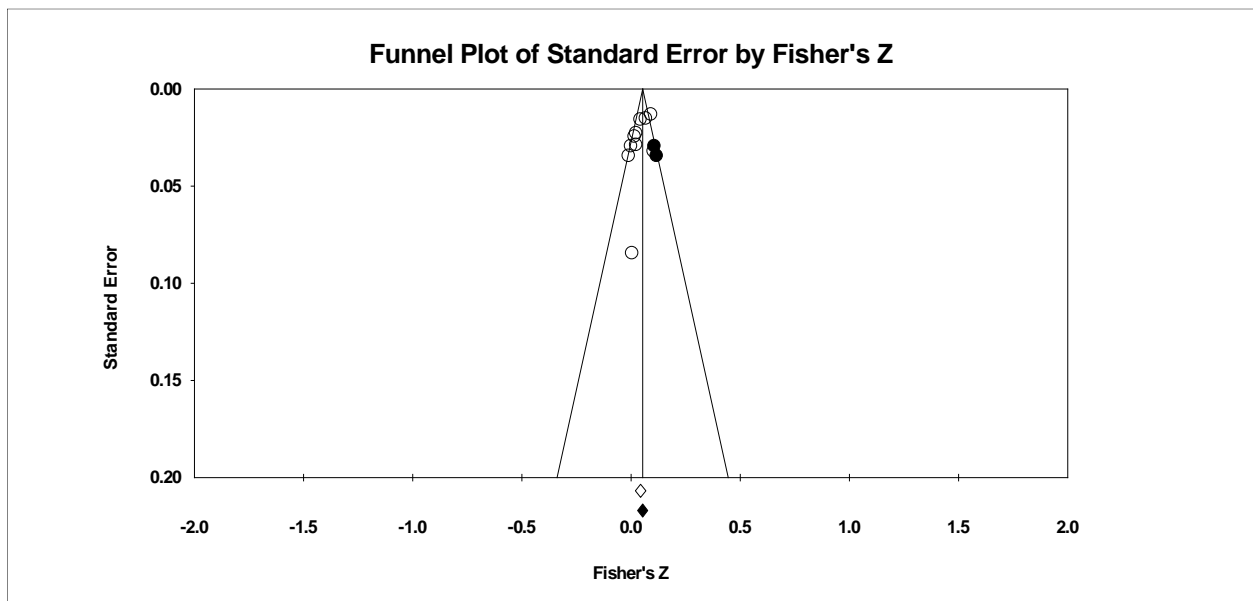

Figure S8. Avoidance goals and negative emotions random-effects funnel plot.

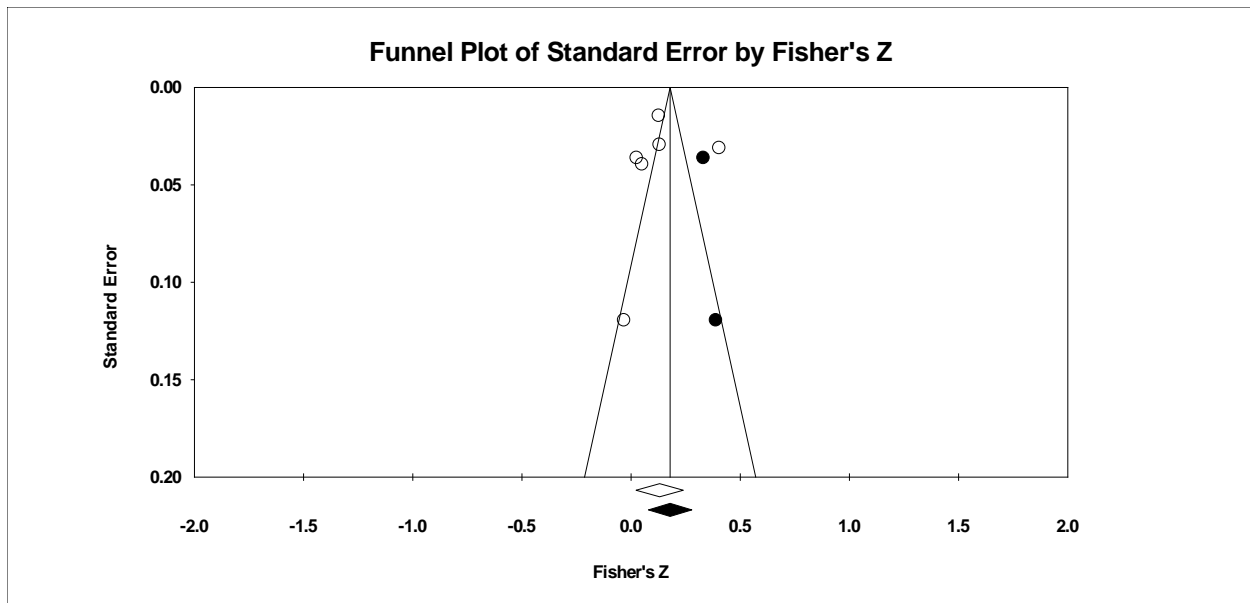

Figure S9. Approach goals and performance random-effects funnel plot.

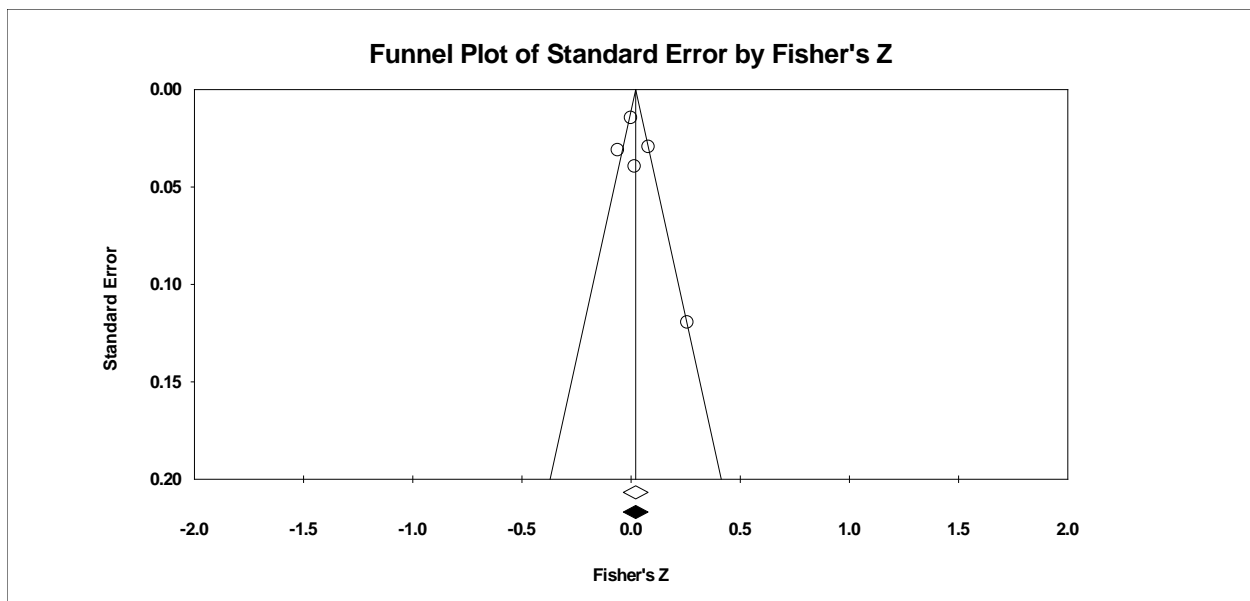

Figure S10. Avoidance goals and performance random-effects funnel plot.

- Task achievement goals and correlates.

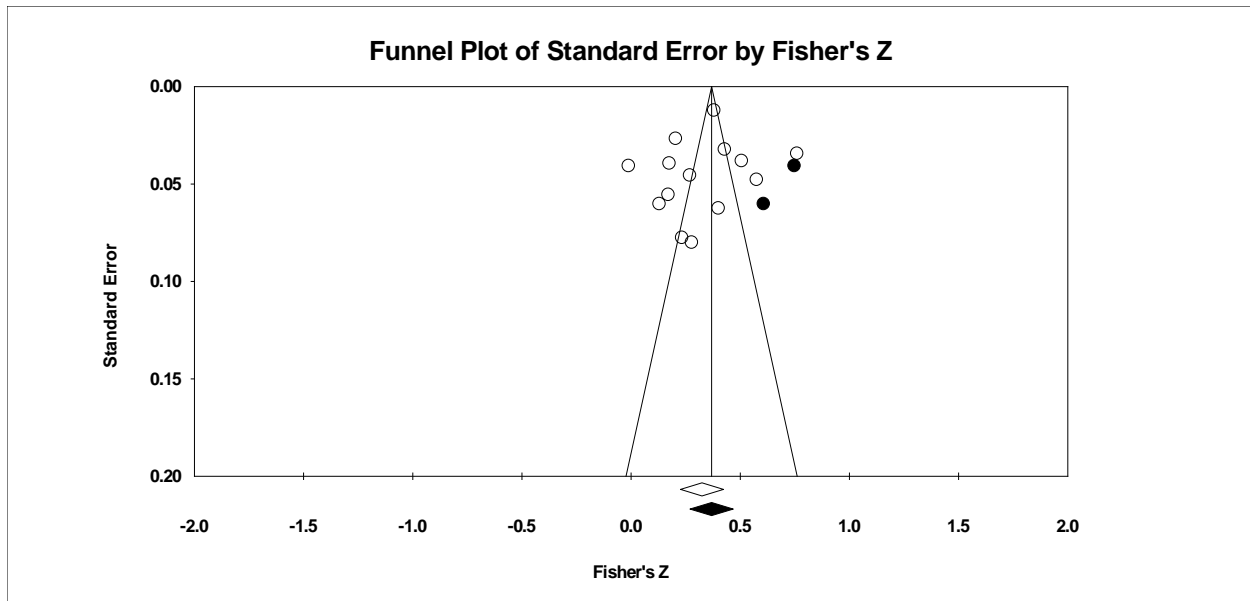

Figure S11. Task approach goal and facilitative learning strategies random-effects funnel plot.

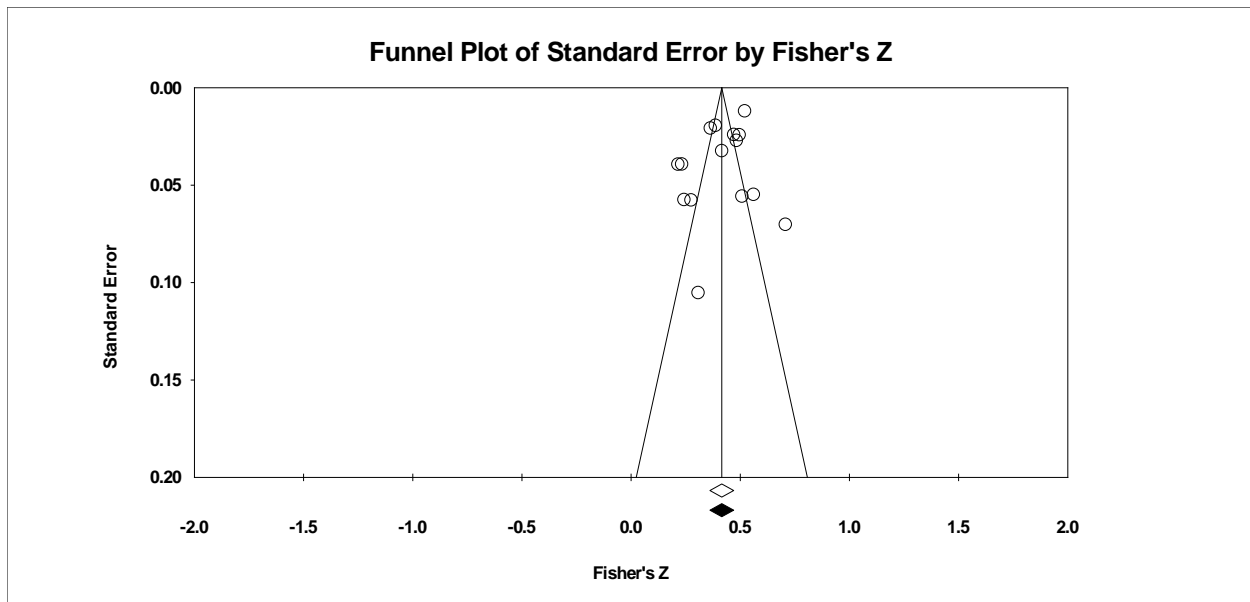

Figure S12. Task approach goal and desired motivations random-effects funnel plot.

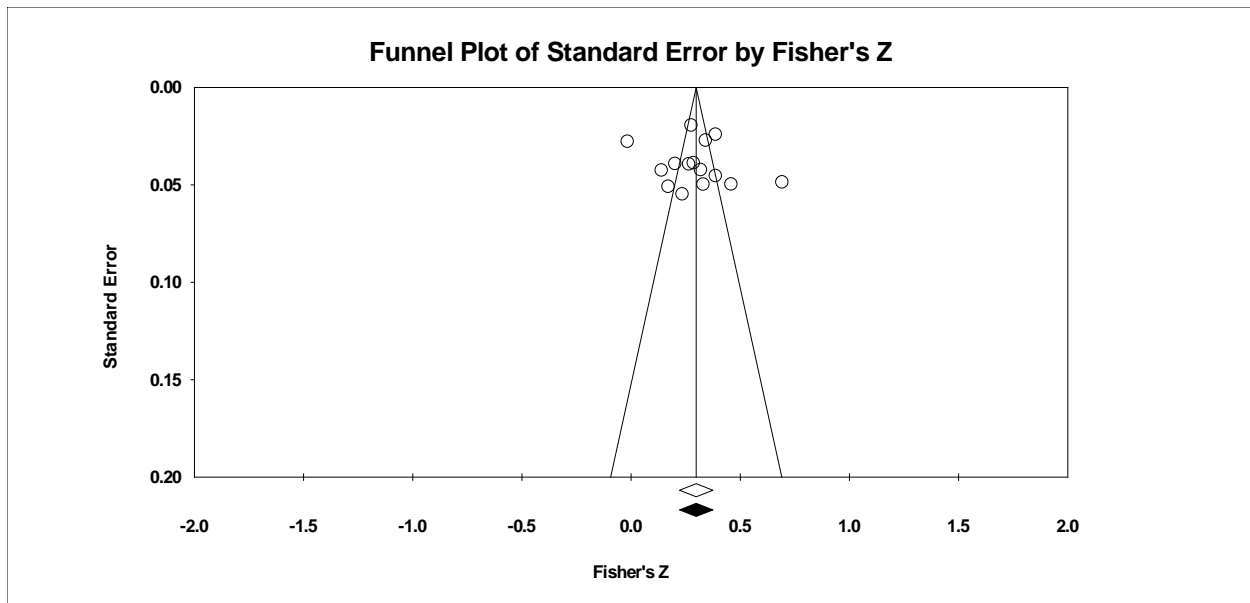

Figure S13. Task approach goal and positive emotions strategies random-effects funnel plot.

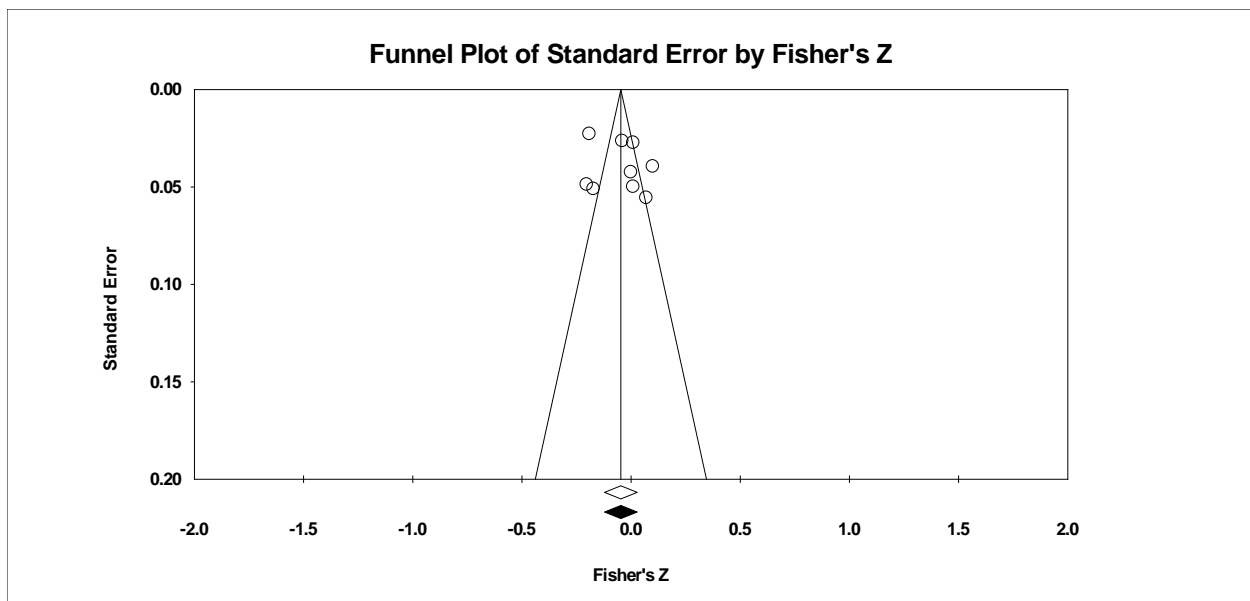

Figure S14. Task approach goal and negative emotions random-effects funnel plot.

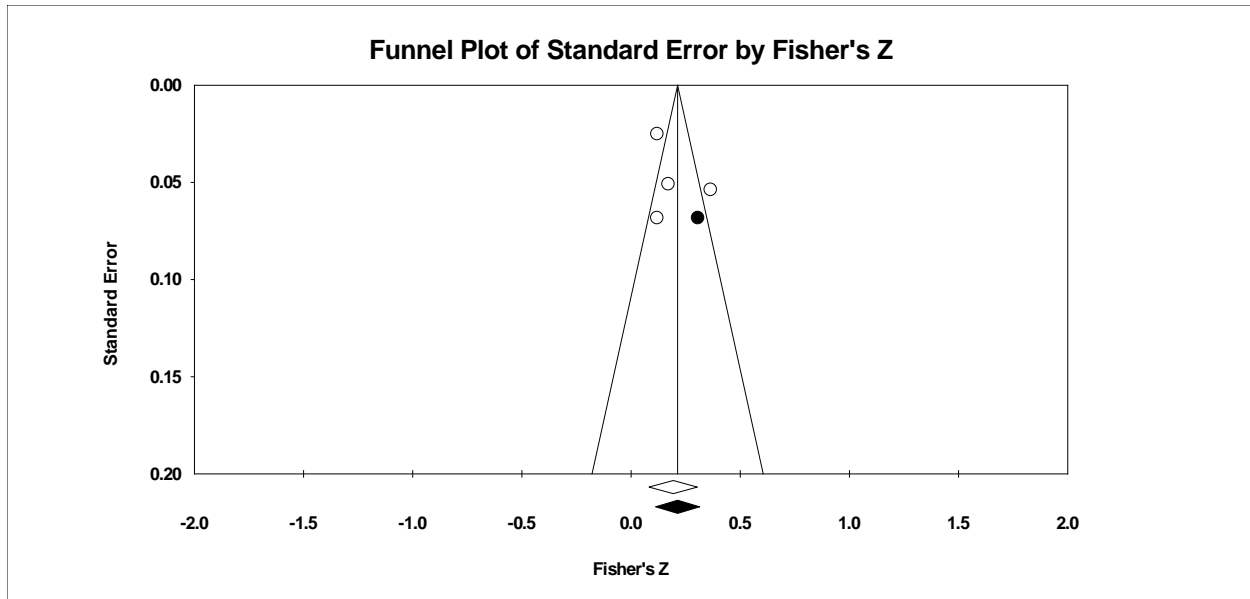

Figure S15. Task approach goal and performance random-effects funnel plot.

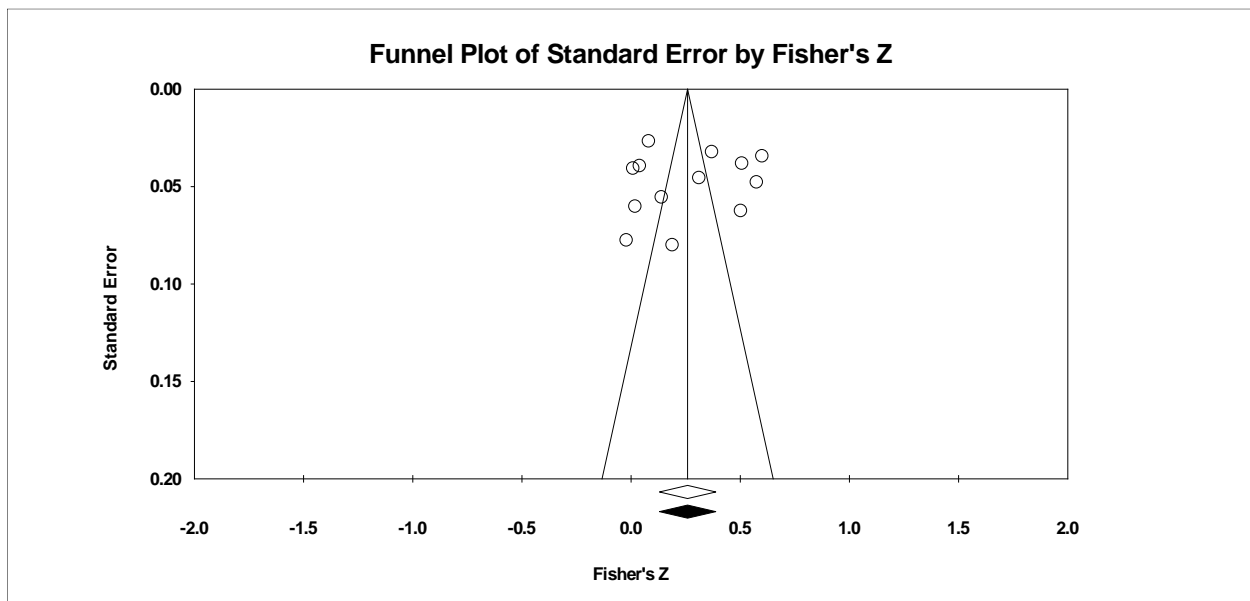

Figure S16. Task avoidance goal and facilitative learning strategies random-effects funnel plot.

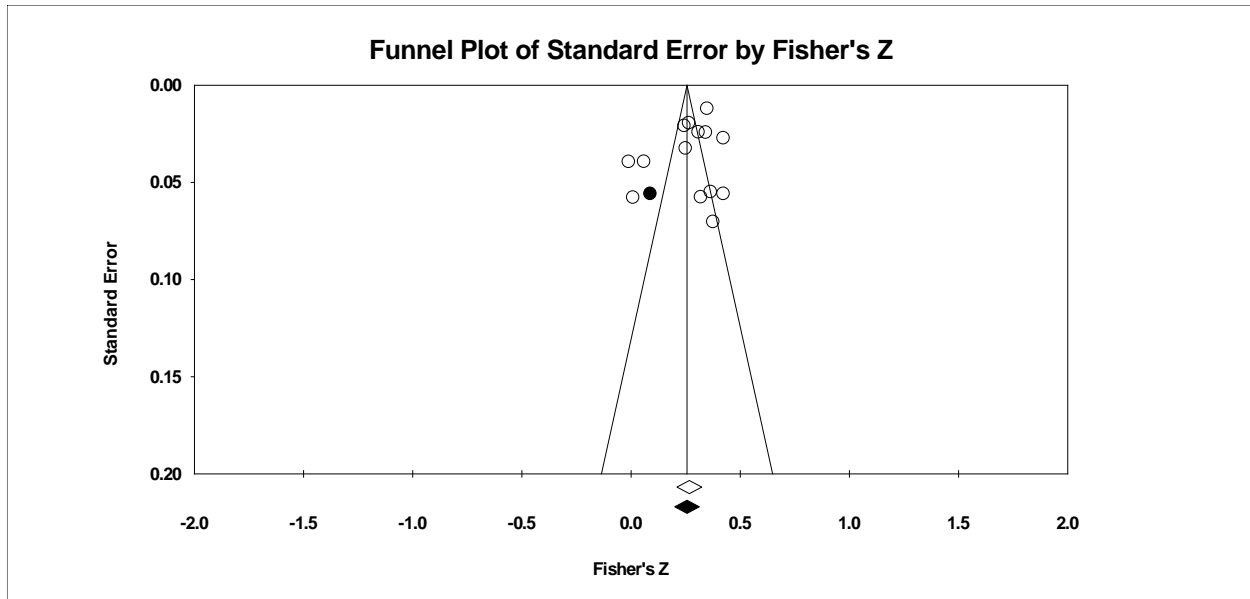

Figure S17. Task avoidance goal and desired motivations random-effects funnel plot.

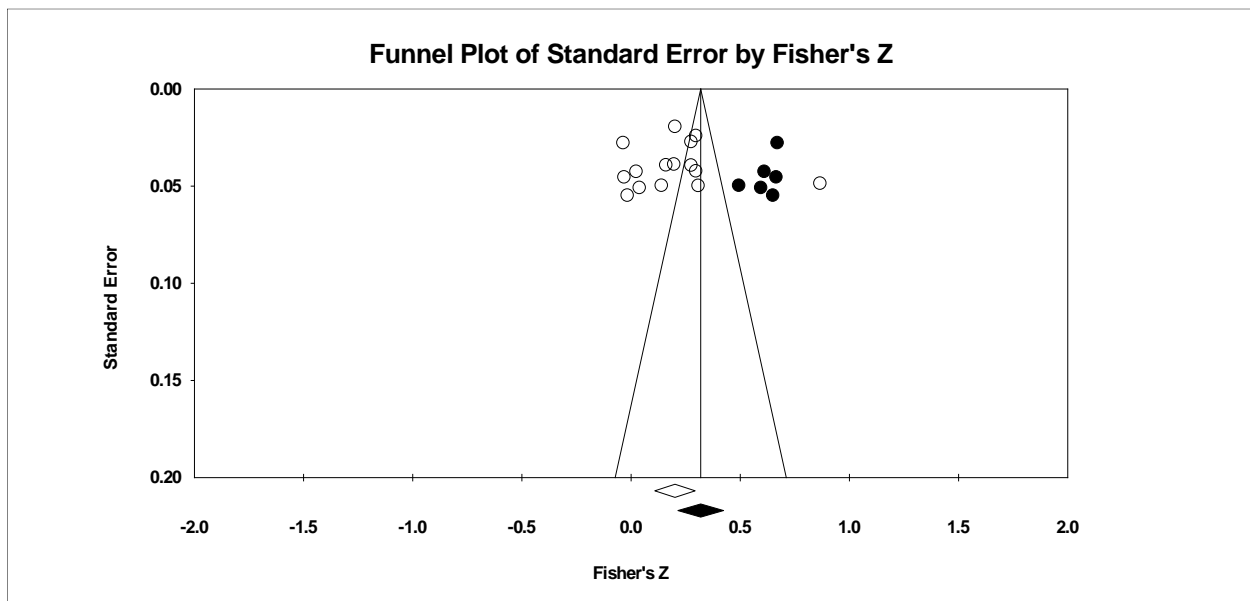

Figure S18. Task avoidance goal and positive emotions strategies random-effects funnel plot.



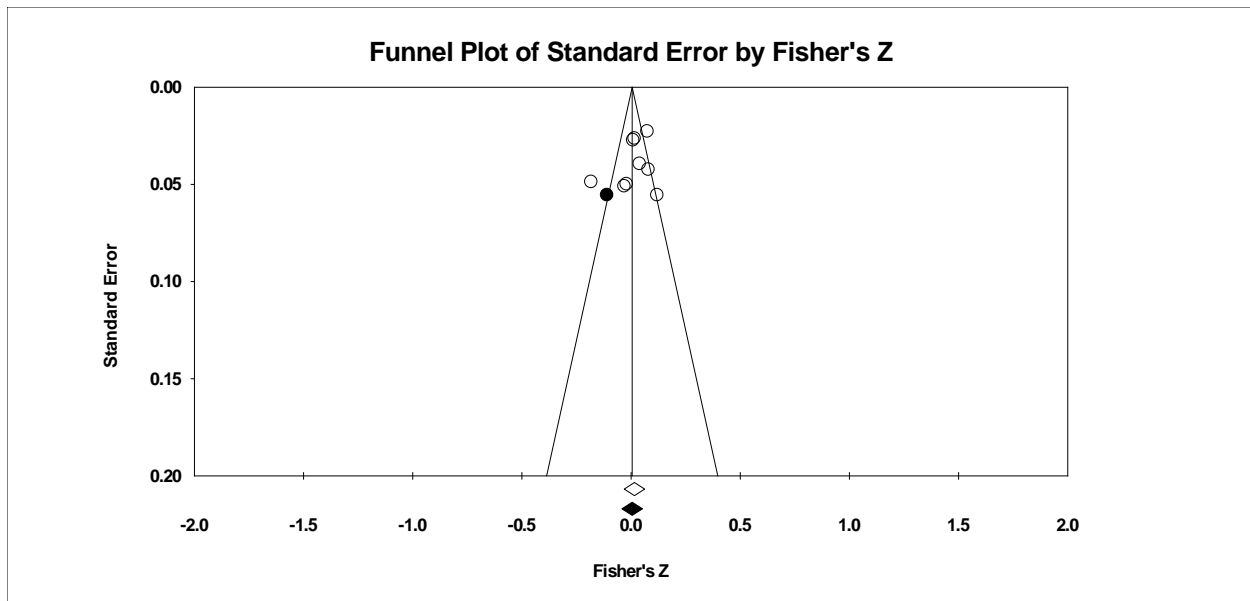

Figure S19. Task avoidance goal and negative emotions random-effects funnel plot.

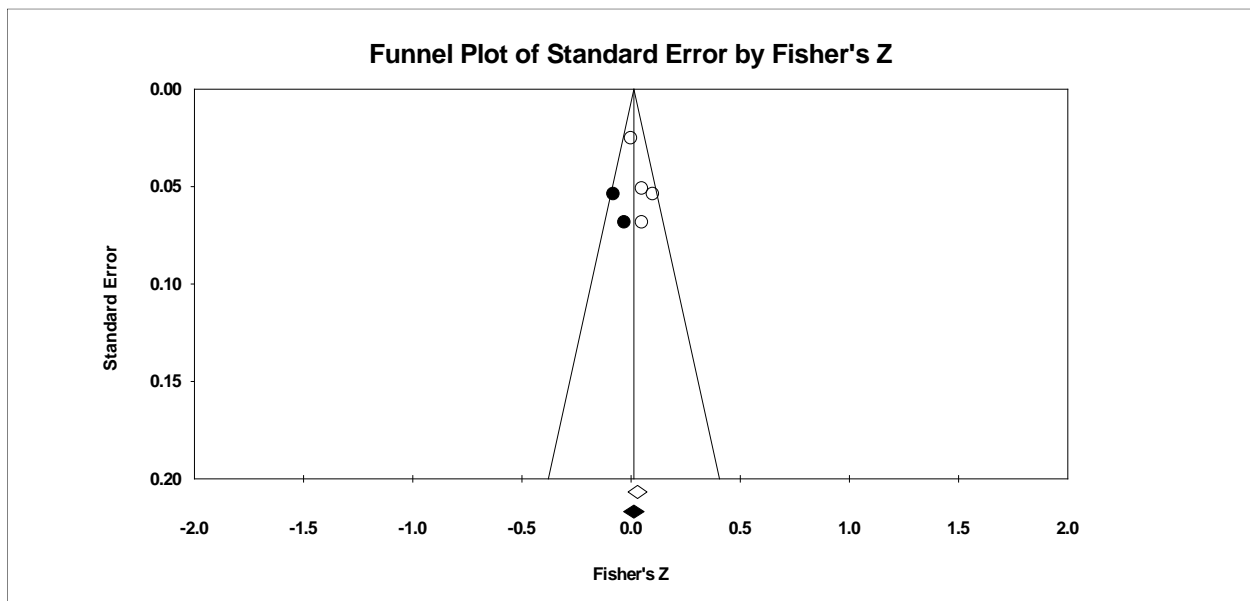

Figure S20. Task avoidance goal and performance random-effects funnel plot.

- Self- achievement goals and correlates.

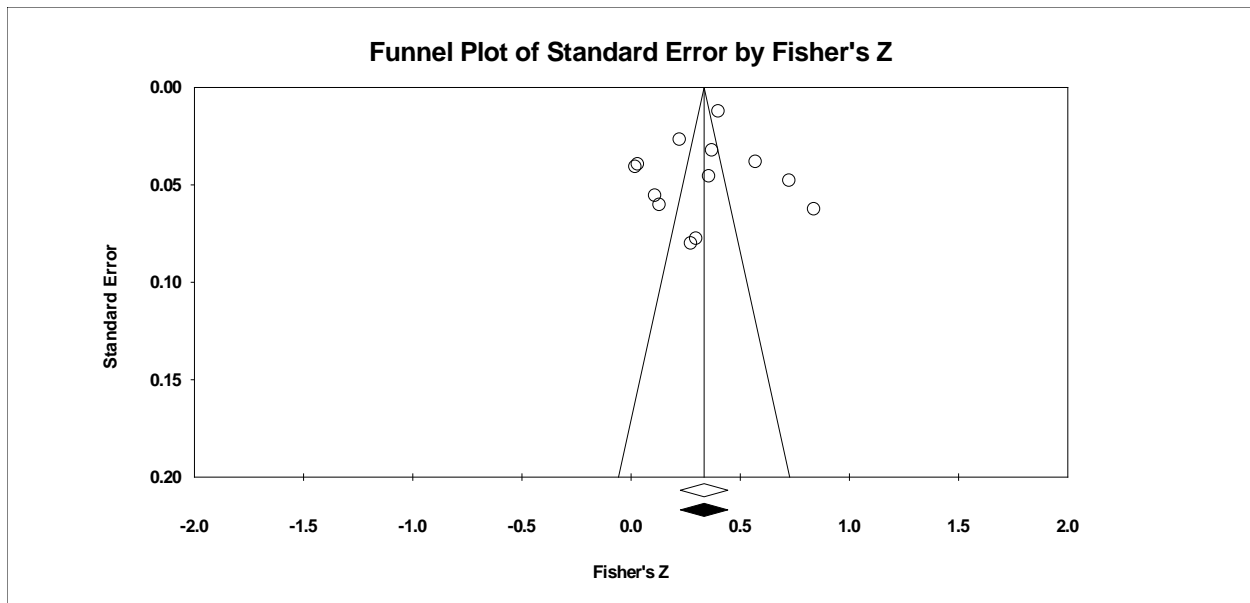

Figure S21. Self-approach goal and facilitative learning strategies random-effects funnel plot.

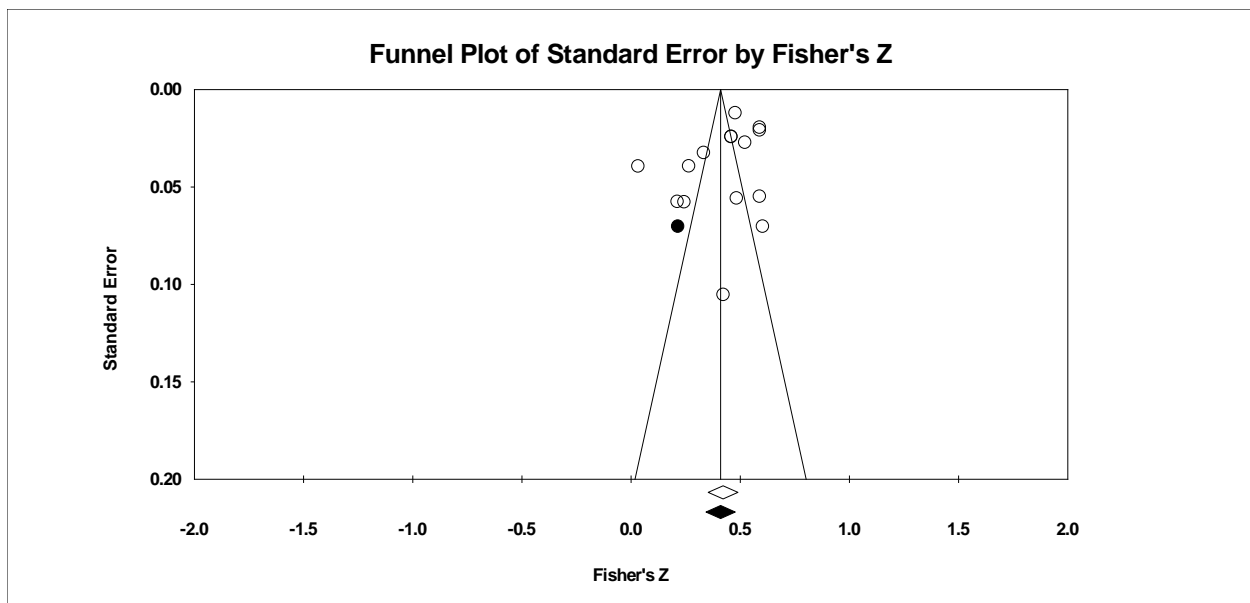

Figure S22. Self-approach goal and desired motivations random-effects funnel plot.

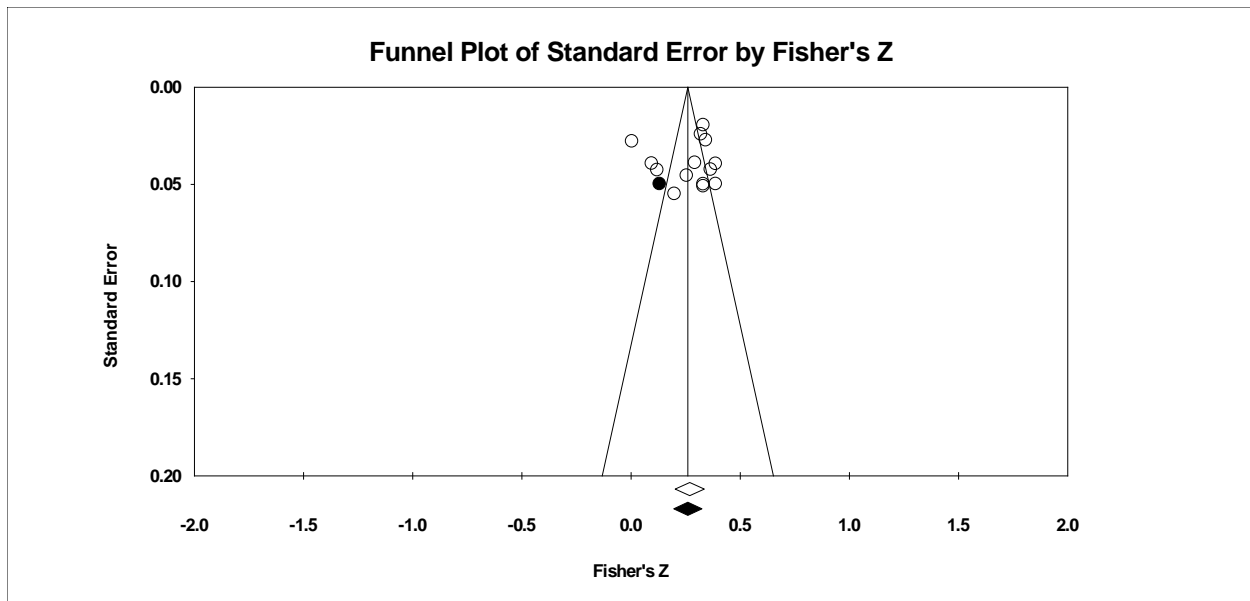

Figure S23. Self-approach goal and positive emotions strategies random-effects funnel plot.

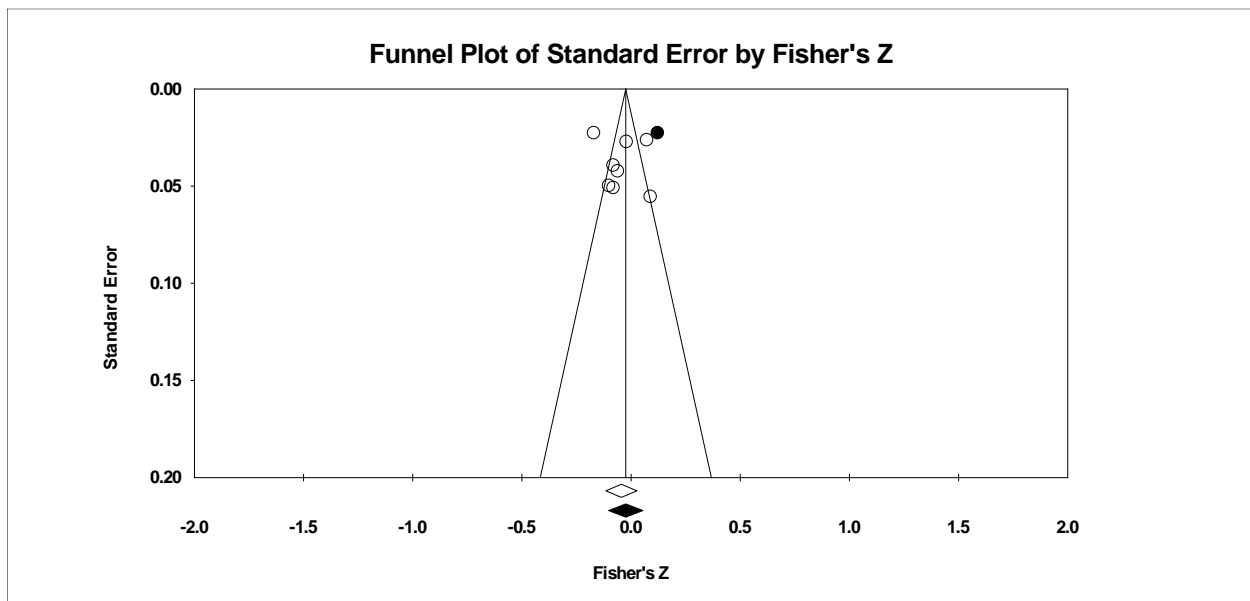

Figure S24. Self-approach goal and negative emotions random-effects funnel plot.

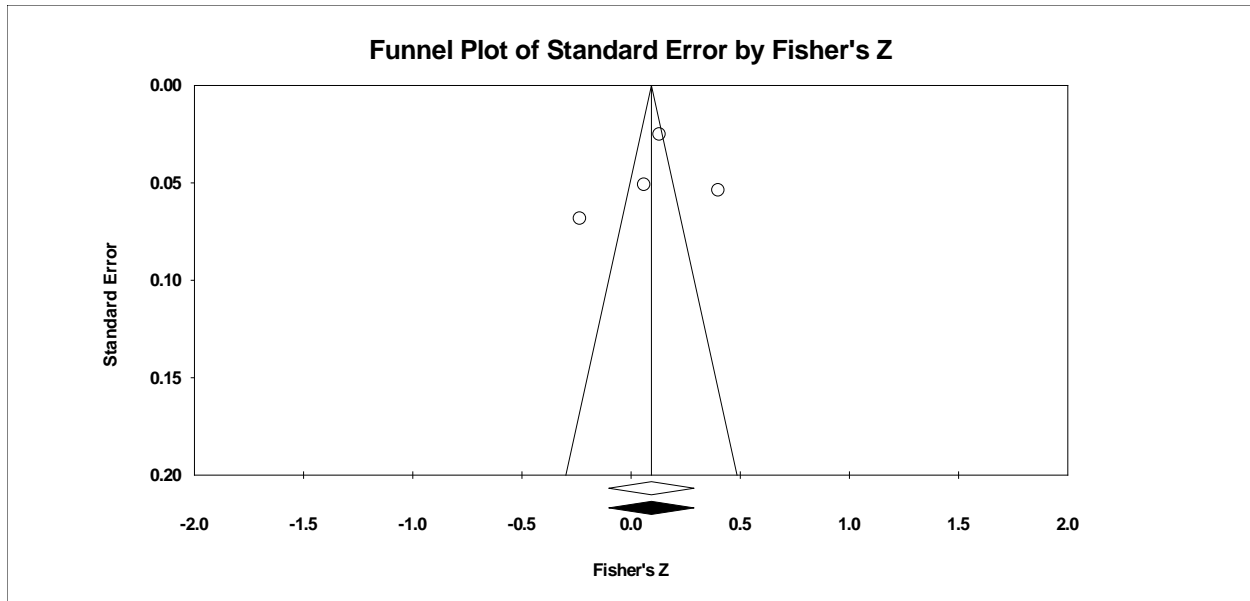

Figure S25. Self-approach goal and performance random-effects funnel plot.

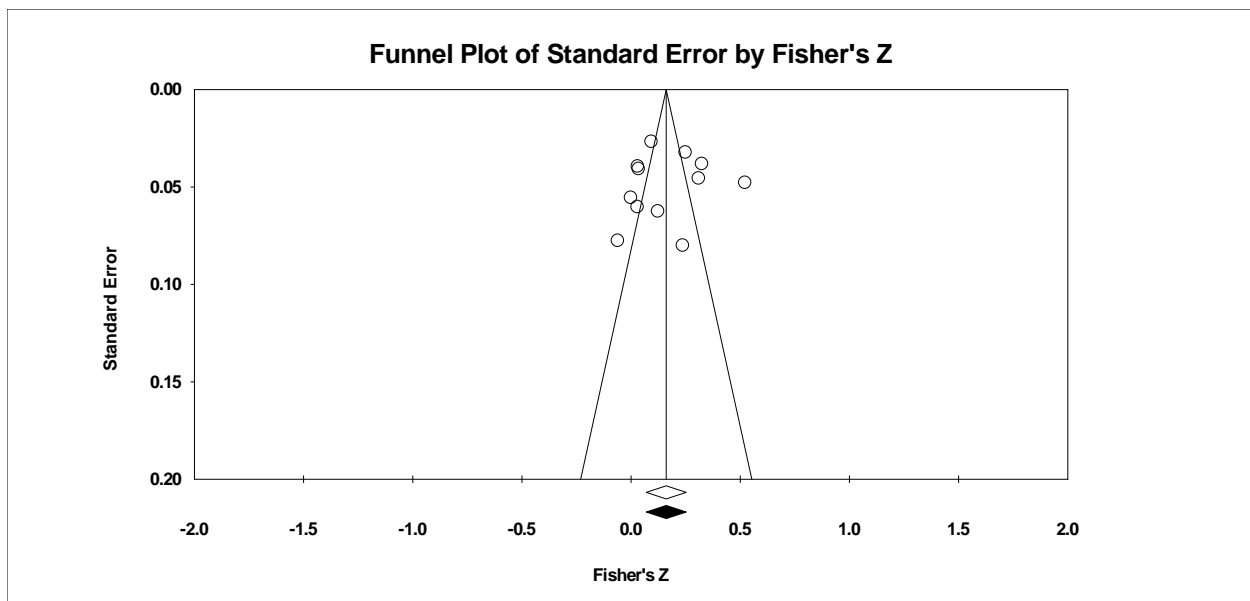

Figure S26. Self-avoidance goal and facilitative learning strategies random-effects funnel plot.

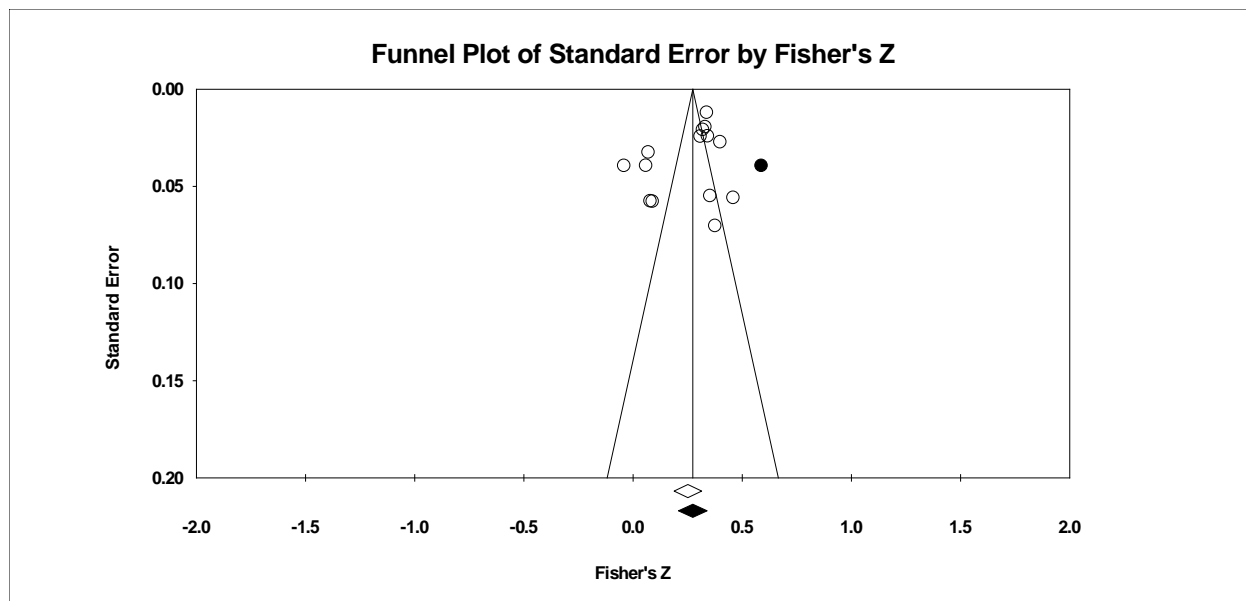

Figure S27. Self-avoidance goal and desired motivations random-effects funnel plot.

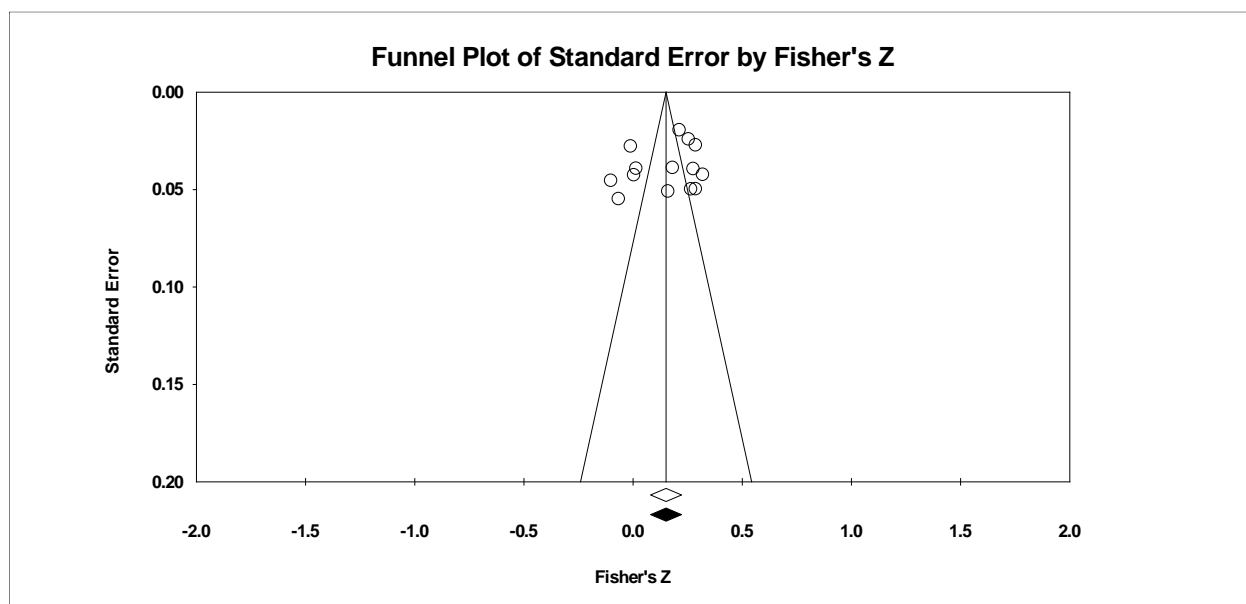

Figure Ss28. Self-avoidance goal and positive emotions strategies random-effects funnel plot.

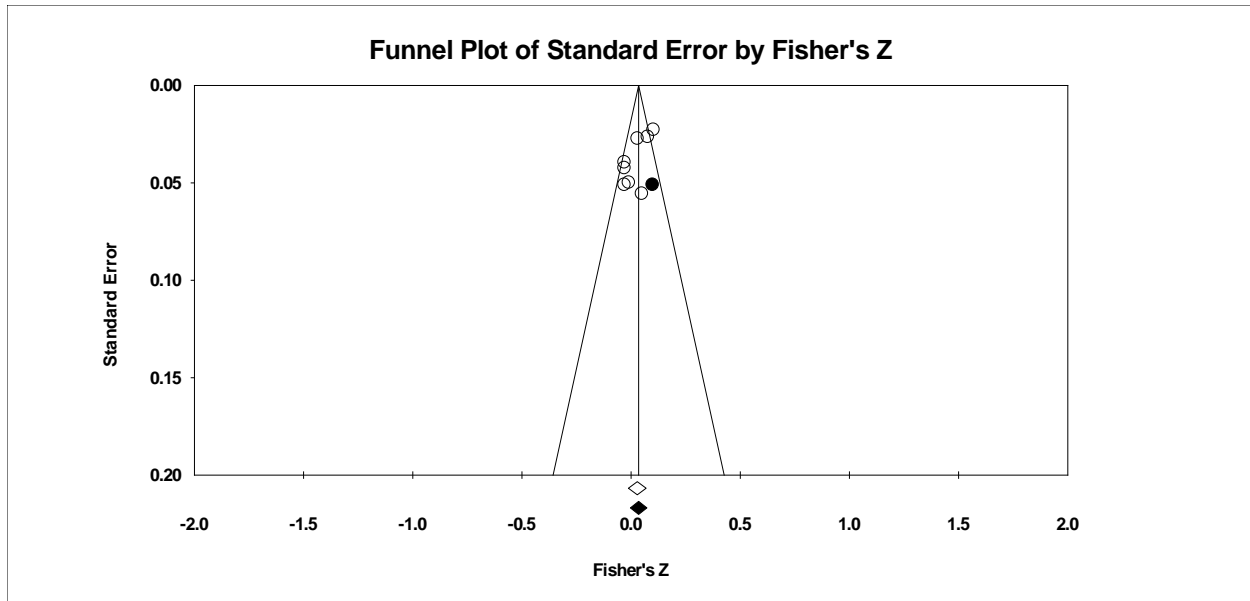

Figure S29. Self-avoidance goal and negative emotions random-effects funnel plot.

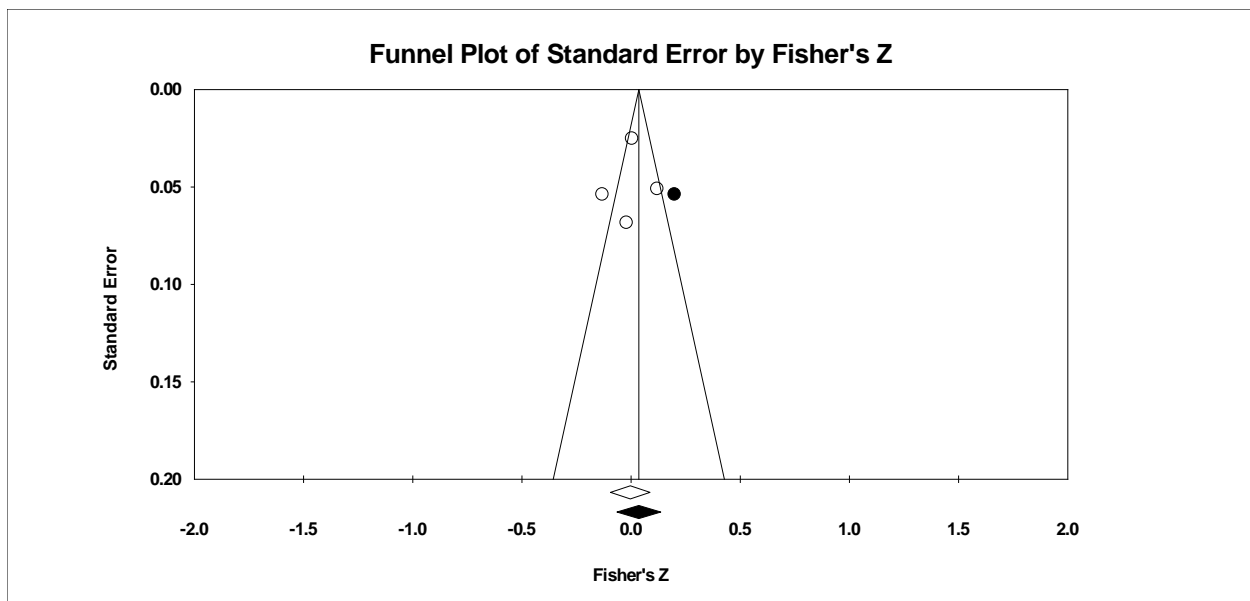

Figure S30. Self-avoidance goal and performance random-effects funnel plot.

- Other achievement goals and correlates.

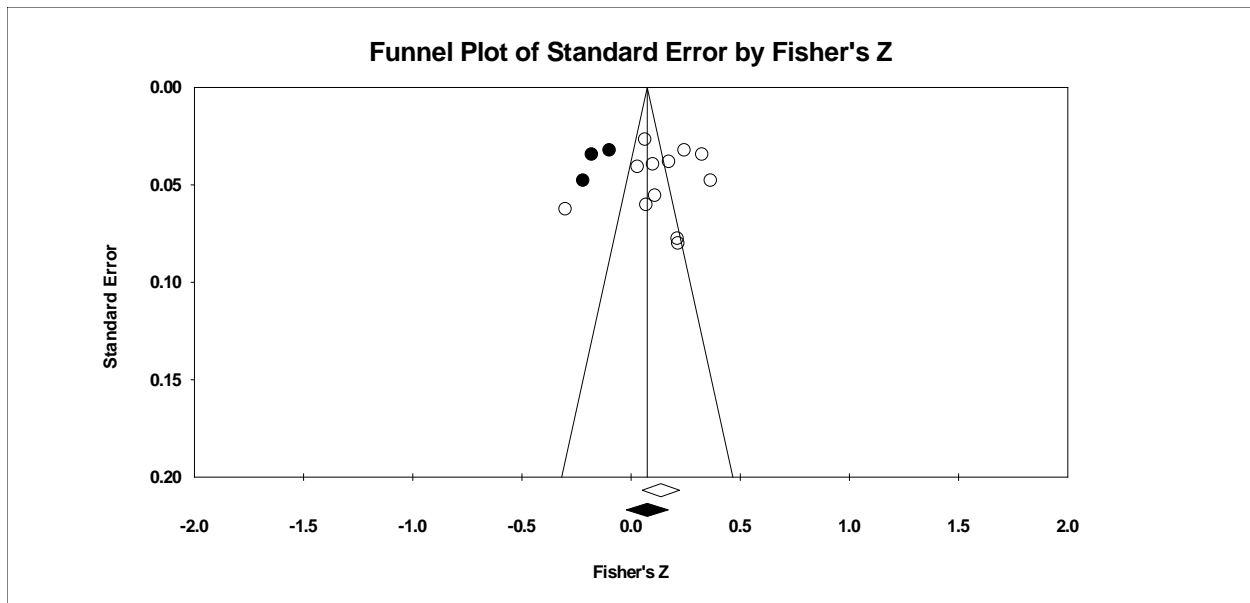

Figure S31. Other approach goal and facilitative learning strategies random-effects funnel plot.

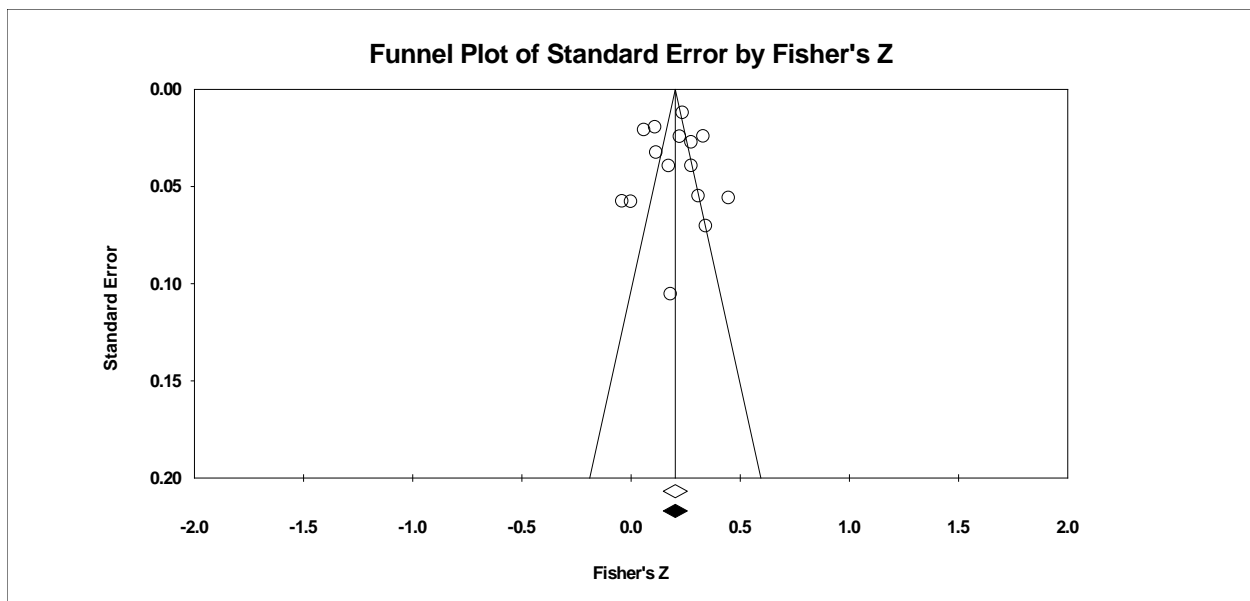

Figure S32. Other approach goal and desired motivations random-effects funnel plot.

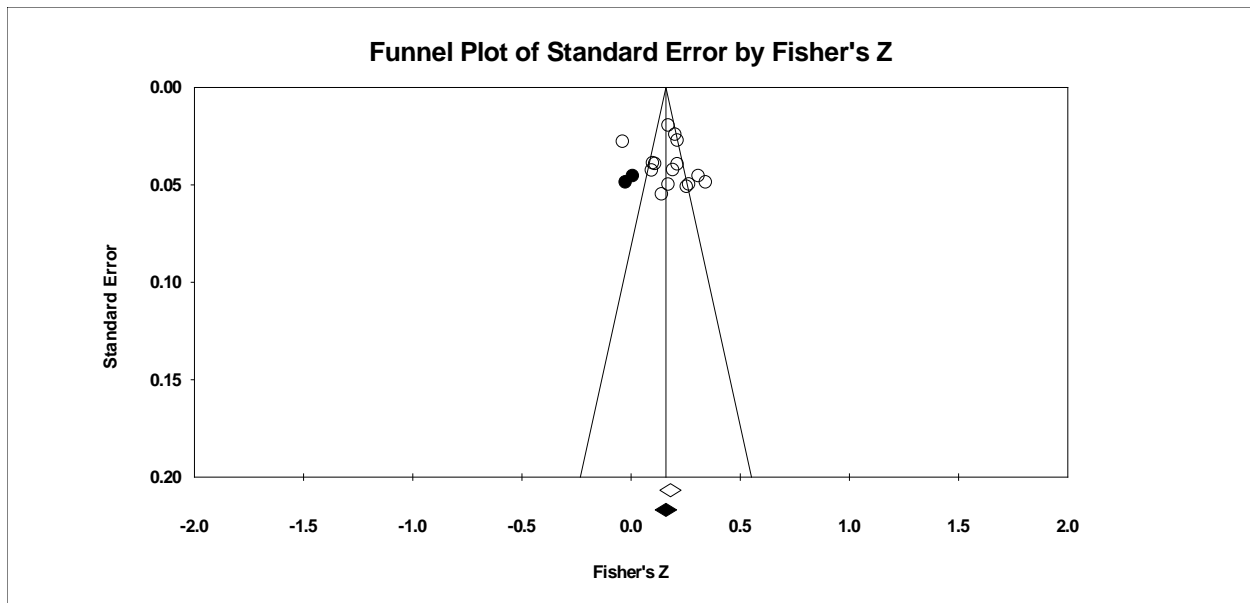

Figure S33. Other approach goal and positive emotions strategies random-effects funnel plot.

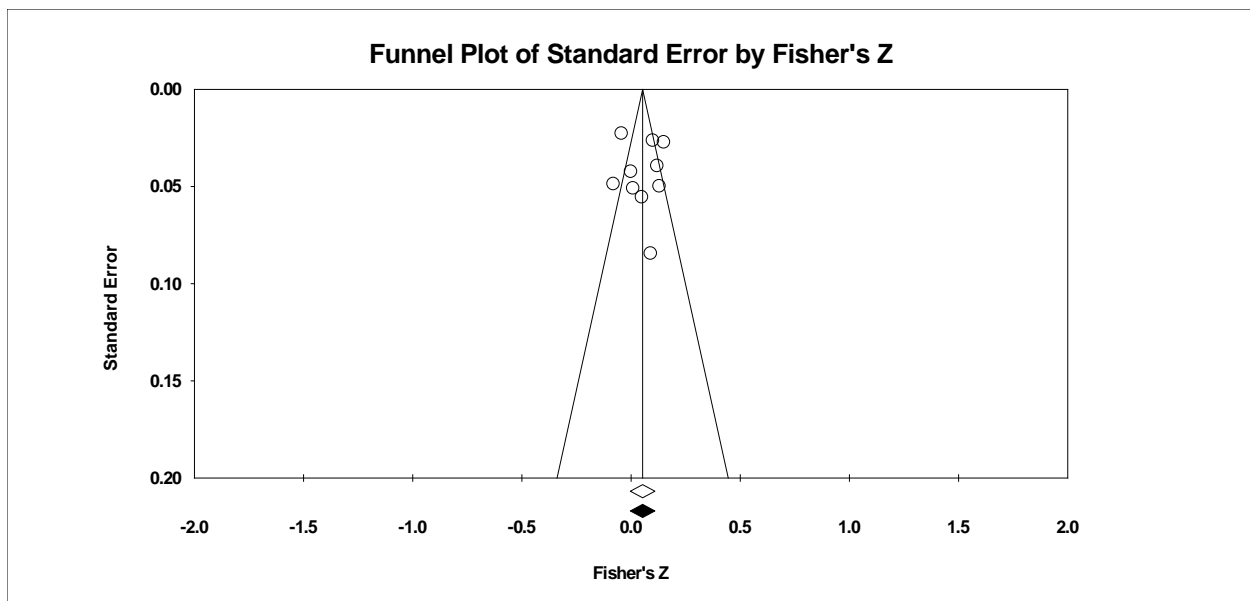

Figure S34. Other approach goal and negative emotions random-effects funnel plot.



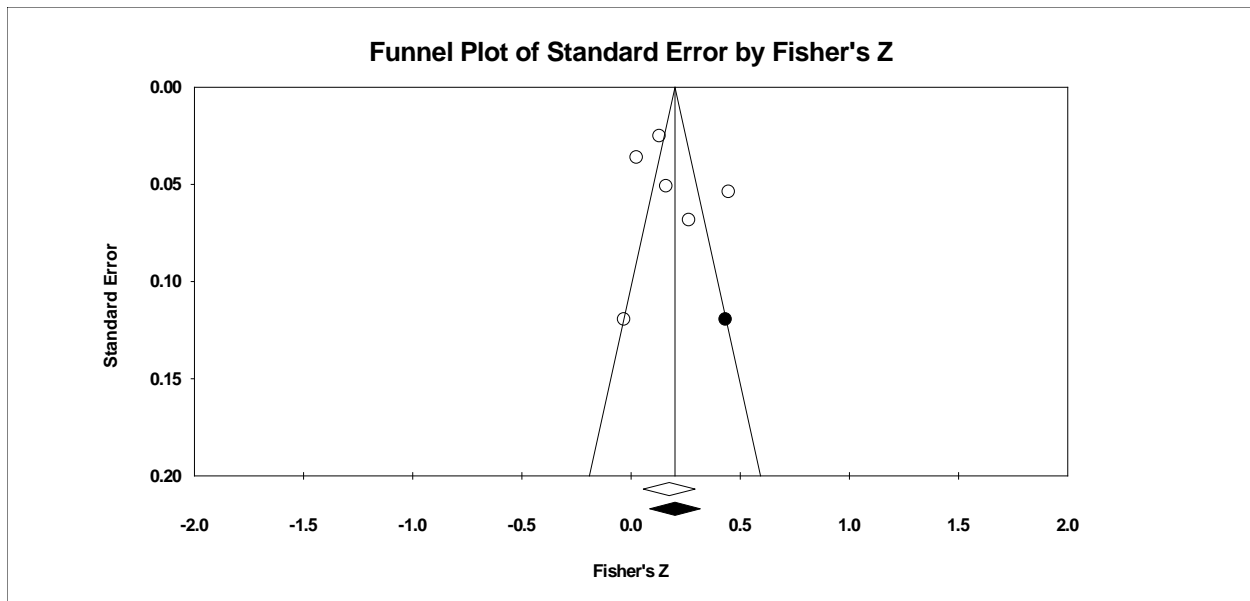

Figure S35. Other approach goal and performance random-effects funnel plot.

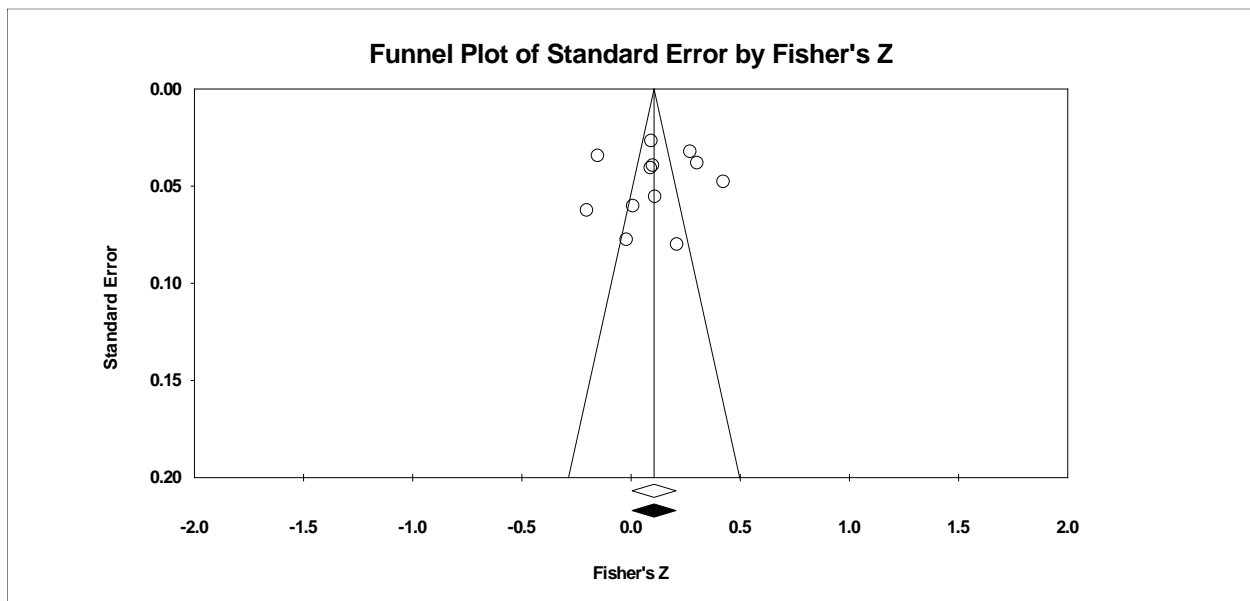

Figure S36. Other avoidance goal and facilitative learning strategies random-effects funnel plot.

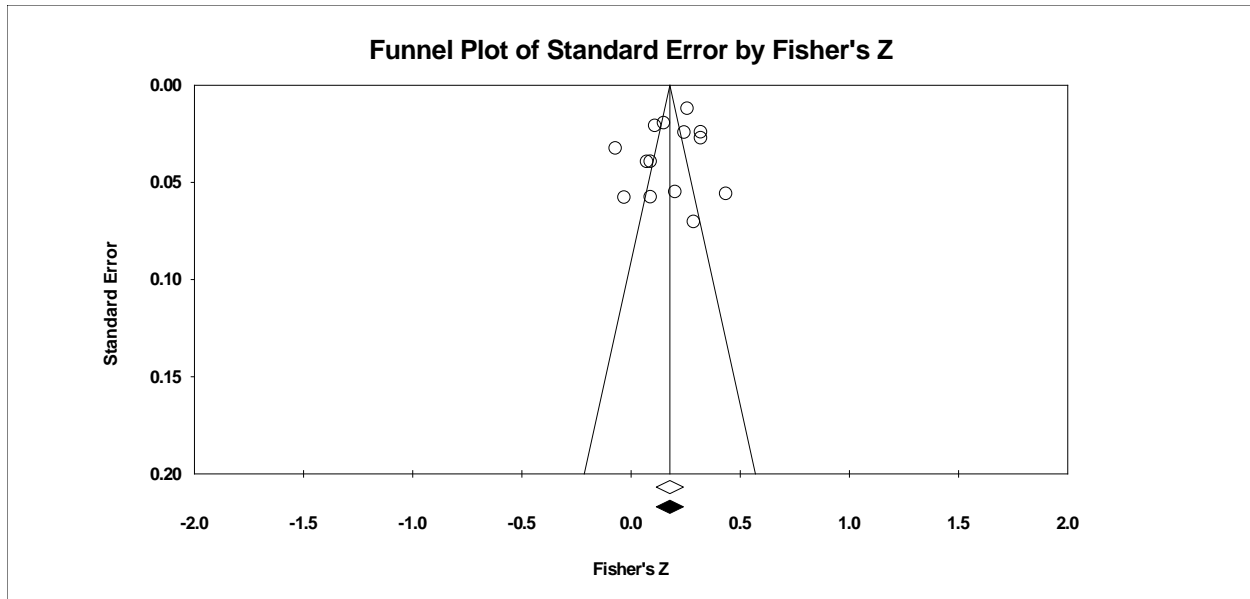

Figure S37. Other avoidance goal and desired motivations random-effects funnel plot.

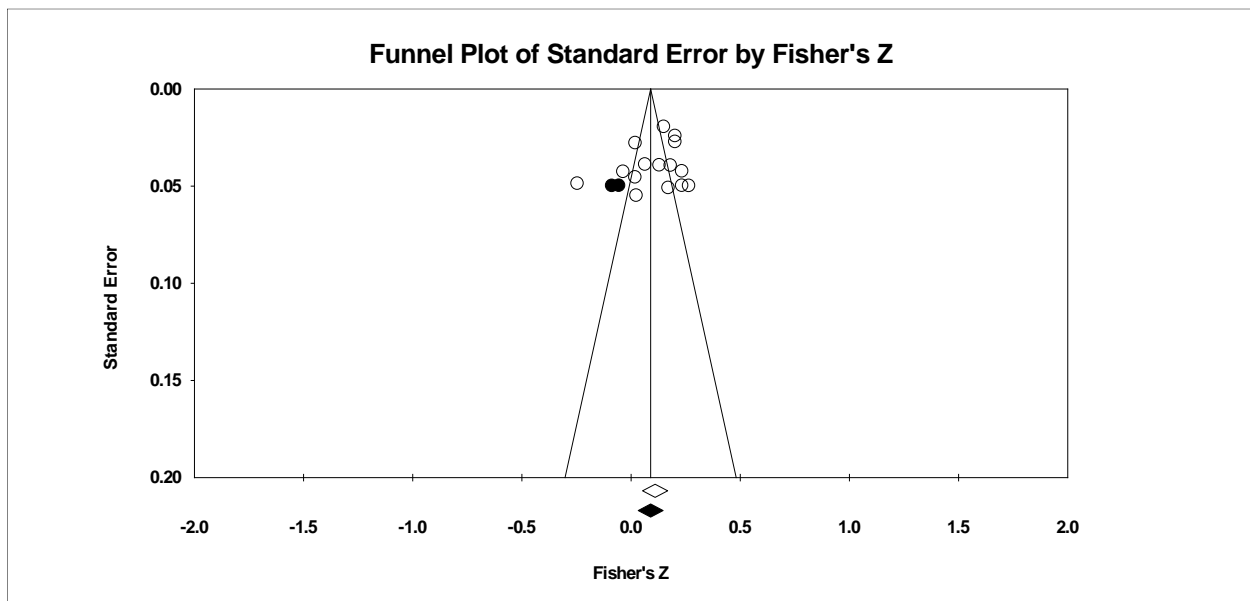

Figure S38. Other avoidance goal and positive emotions strategies random-effects funnel plot.

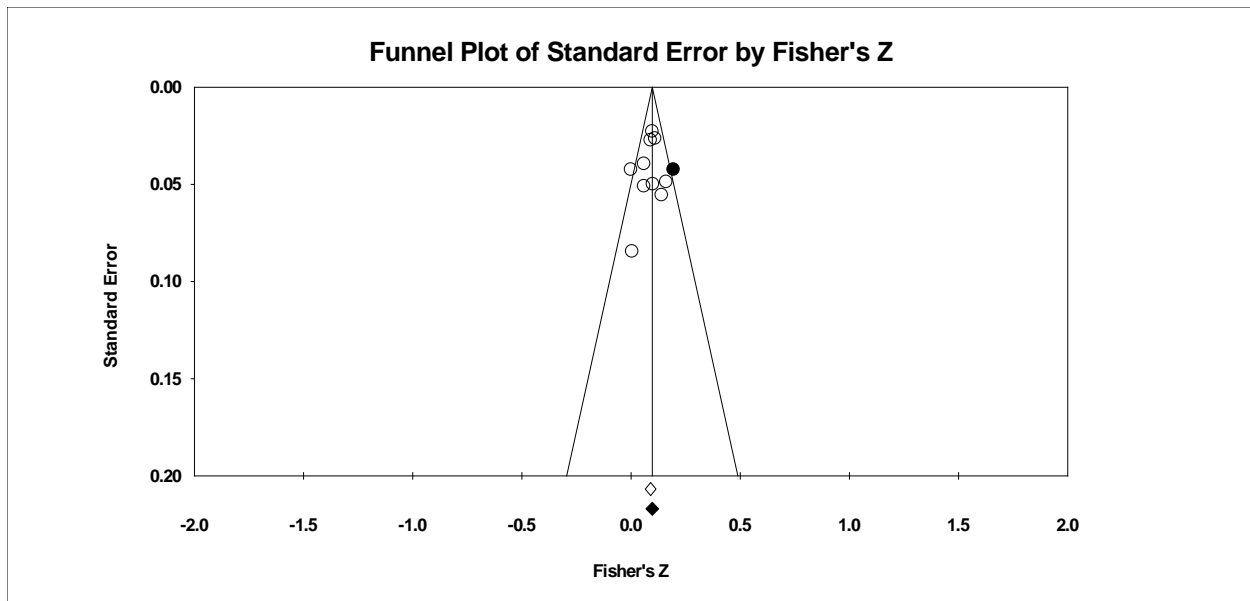

Figure S39. Other avoidance goal and negative emotions random-effects funnel plot.

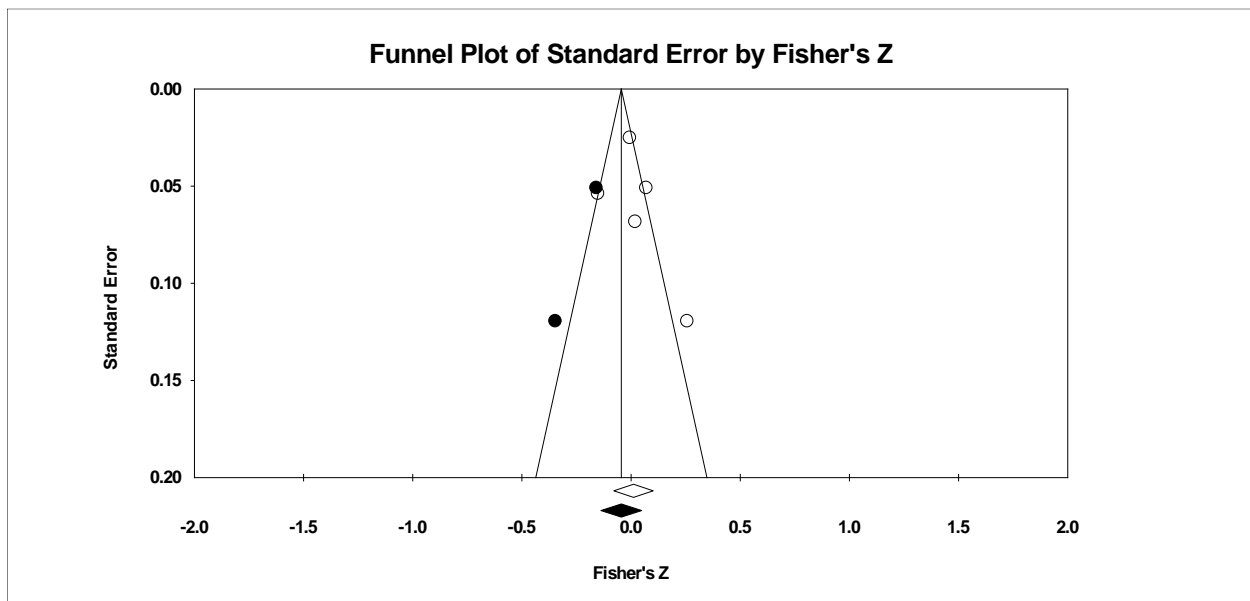

Figure S40. Other avoidance goal and performance random-effects funnel plot.
